# Supplementary material for: Unveiling the promising anticancer activity of palladium(ii)–aryl complexes bearing diphosphine ligands: a structure–activity relationship analysis
Source: Royal Society of Chemistry journal article supplement (doi:10.1039/d4dt00919c), 2024-01-01
Supplement: d4dt00919c1.pdf [file d4dt00919c1.pdf]

## Electronic Supplementary Information

### Unveiling the promising anticancer activity of palladium(II)-aryl complexes bearing diphosphine ligands: a structure-activity relationship analysis

Giovanni Tonon,<sup>a</sup> Matteo Mauceri,<sup>a</sup> Enrico Cavarzerani,<sup>a</sup> Rachele Piccolo,<sup>a</sup> Claudio Santo,<sup>a</sup> Nicola Demitri,<sup>b</sup> Laura Orian,<sup>c</sup> P. A. Nogara,<sup>d</sup> J. B. T. Rocha,<sup>d</sup> Vincenzo Canzonieri,<sup>e,f</sup> Flavio Rizzolio,<sup>\*a,e</sup> Fabiano Visentin<sup>\*a</sup> and Thomas Scattolin<sup>\*c</sup>

#### TABLE OF CONTENTS

|                                                        |    |
|--------------------------------------------------------|----|
| NMR spectra .....                                      | 2  |
| IR spectra .....                                       | 29 |
| HRMS spectra.....                                      | 35 |
| X-ray diffraction analysis .....                       | 37 |
| Kinetic Study of the formation of dppbz complexes..... | 44 |

## NMR SPECTRA

1D NMR and 2D NMR spectrum were recorded on Bruker 300 or 400 Advance spectrometers. Chemical shifts values (ppm) are given relative to TMS ( $^1\text{H}$  and  $^{13}\text{C}$ ),  $\text{H}_3\text{PO}_4$  ( $^{31}\text{P}$ ) and  $\text{CCl}_3\text{F}$  ( $^{19}\text{F}$ ).

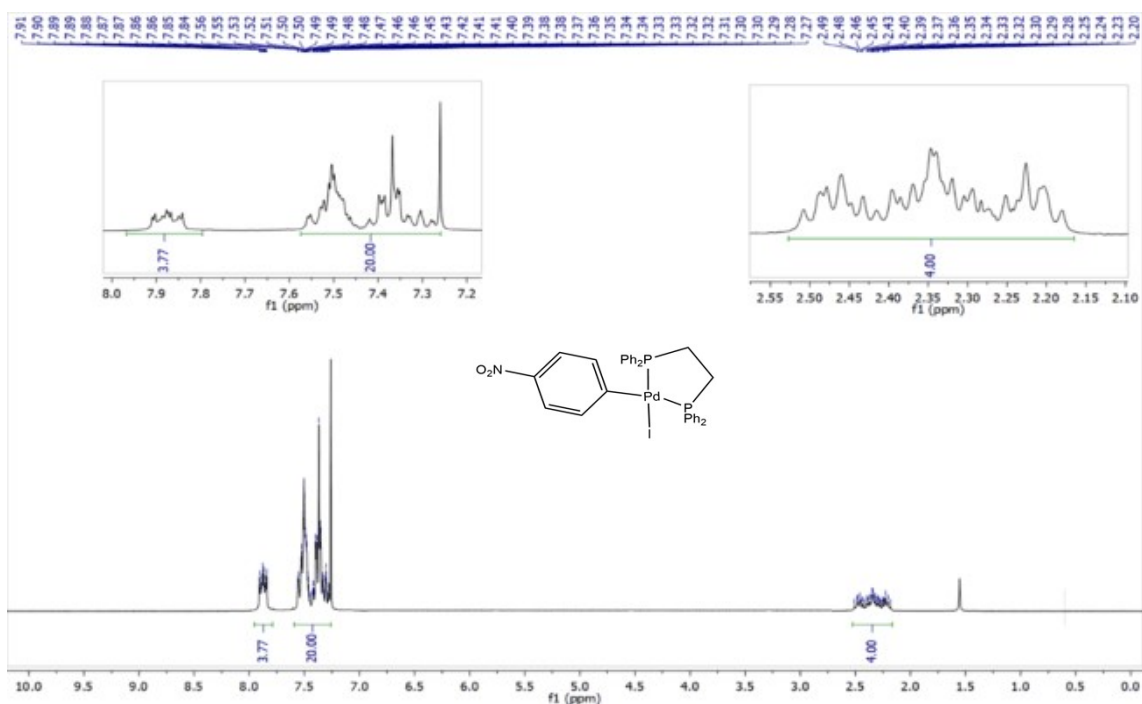

Figure S1.  $^1\text{H}$  NMR spectrum of **2a** in  $\text{CDCl}_3$  at 298 K.

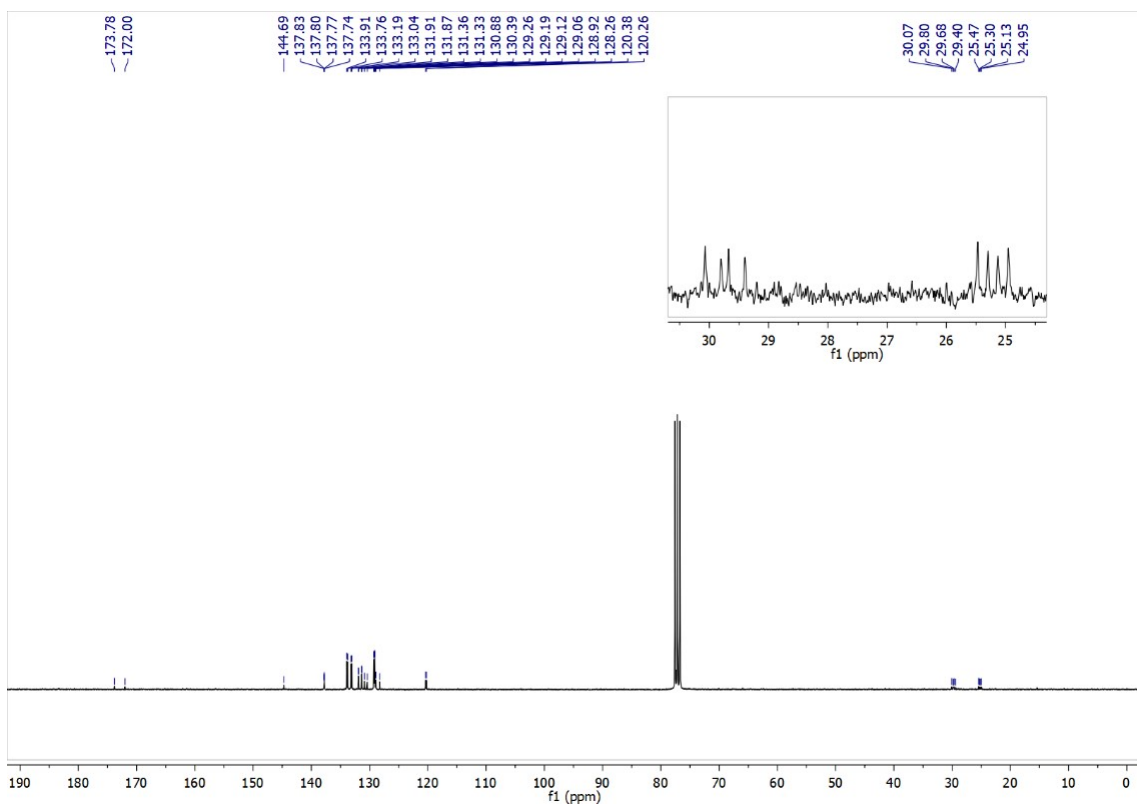

Figure S2.  $^{13}\text{C}\{^1\text{H}\}$  NMR spectrum of **2a** in  $\text{CDCl}_3$  at 298 K.

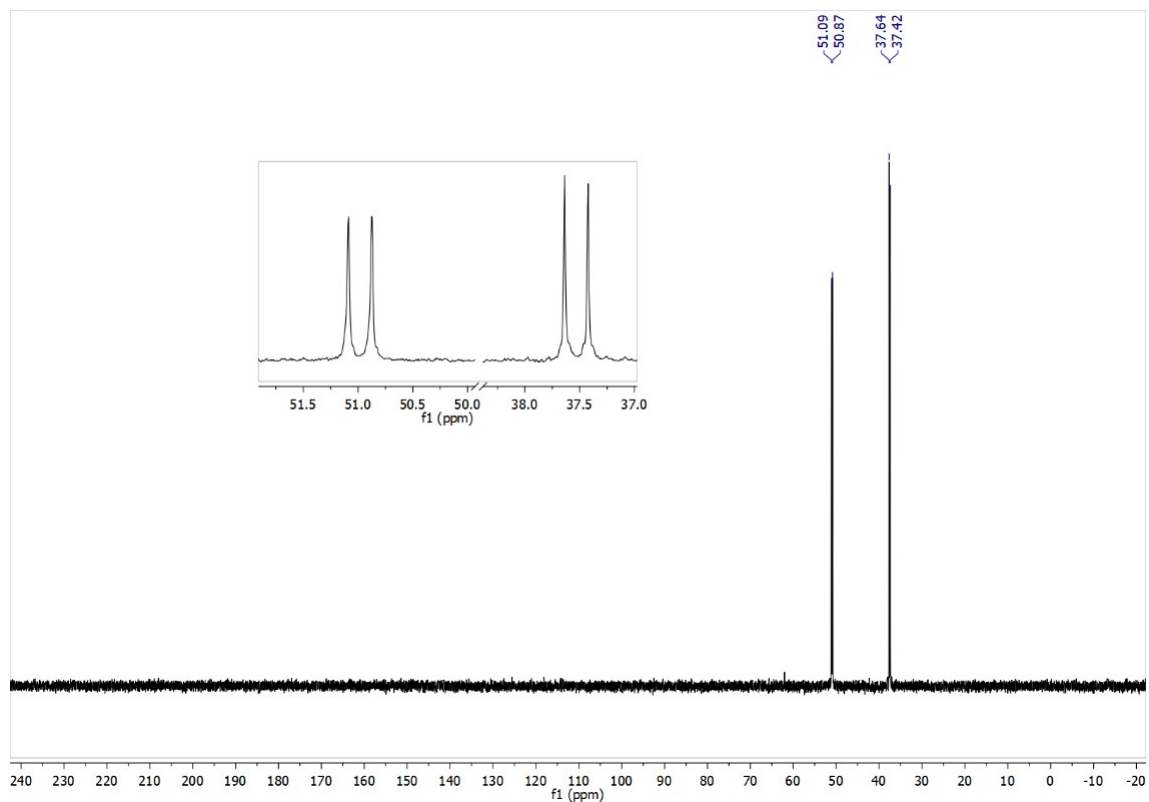

Figure S3. <sup>31</sup>P{<sup>1</sup>H} NMR spectrum of **2a** in CDCl<sub>3</sub> at 298 K

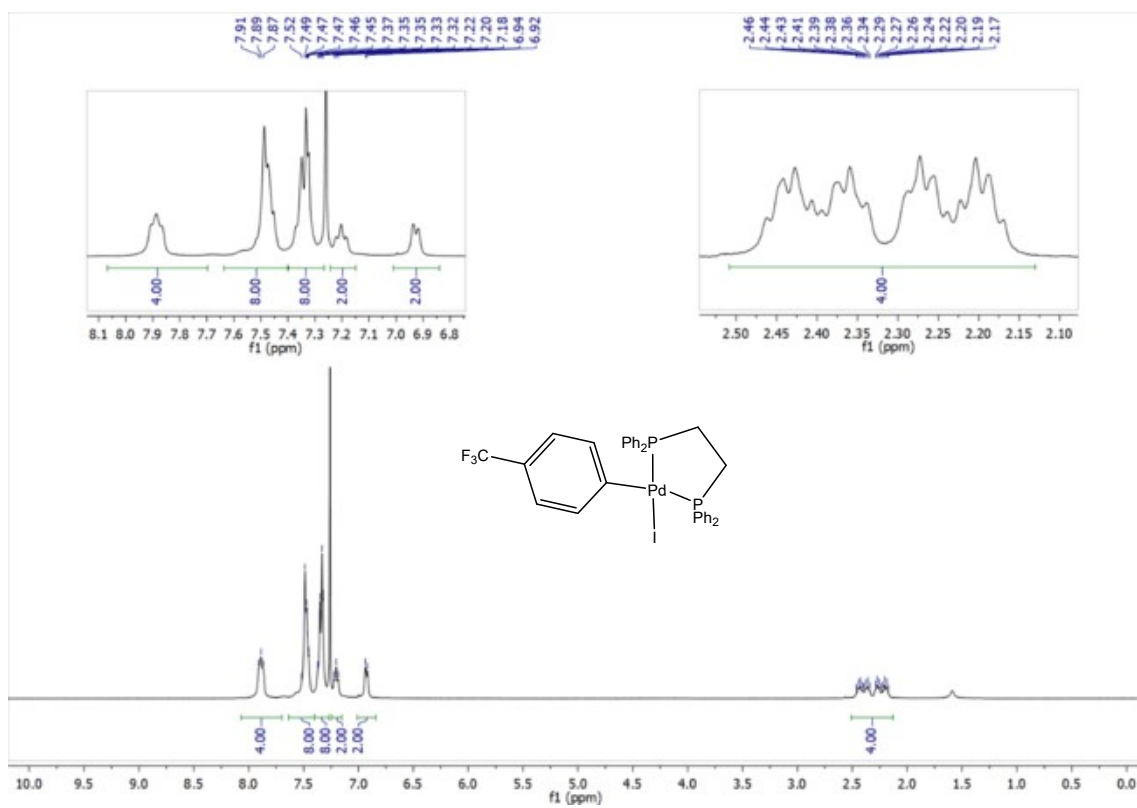

Figure S4. <sup>1</sup>H NMR spectrum of **2b** in CDCl<sub>3</sub> at 298 K.

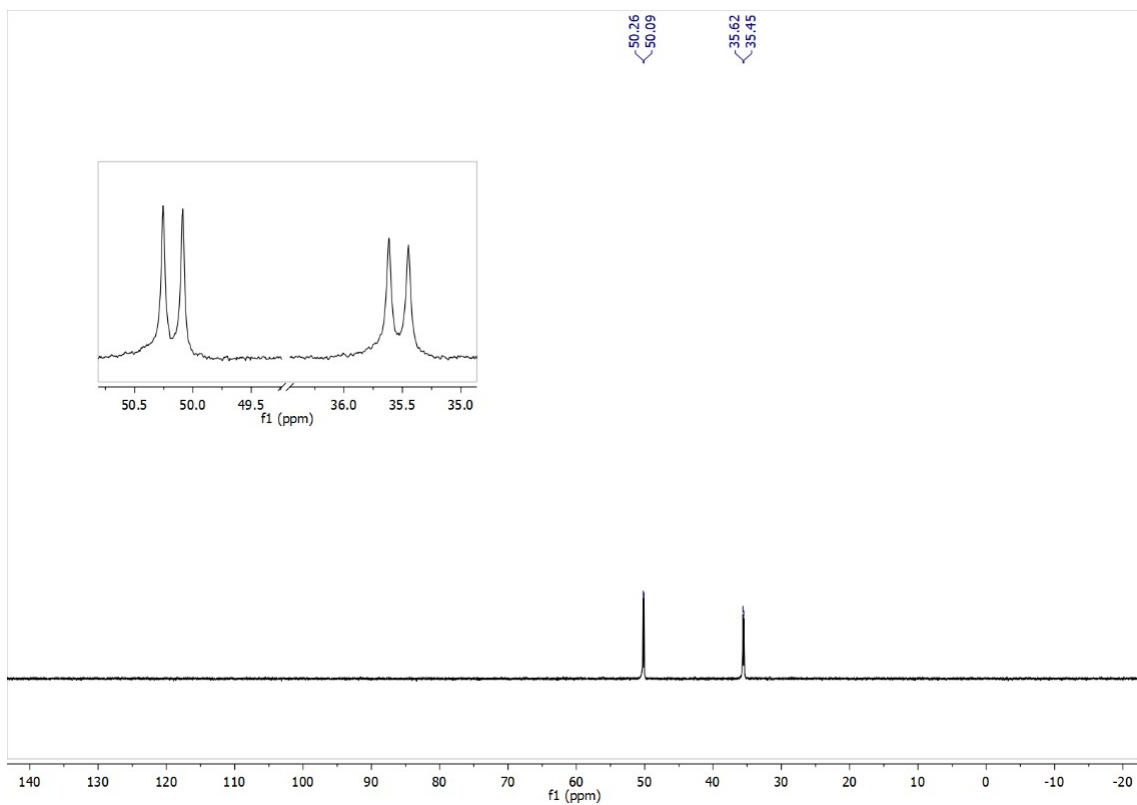

**Figure S5.**  $^{31}\text{P}\{^1\text{H}\}$  NMR spectrum of **2b** in  $\text{CDCl}_3$  at 298 K.

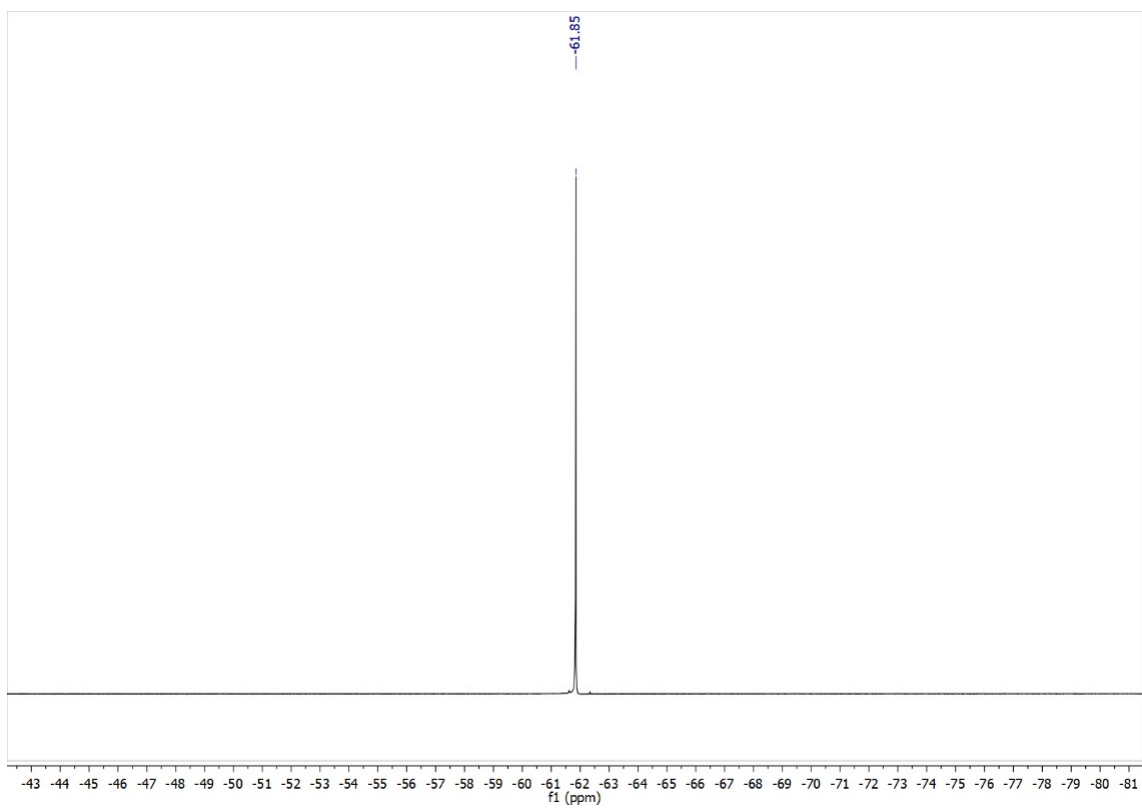

**Figure S6.**  $^{19}\text{F}\{^1\text{H}\}$  NMR spectrum of **2b** in  $\text{CDCl}_3$  at 298K.

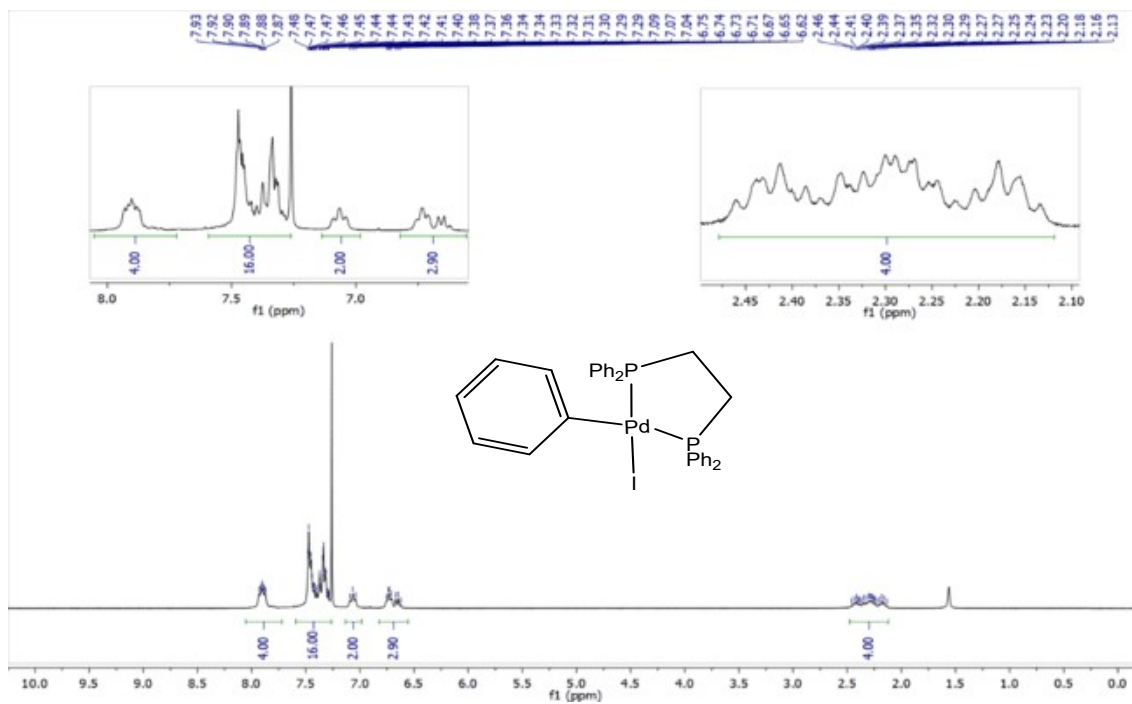

Figure S7.  $^1\text{H}$  NMR spectrum of **2c** in  $\text{CDCl}_3$  at 298 K.

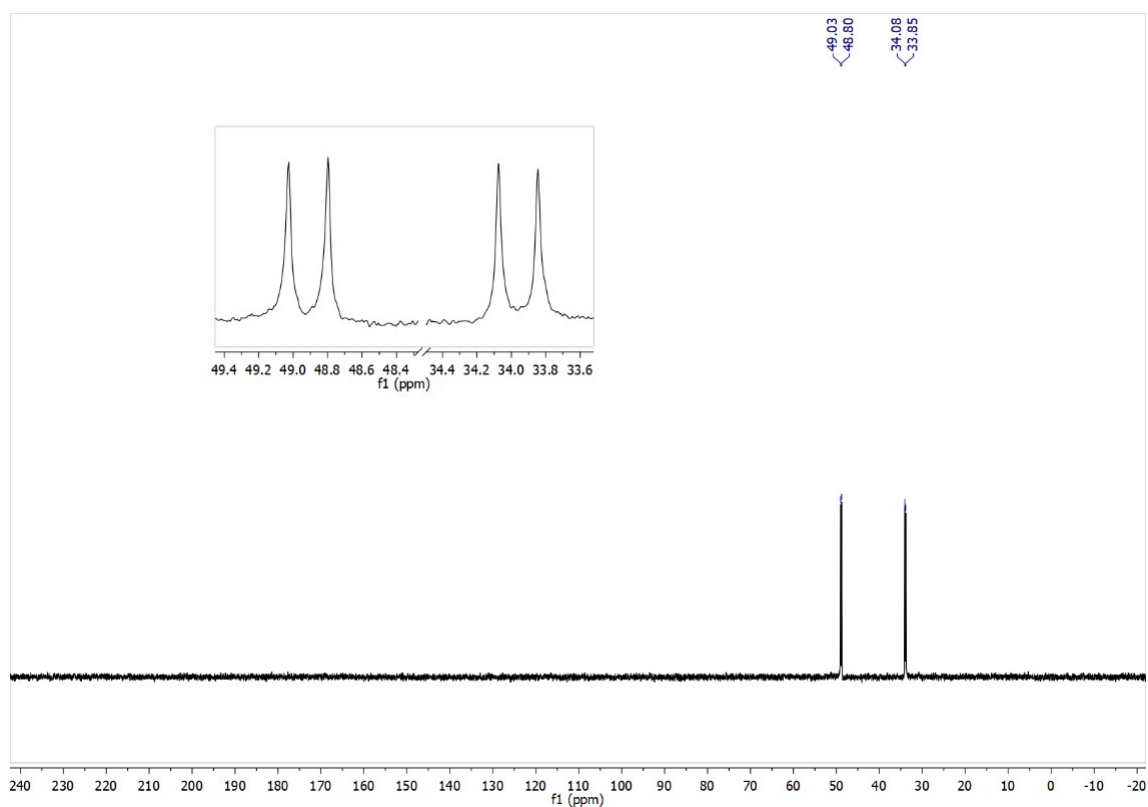

Figure S8.  $^{31}\text{P}\{^1\text{H}\}$  NMR spectrum of **2c** in  $\text{CDCl}_3$  at 298 K.

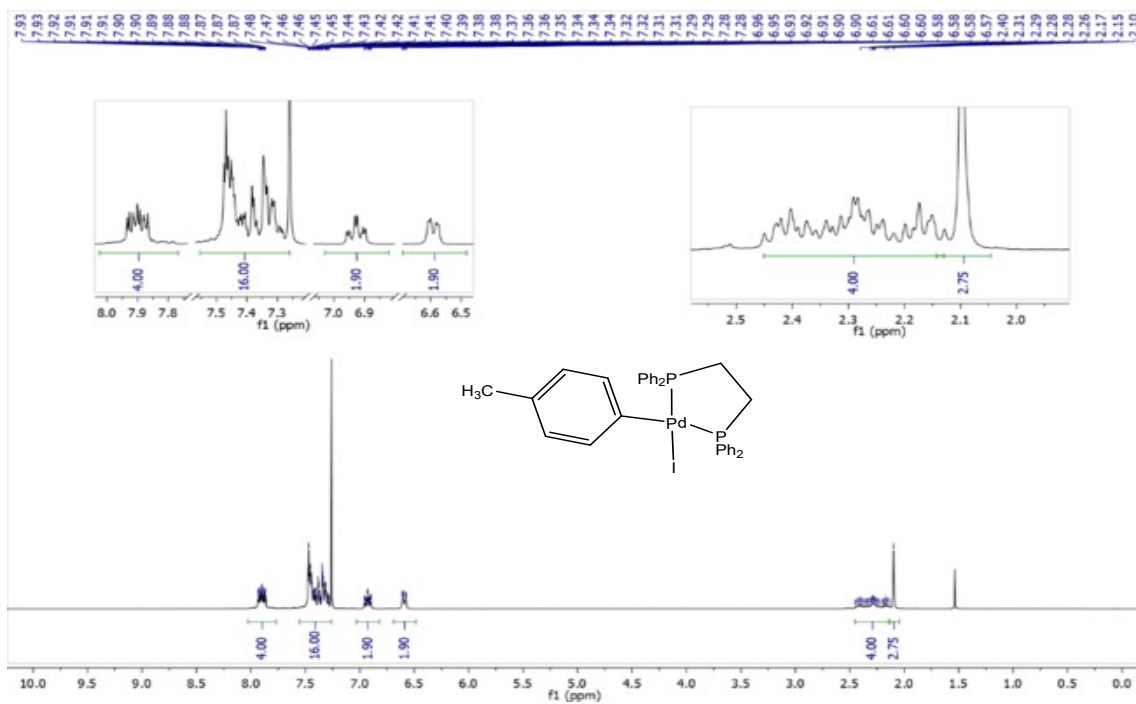

Figure S9.  $^1\text{H}$  NMR spectrum of **2d** in  $\text{CDCl}_3$  at 298 K.

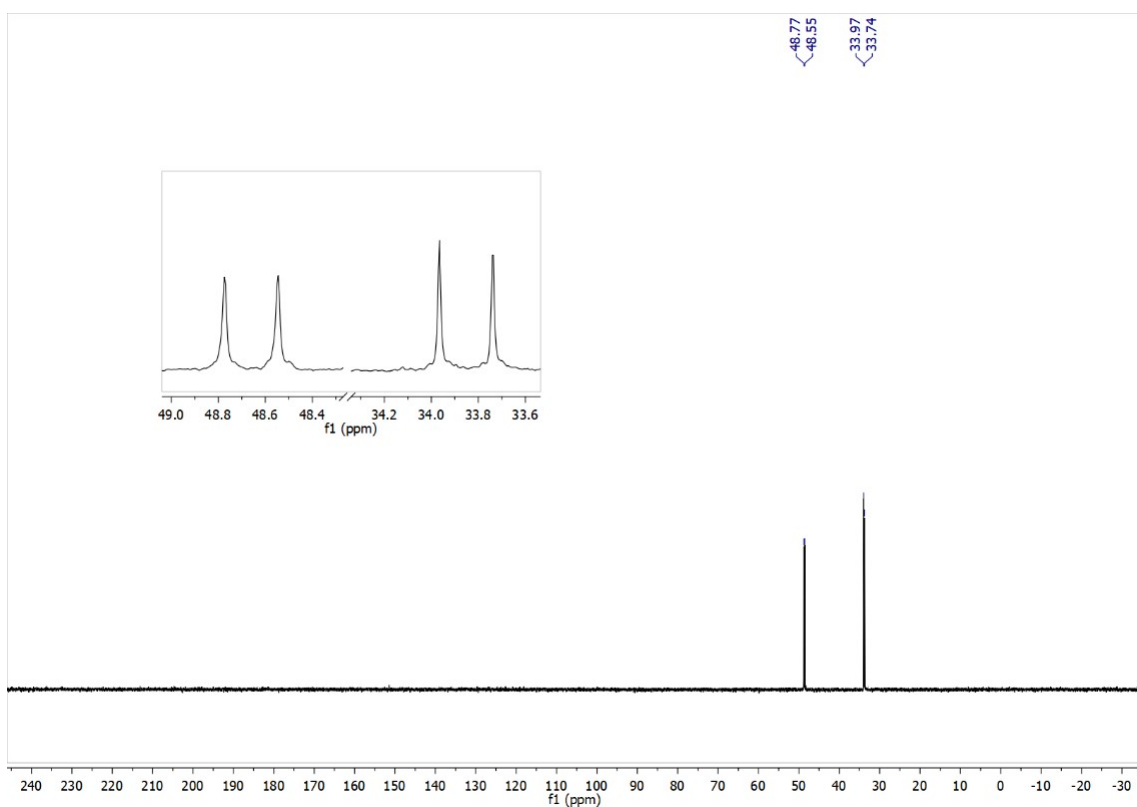

Figure S10.  $^{31}\text{P}\{^1\text{H}\}$  NMR spectrum of **2d** in  $\text{CDCl}_3$  at 298 K.

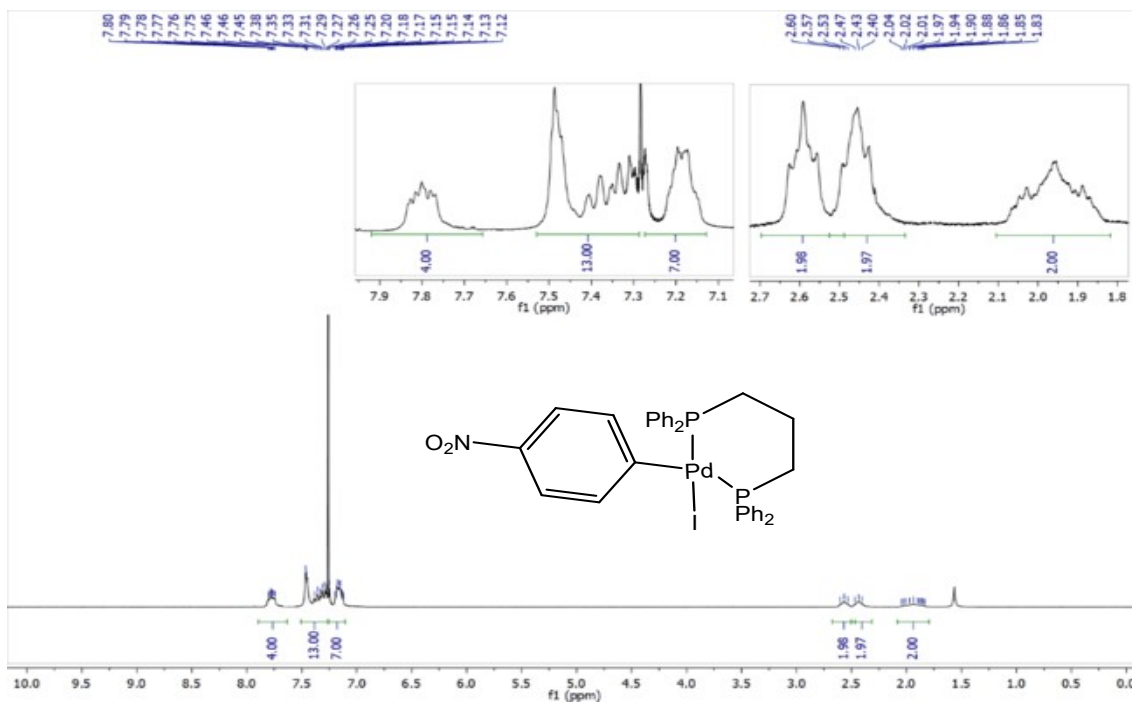

Figure S11.  $^1\text{H}$  NMR spectrum of **3a** in  $\text{CDCl}_3$  at 298 K.

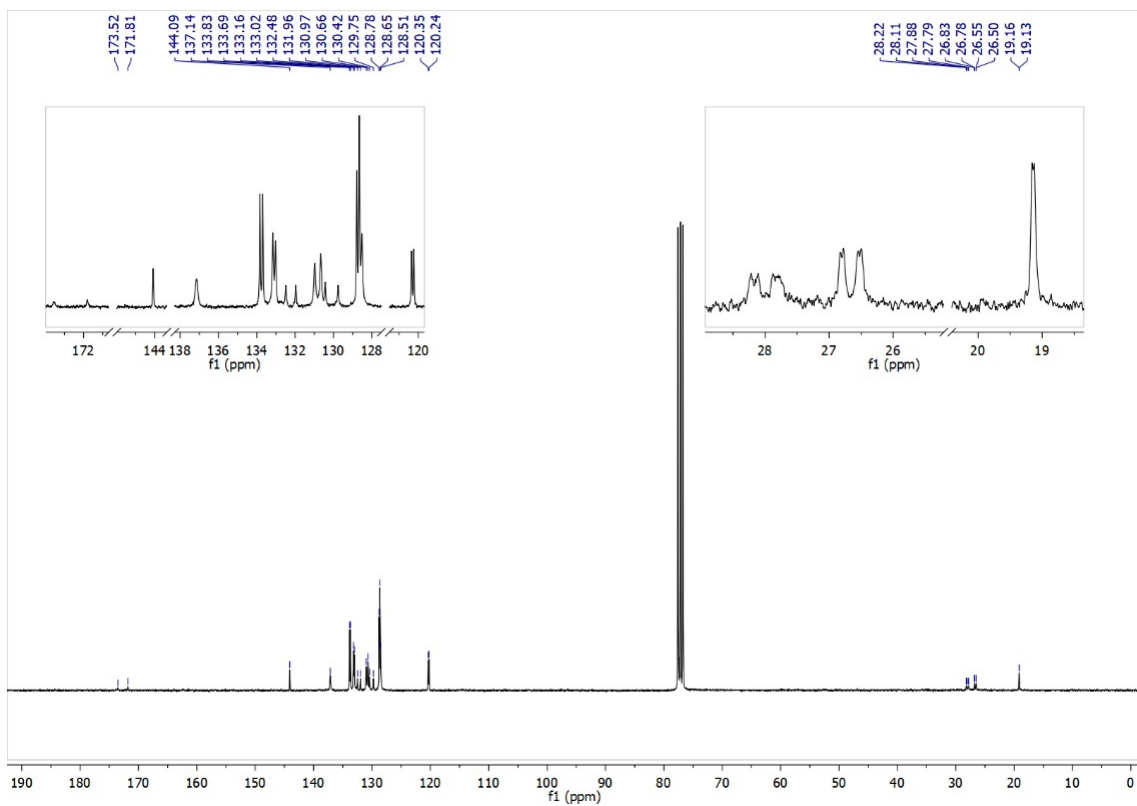

Figure S12.  $^{13}\text{C}\{^1\text{H}\}$  NMR spectrum of **3a** in  $\text{CDCl}_3$  at 298 K.

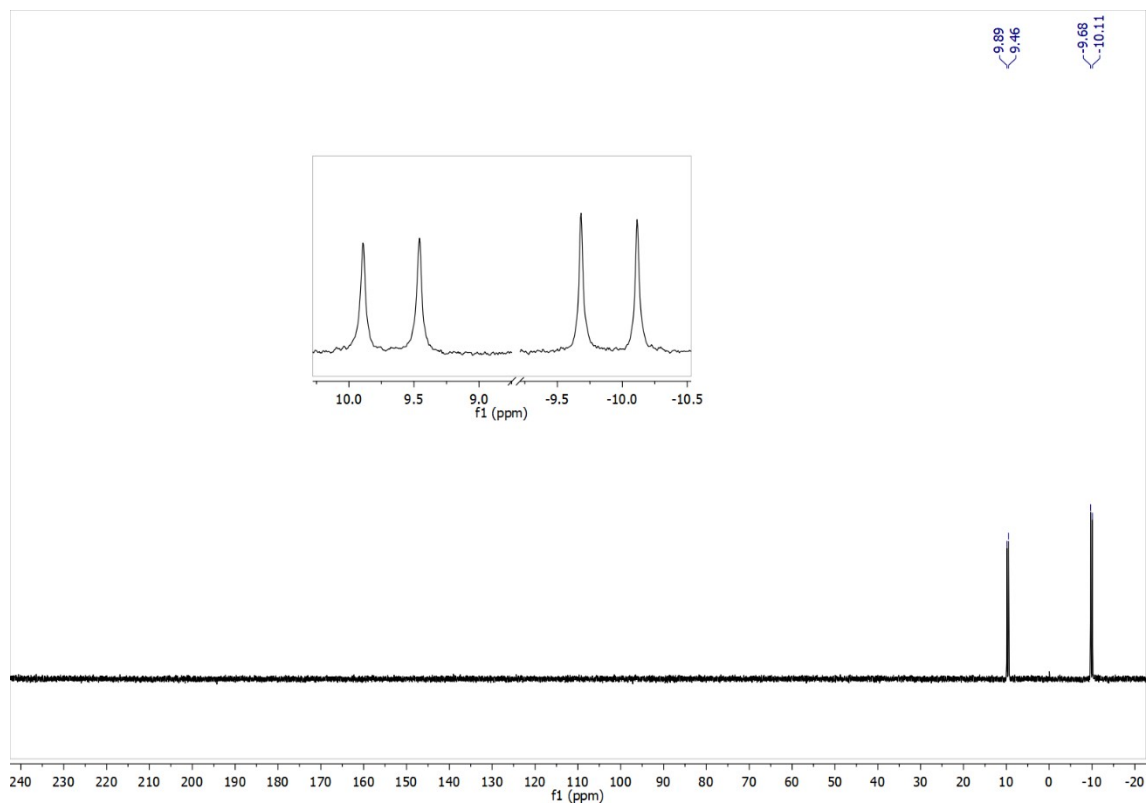

Figure S13.  $^{31}\text{P}\{^1\text{H}\}$  NMR spectrum of **3a** in  $\text{CDCl}_3$  at 298 K.

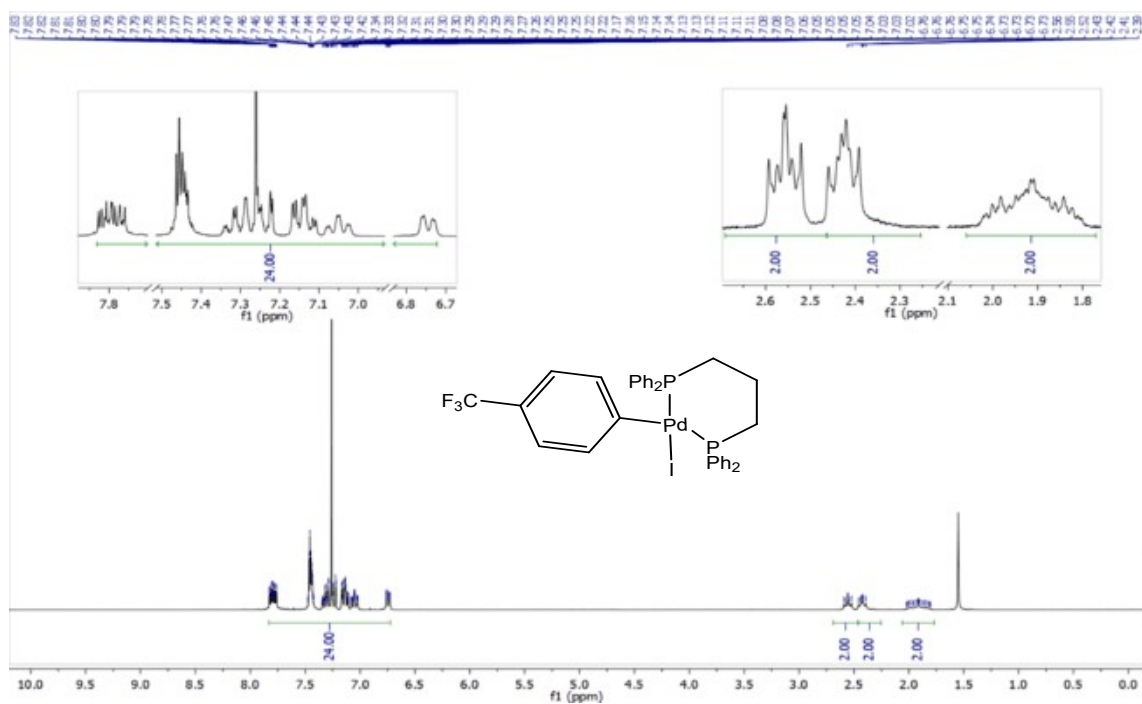

Figure S14.  $^1\text{H}$  NMR spectrum of **3b** in  $\text{CDCl}_3$  at 298 K.



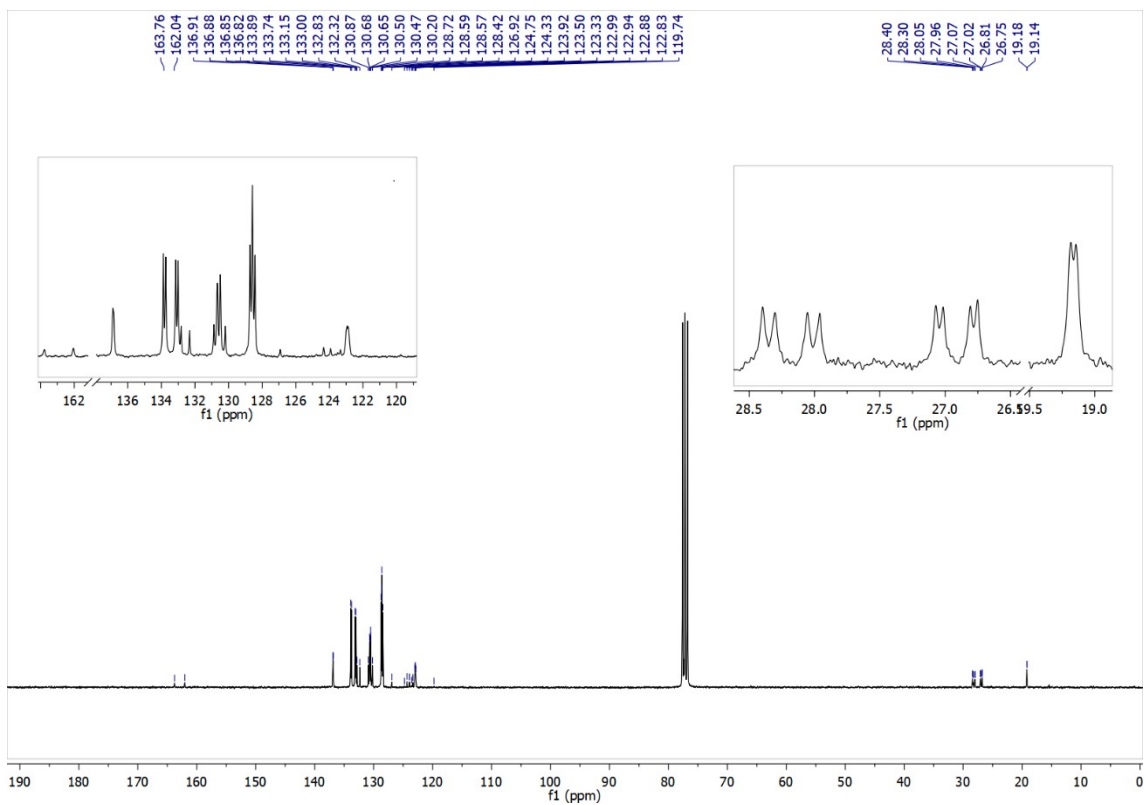

Figure S15.  $^{13}\text{C}\{^1\text{H}\}$  NMR spectrum of **3b** in  $\text{CDCl}_3$  at 298 K.

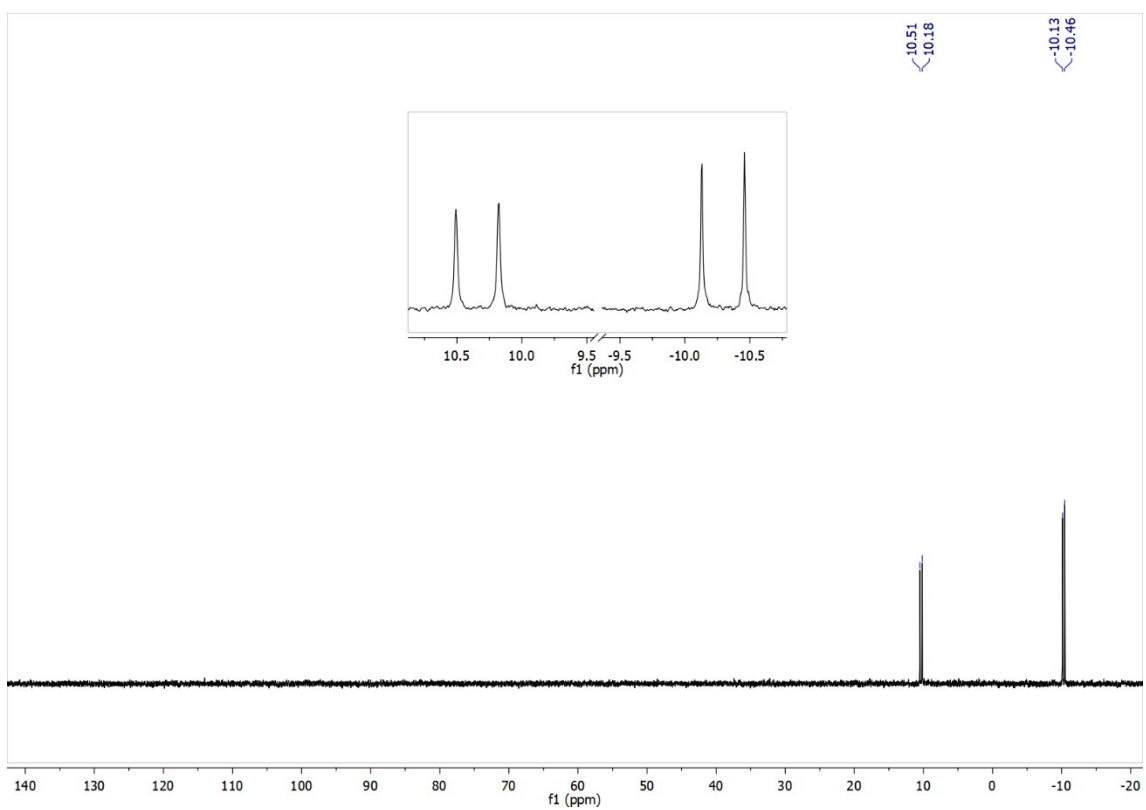

Figure S16.  $^{31}\text{P}\{^1\text{H}\}$  NMR spectrum of **3b** in  $\text{CDCl}_3$  at 298 K.

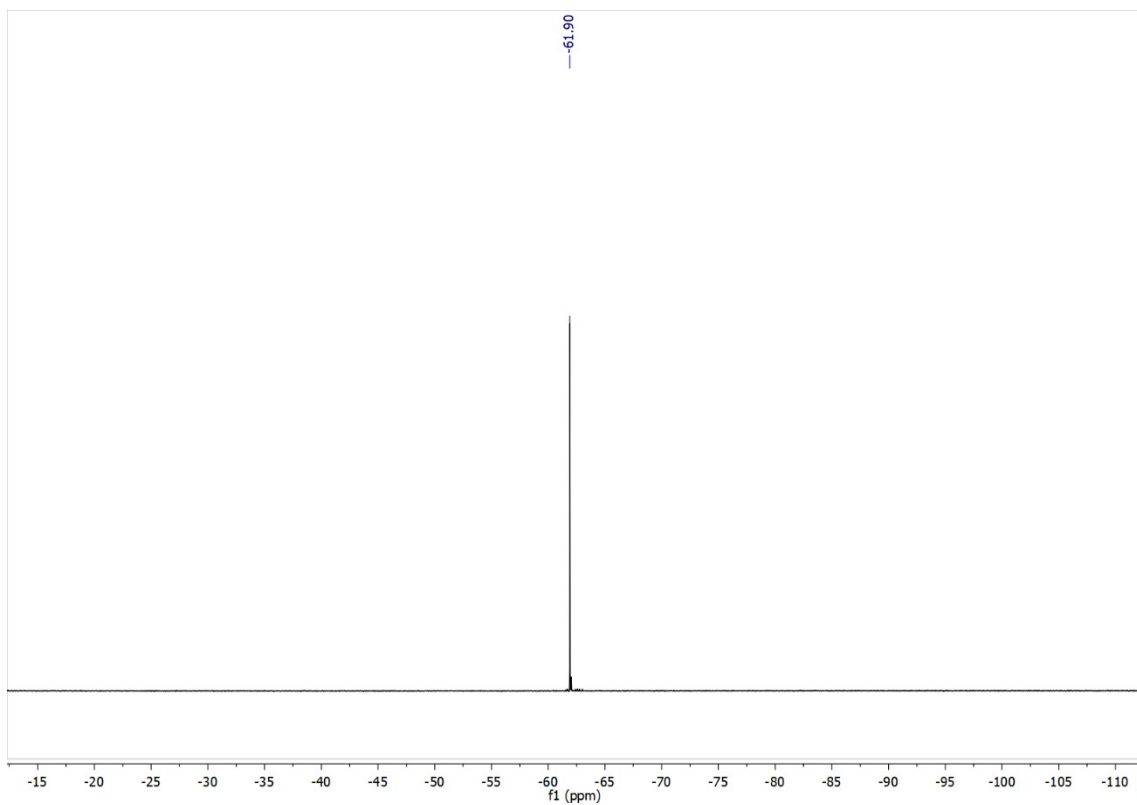

Figure S17.  $^{19}\text{F}\{^1\text{H}\}$  NMR spectrum of **3b** in  $\text{CDCl}_3$  at 298K.

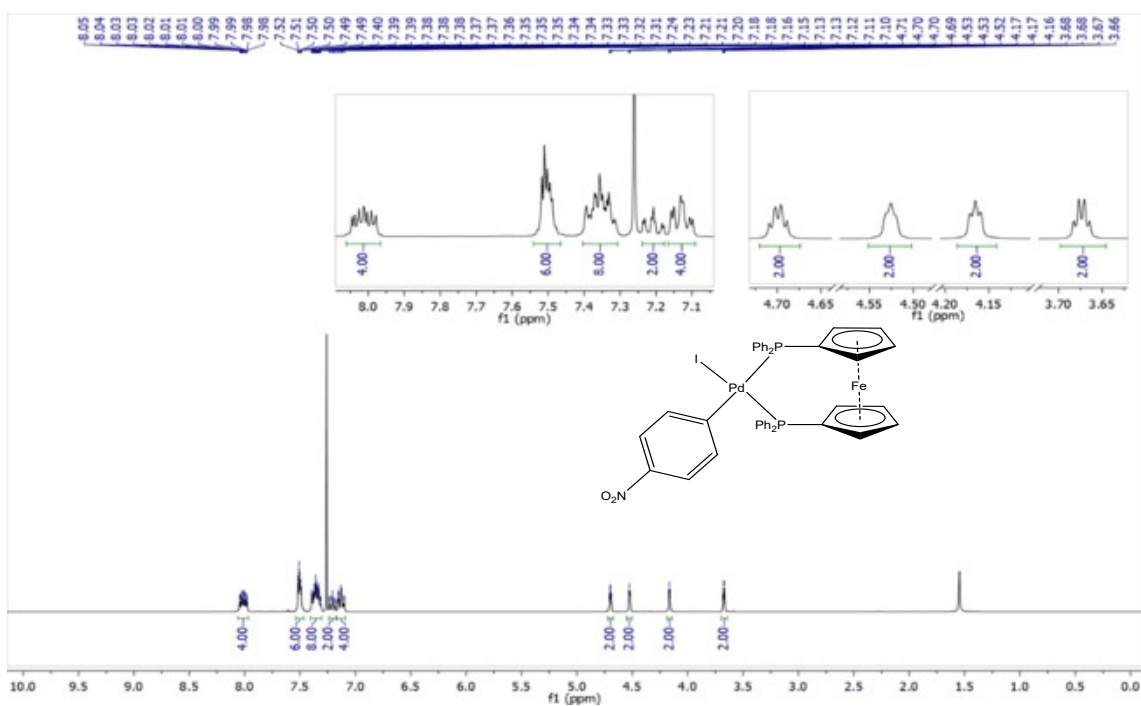

Figure S18.  $^1\text{H}$  NMR spectrum of **4a** in  $\text{CDCl}_3$  at 298 K.

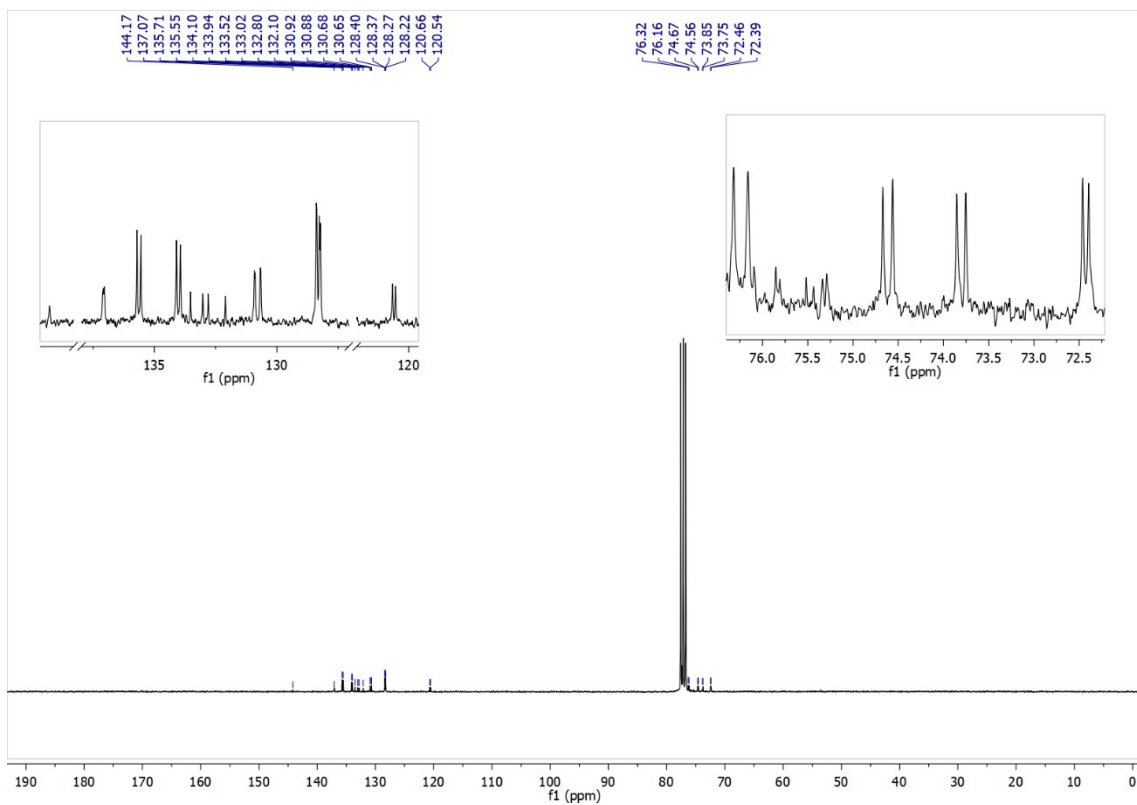

Figure S19.  $^{13}\text{C}\{^1\text{H}\}$  NMR spectrum of **4a** in  $\text{CDCl}_3$  at 298 K.

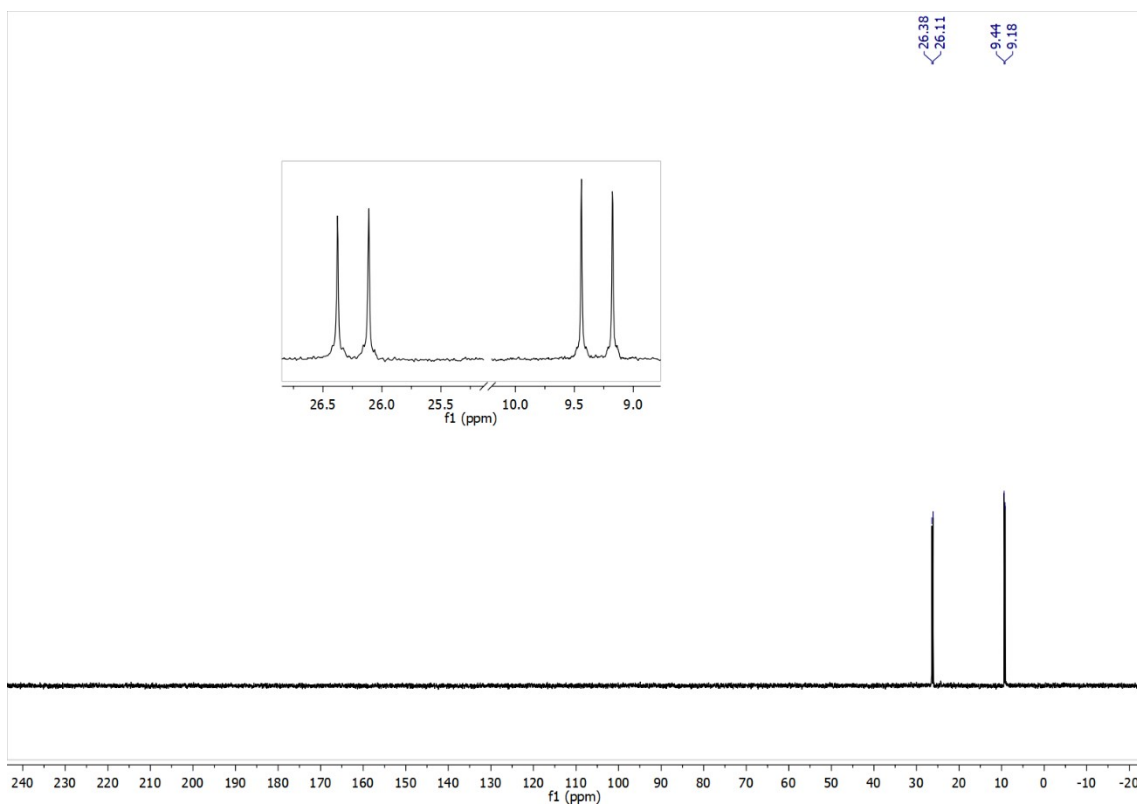

Figure S20.  $^{31}\text{P}\{^1\text{H}\}$  NMR spectrum of **4a** in  $\text{CDCl}_3$  at 298 K.

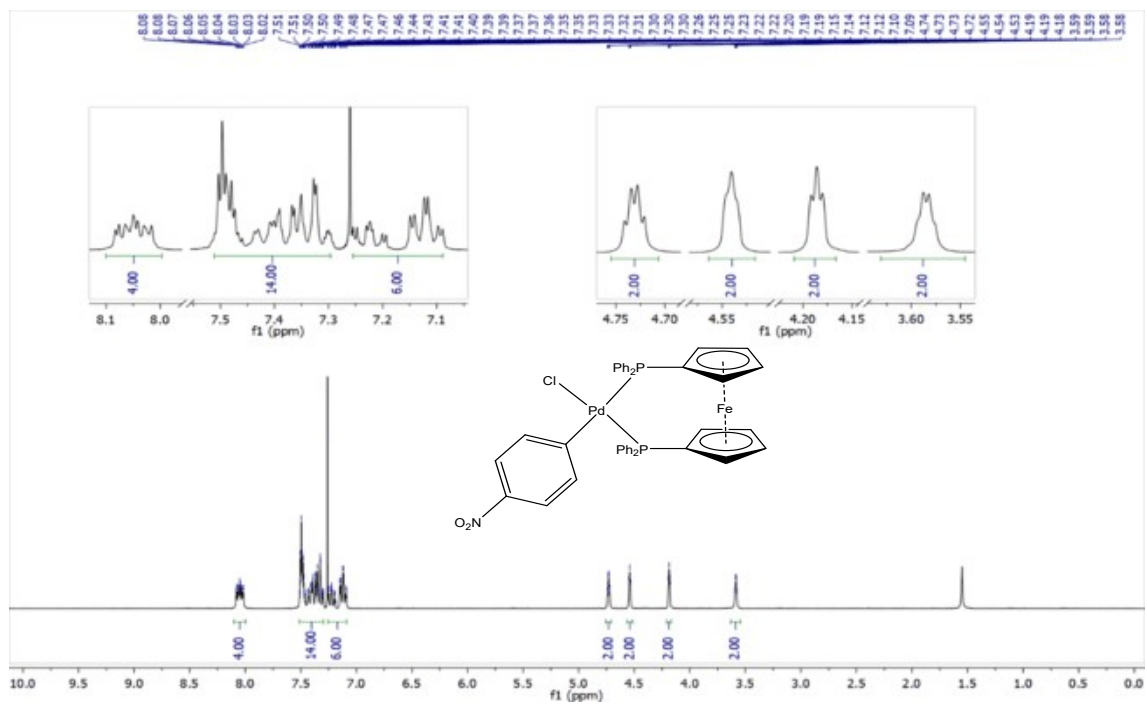

Figure S21. <sup>1</sup>H NMR spectrum of 4a-Cl in CDCl<sub>3</sub> at 298 K.

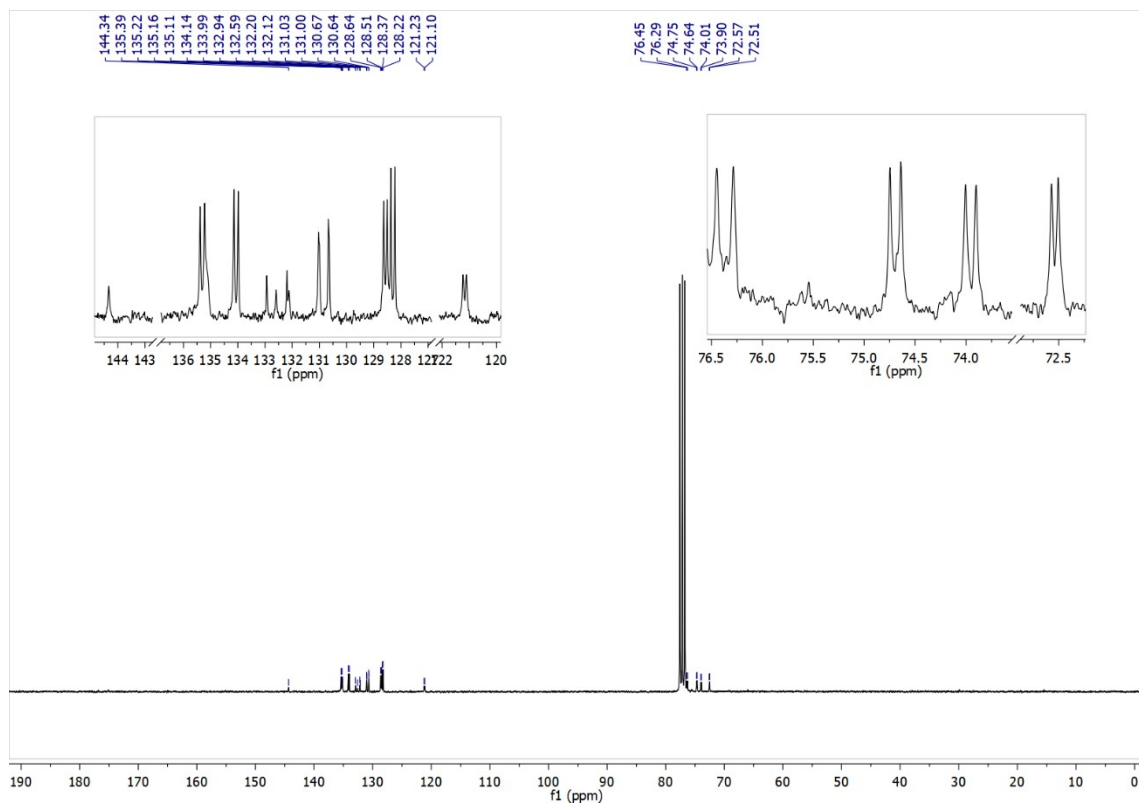

Figure S22. <sup>13</sup>C{<sup>1</sup>H} NMR spectrum of 4a-Cl in CDCl<sub>3</sub> at 298 K.

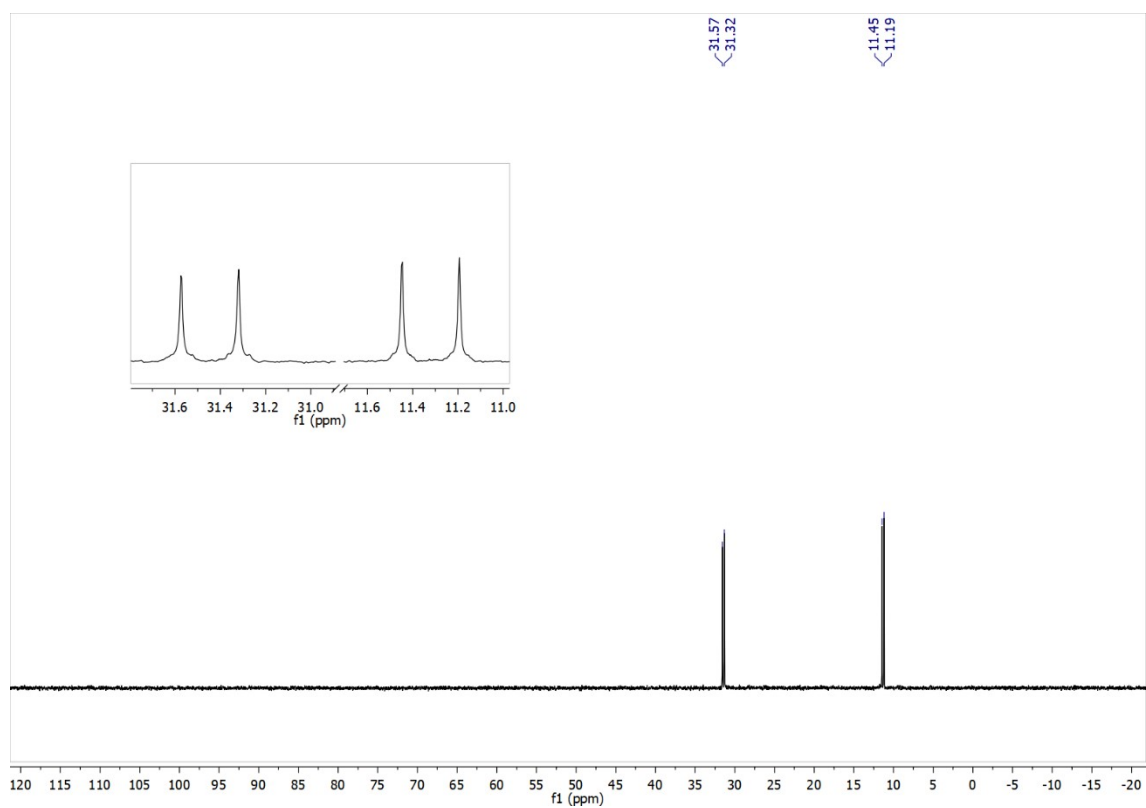

Figure S23.  $^{31}\text{P}\{^1\text{H}\}$  NMR spectrum of **4a-Cl** in  $\text{CDCl}_3$  at 298 K.

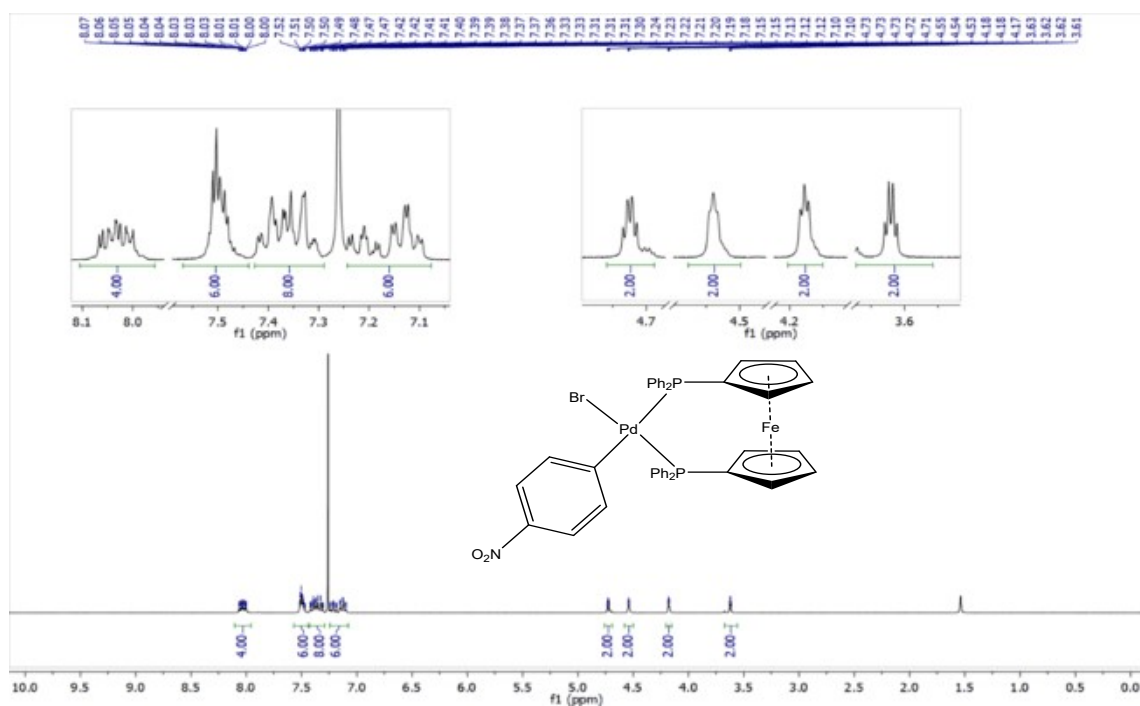

Figure S24.  $^1\text{H}$  NMR spectrum of **4a-Br** in  $\text{CDCl}_3$  at 298 K.

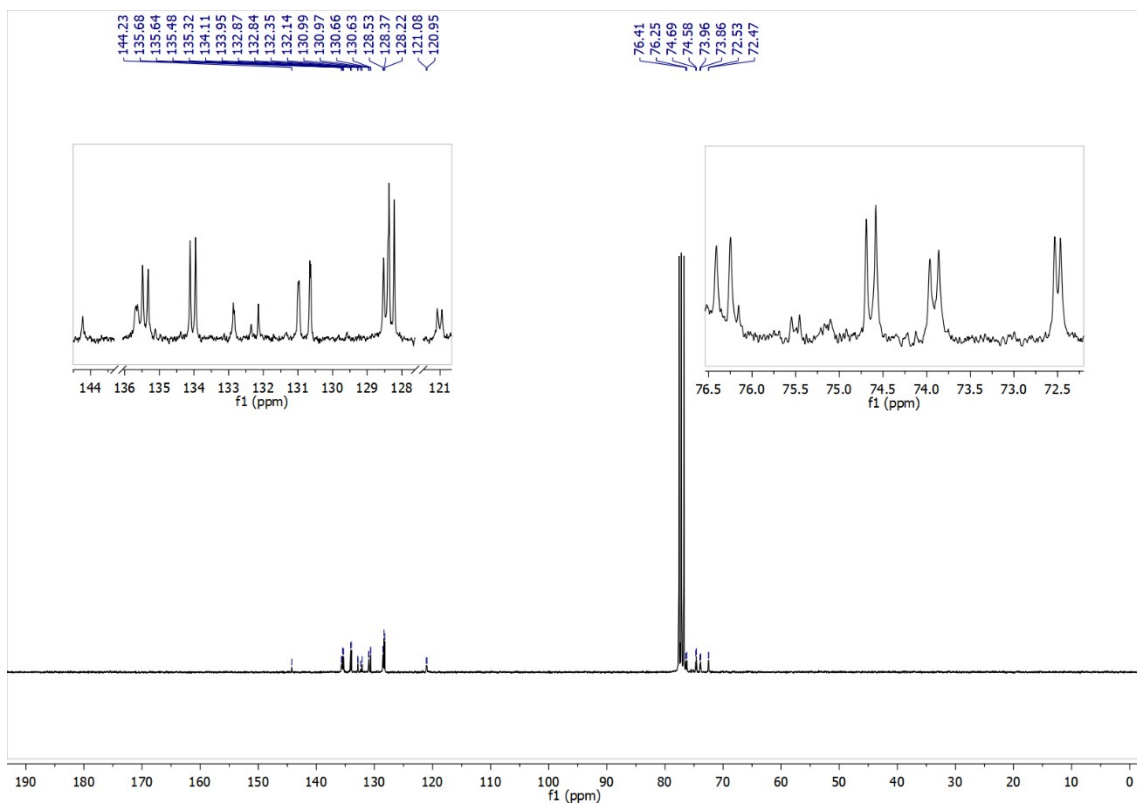

Figure S25.  $^{13}\text{C}\{^1\text{H}\}$  NMR spectrum of **4a-Br** in  $\text{CDCl}_3$  at 298 K.

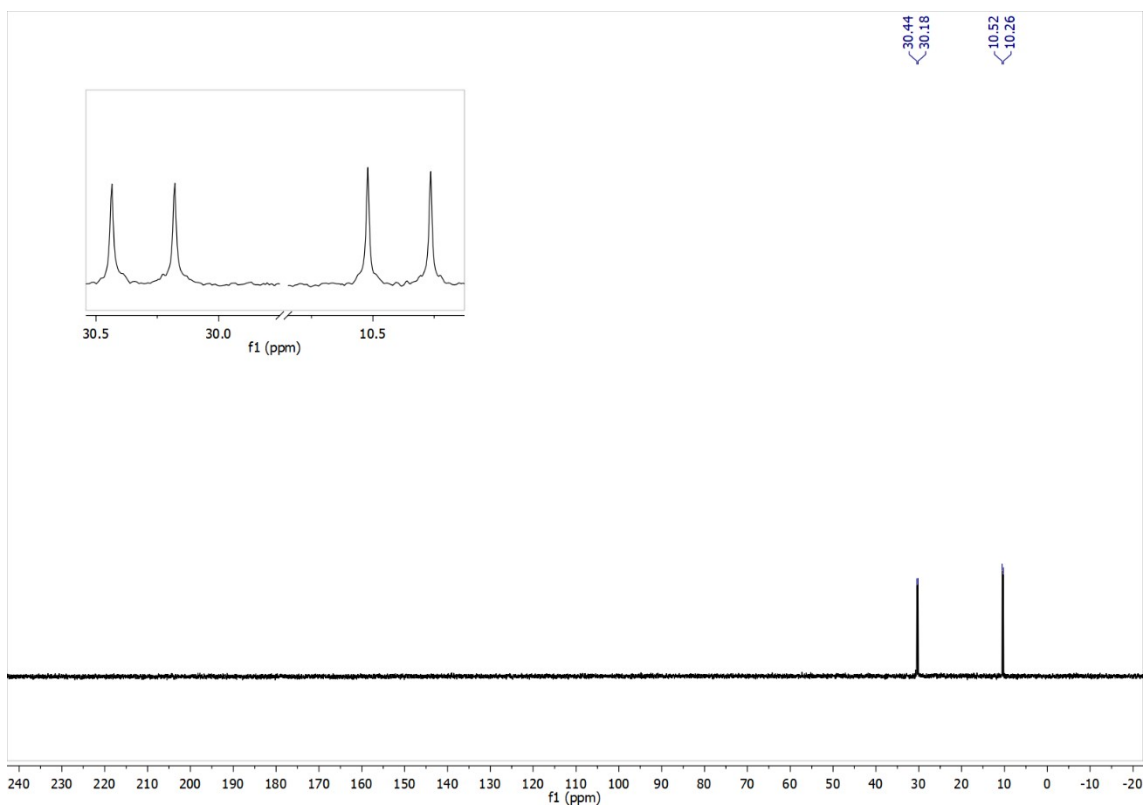

Figure S26.  $^{31}\text{P}\{^1\text{H}\}$  NMR spectrum of **4a-Br** in  $\text{CDCl}_3$  at 298 K.

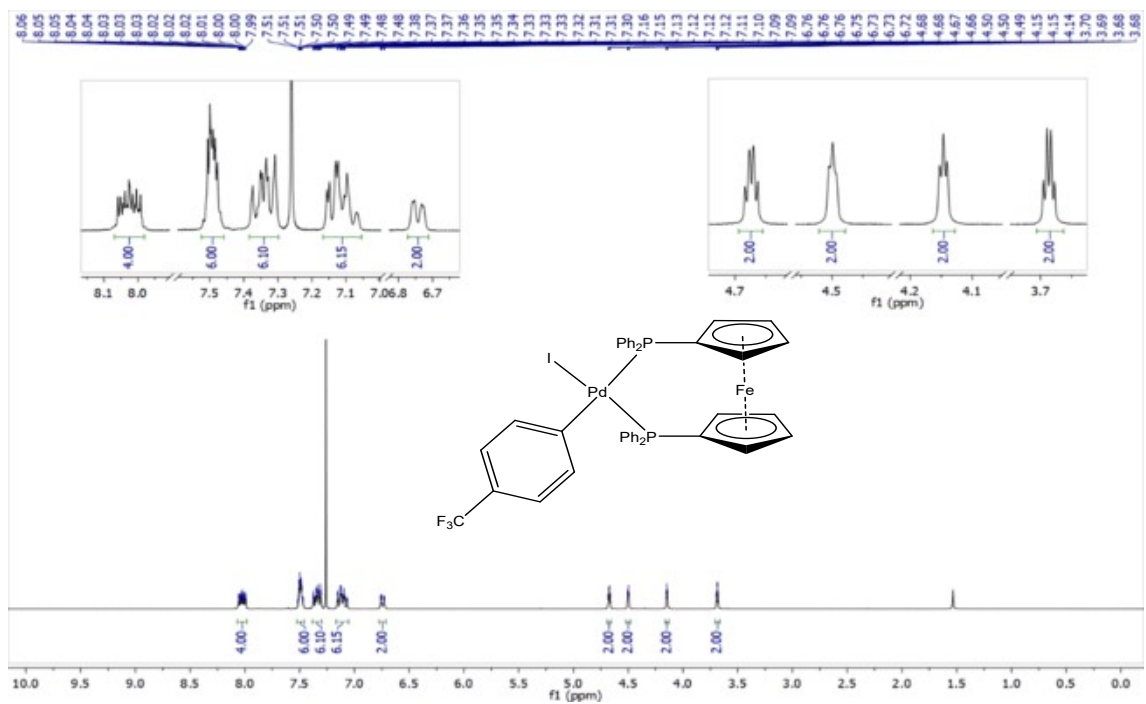

Figure S27.  $^1\text{H NMR}$  spectrum of **4b** in  $\text{CDCl}_3$  at 298 K.

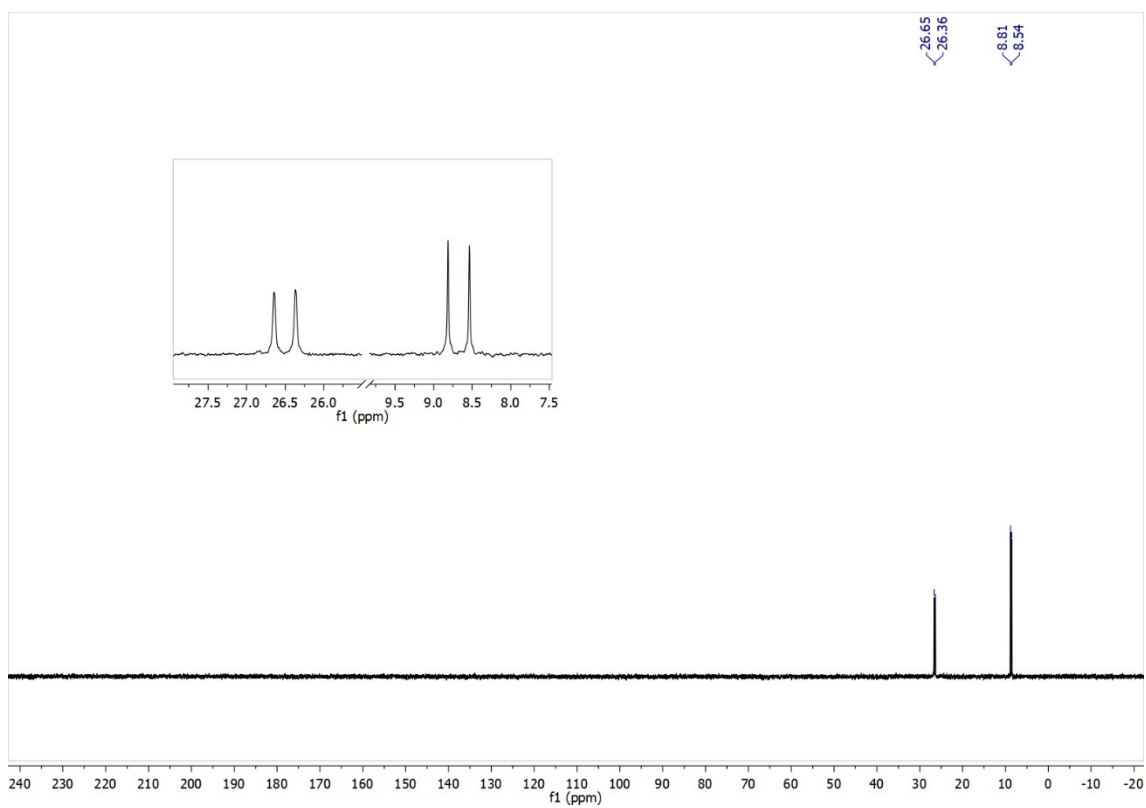

Figure S28.  $^{31}\text{P}\{^1\text{H}\}$  NMR spectrum of **4b** in  $\text{CDCl}_3$  at 298 K.

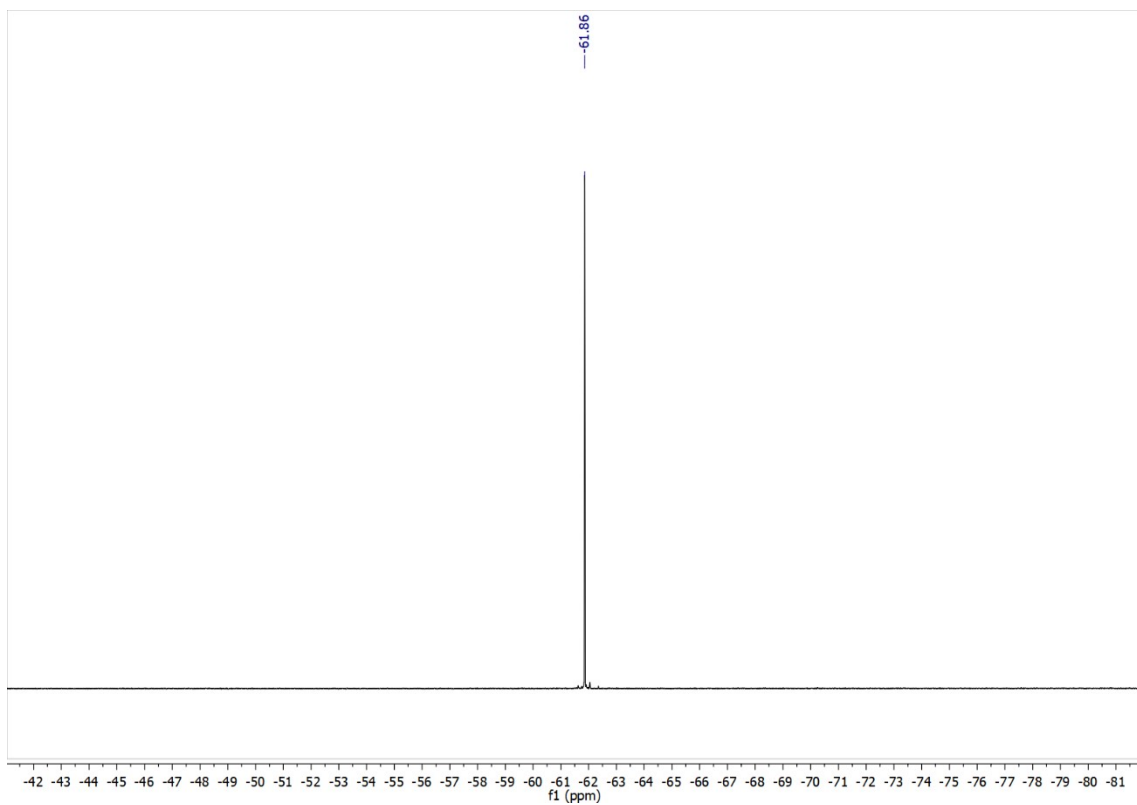

Figure S29.  $^{19}\text{F}\{^1\text{H}\}$  NMR spectrum of **4b** in  $\text{CDCl}_3$  at 298K.

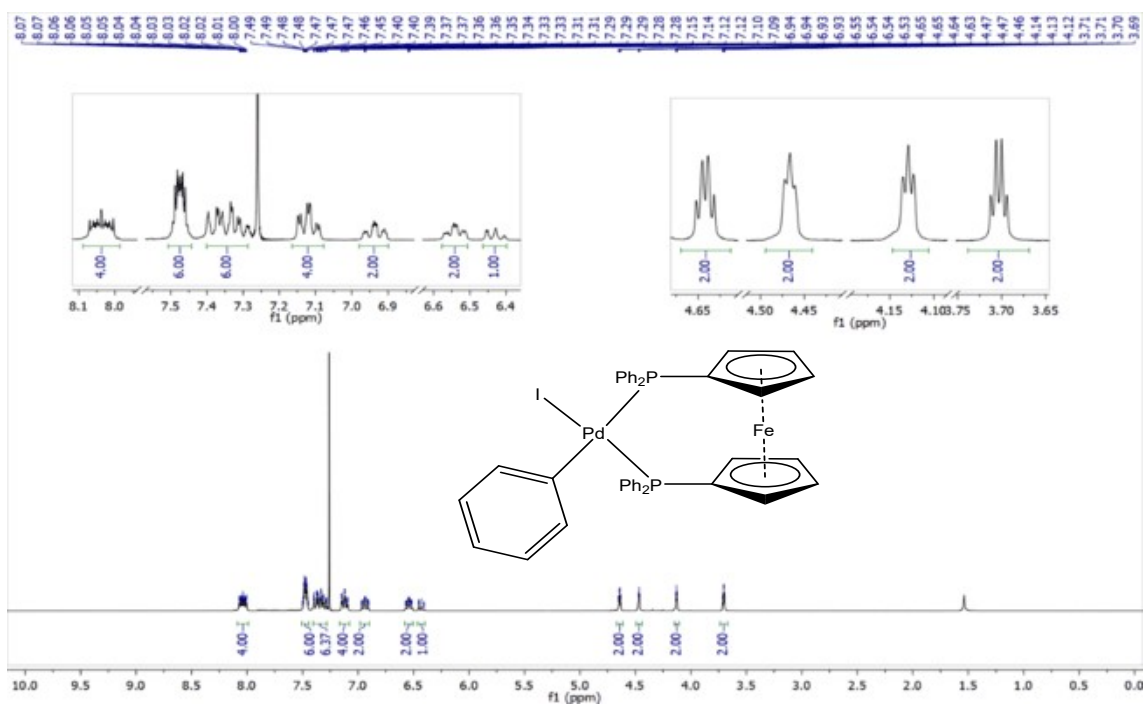

Figure S30.  $^1\text{H}$  NMR spectrum of **4c** in  $\text{CDCl}_3$  at 298 K.



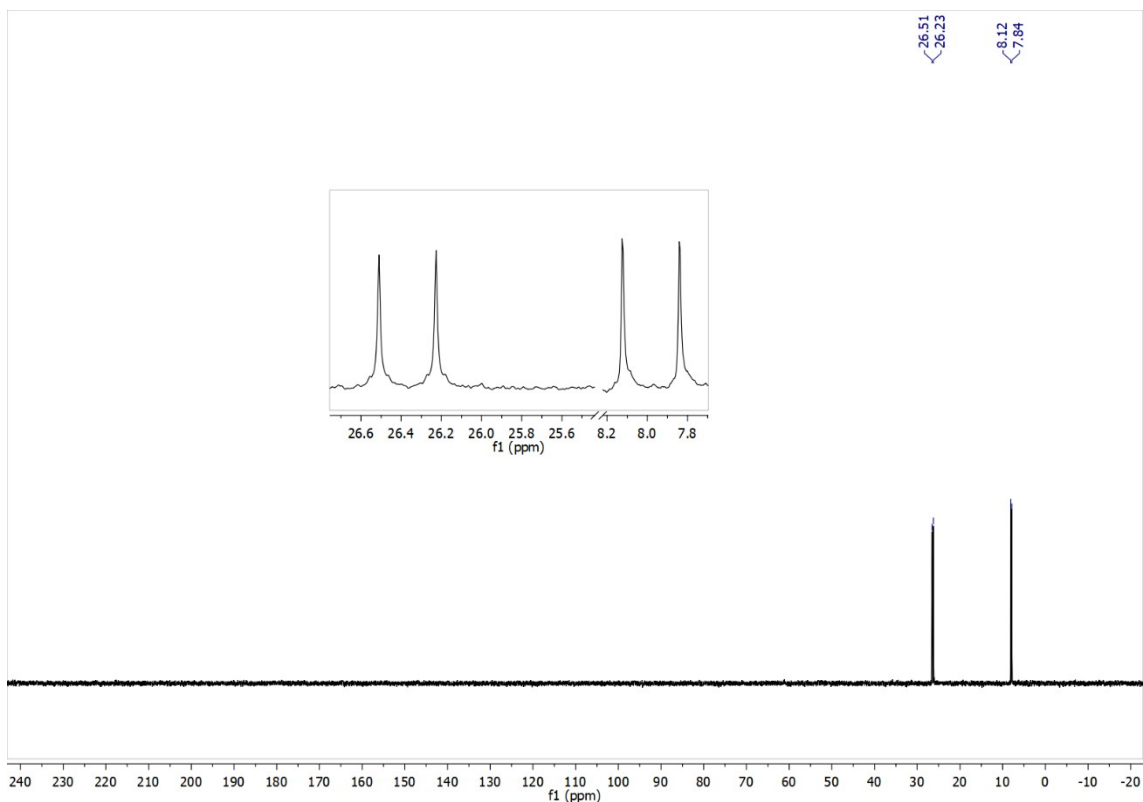

Figure S31.  $^{31}\text{P}\{^1\text{H}\}$  NMR spectrum of **4c** in  $\text{CDCl}_3$  at 298 K.

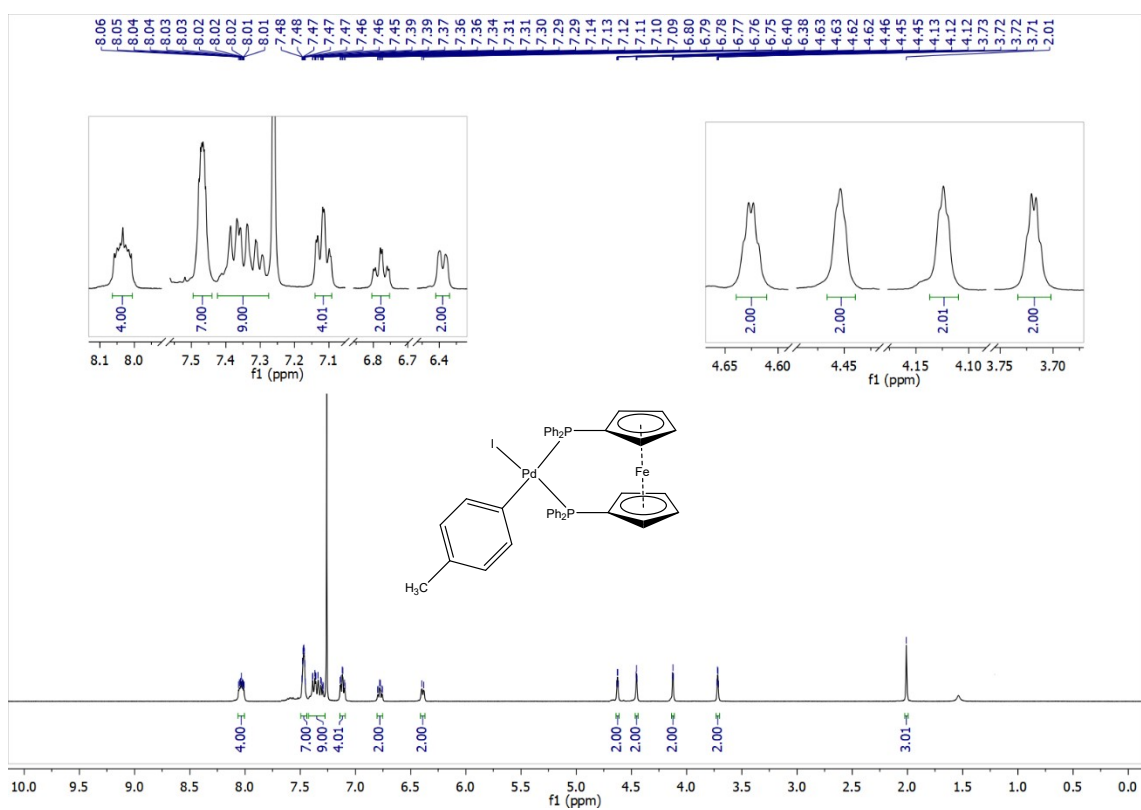

Figure S32.  $^1\text{H}$  NMR spectrum of **4d** in  $\text{CDCl}_3$  at 298 K.

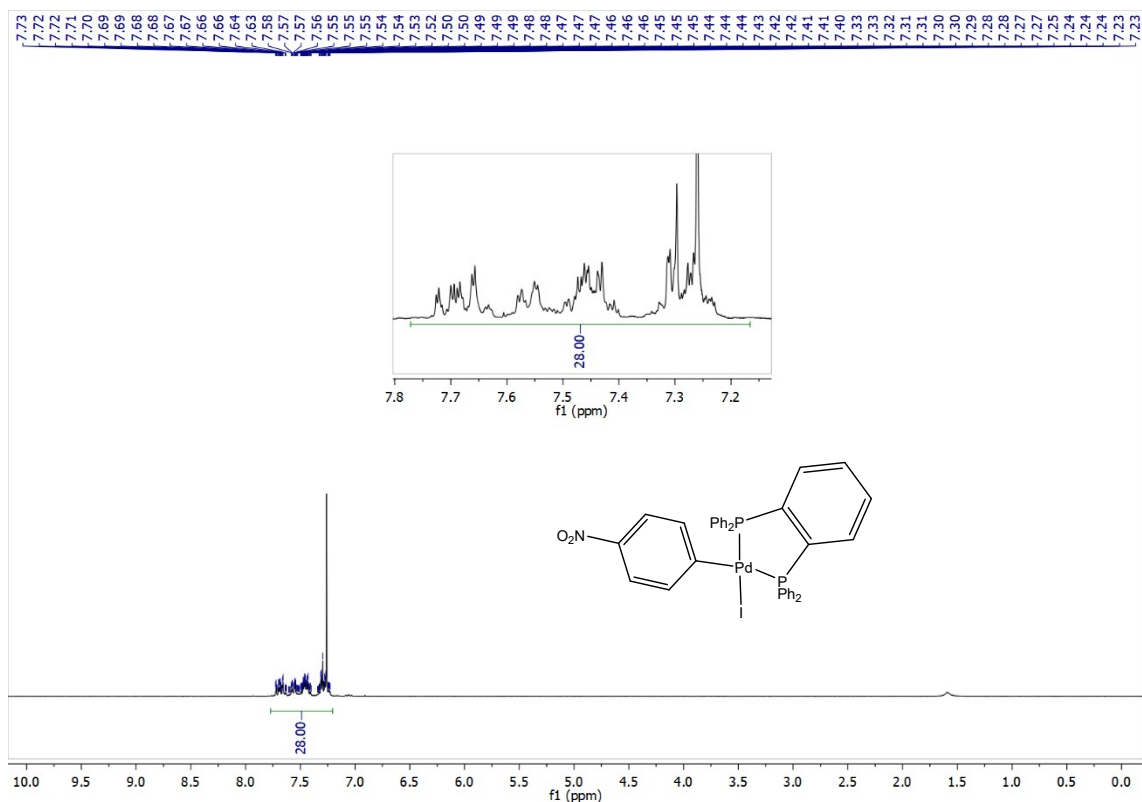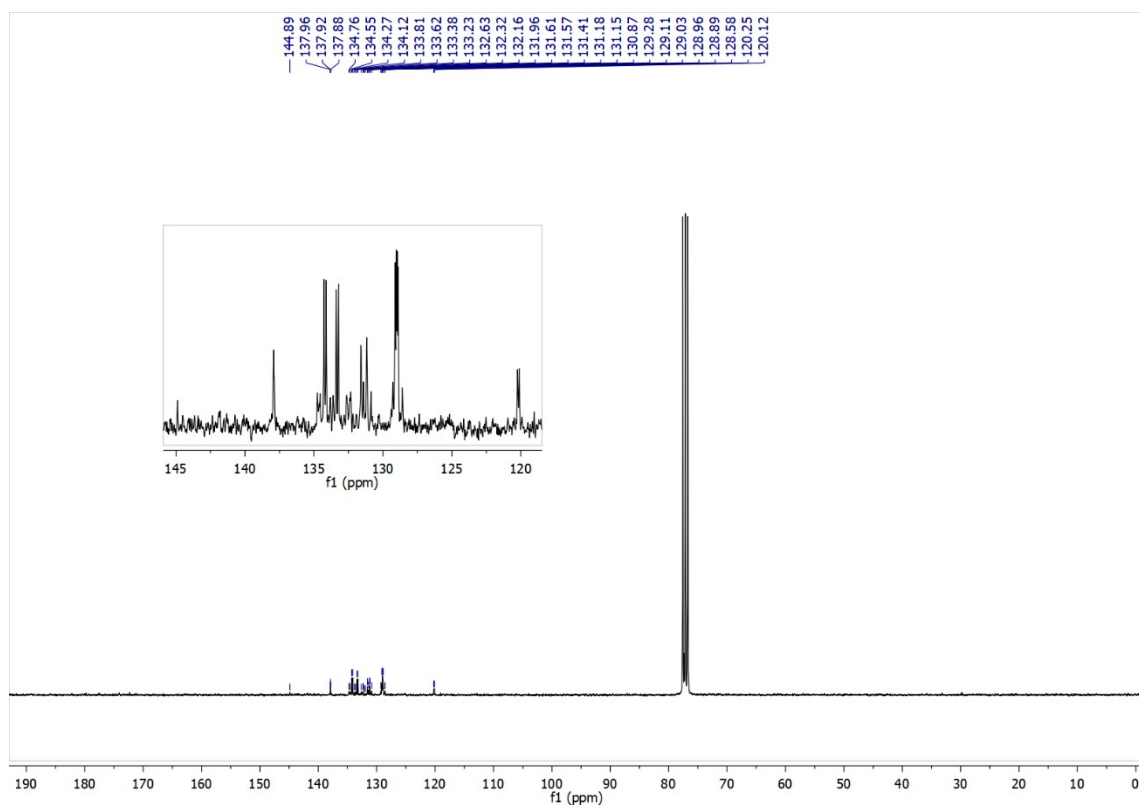

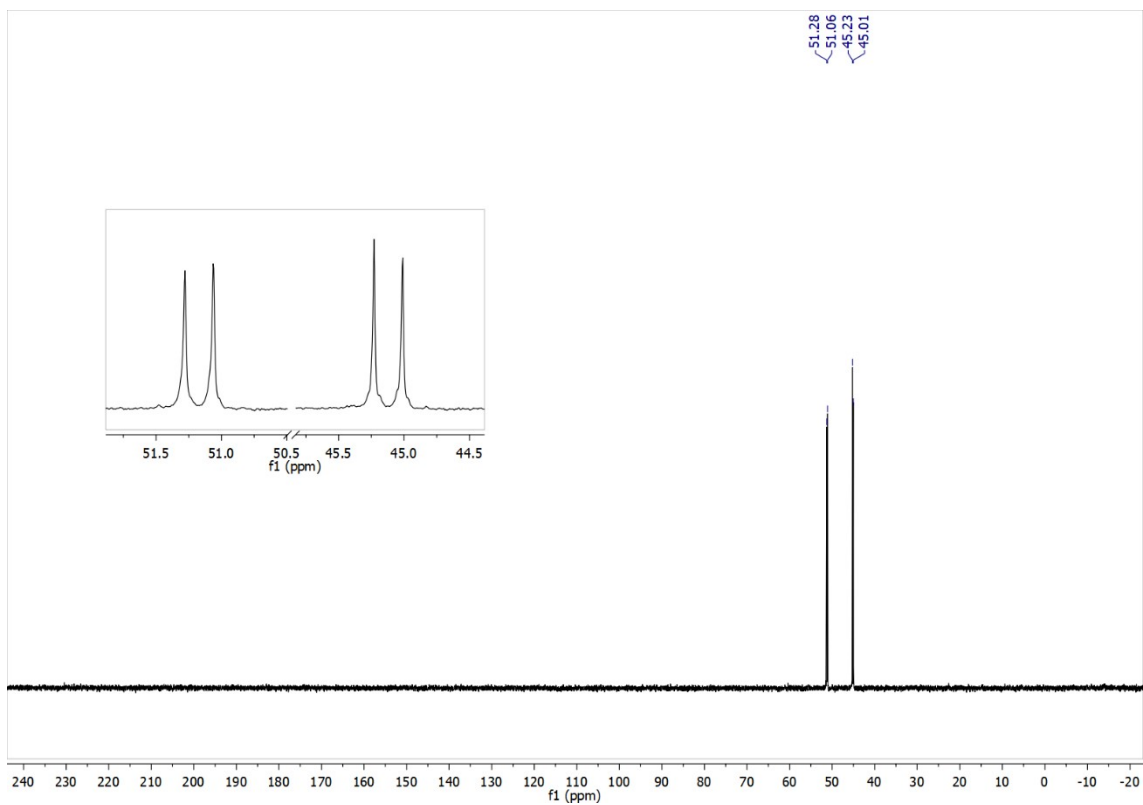

Figure S35. <sup>31</sup>P{<sup>1</sup>H} NMR spectrum of **5a** in CDCl<sub>3</sub> at 298 K.

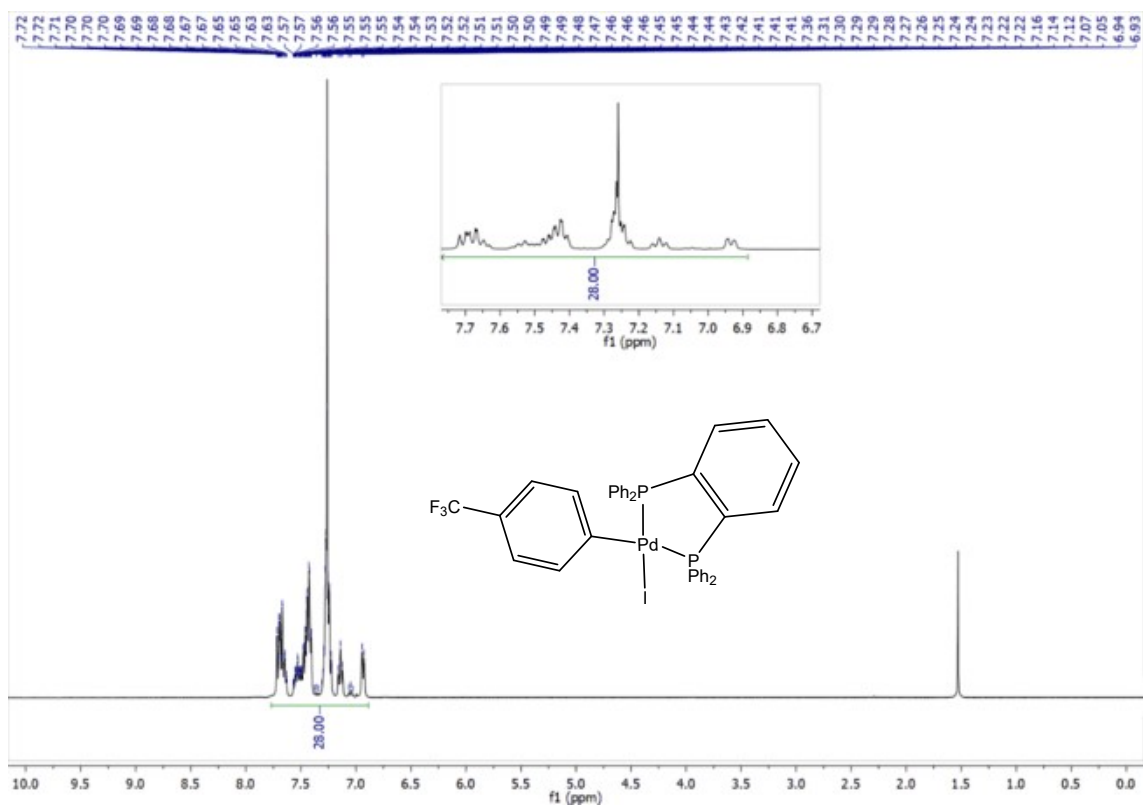

Figure S36. <sup>1</sup>H NMR spectrum of **5b** in CDCl<sub>3</sub> at 298 K.

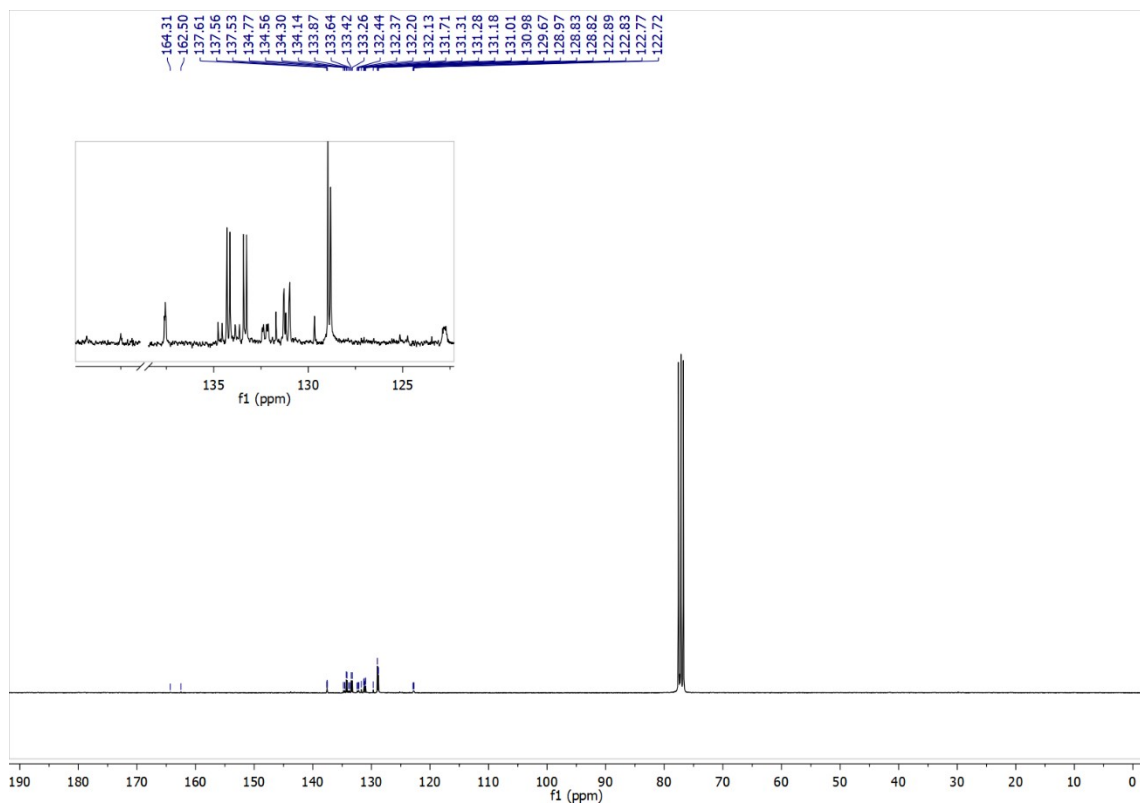

Figure S37.  $^{13}\text{C}\{^1\text{H}\}$  NMR spectrum of **5b** in  $\text{CDCl}_3$  at 298 K.

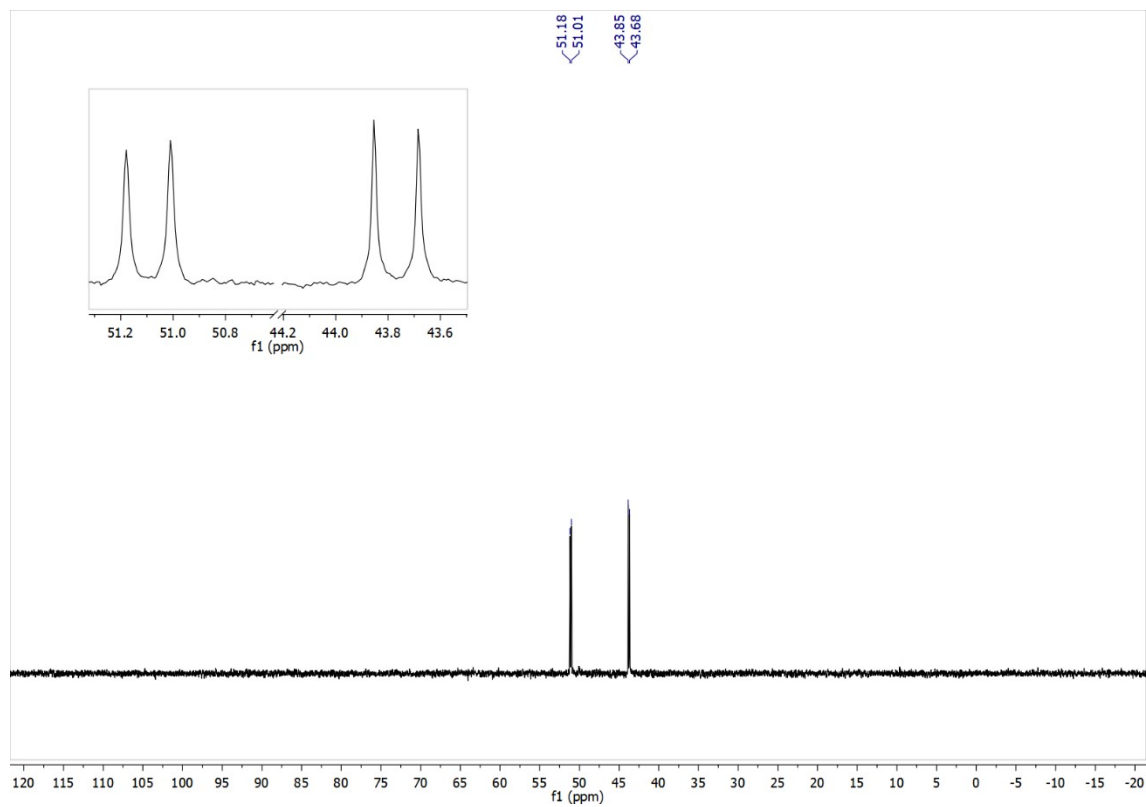

Figure S38.  $^{31}\text{P}\{^1\text{H}\}$  NMR spectrum of **5b** in  $\text{CDCl}_3$  at 298 K.

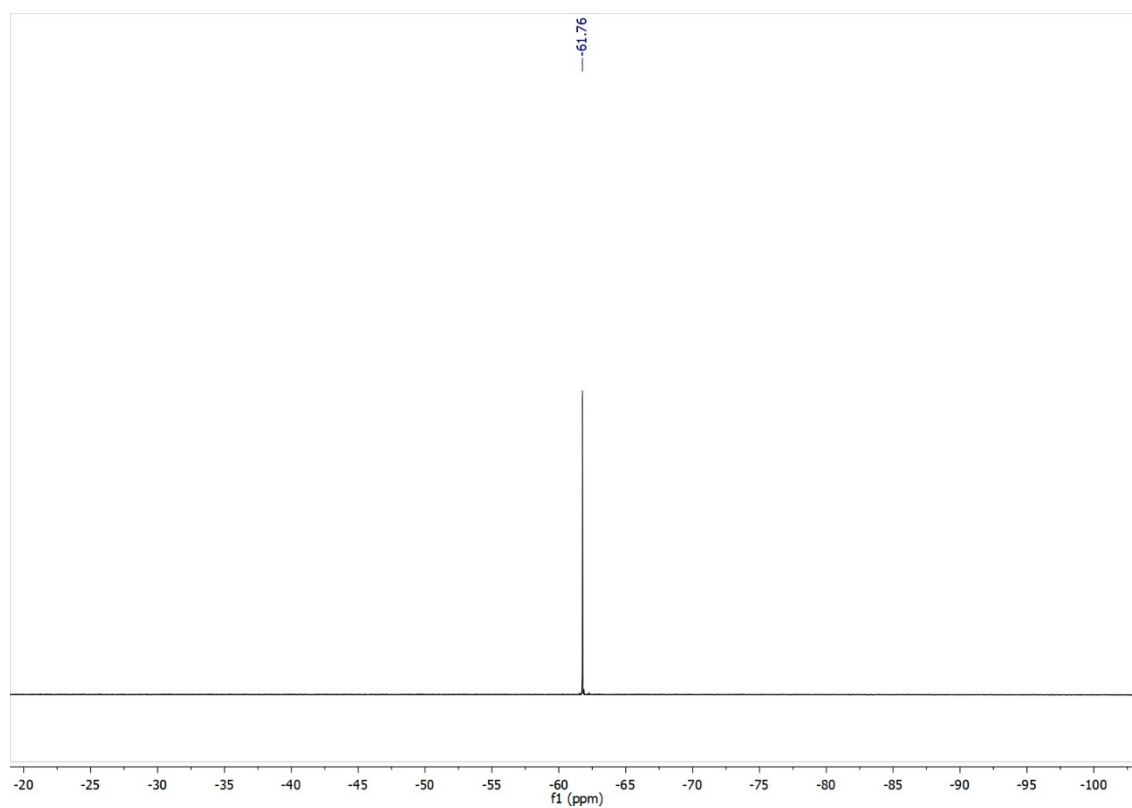

Figure S39.  $^{19}\text{F}\{^1\text{H}\}$  NMR spectrum of **5b** in  $\text{CDCl}_3$  at 298 K.

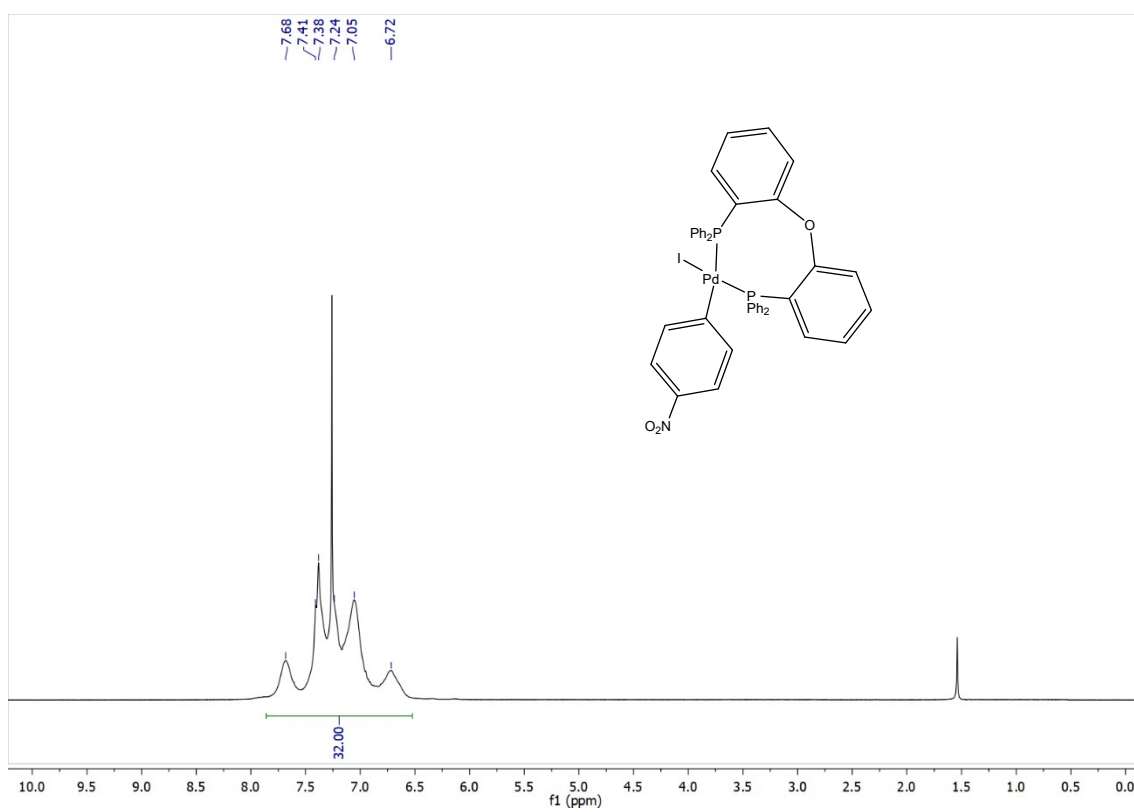

Figure S40.  $^1\text{H}$  NMR spectrum of **6a** in  $\text{CDCl}_3$  at 298 K.

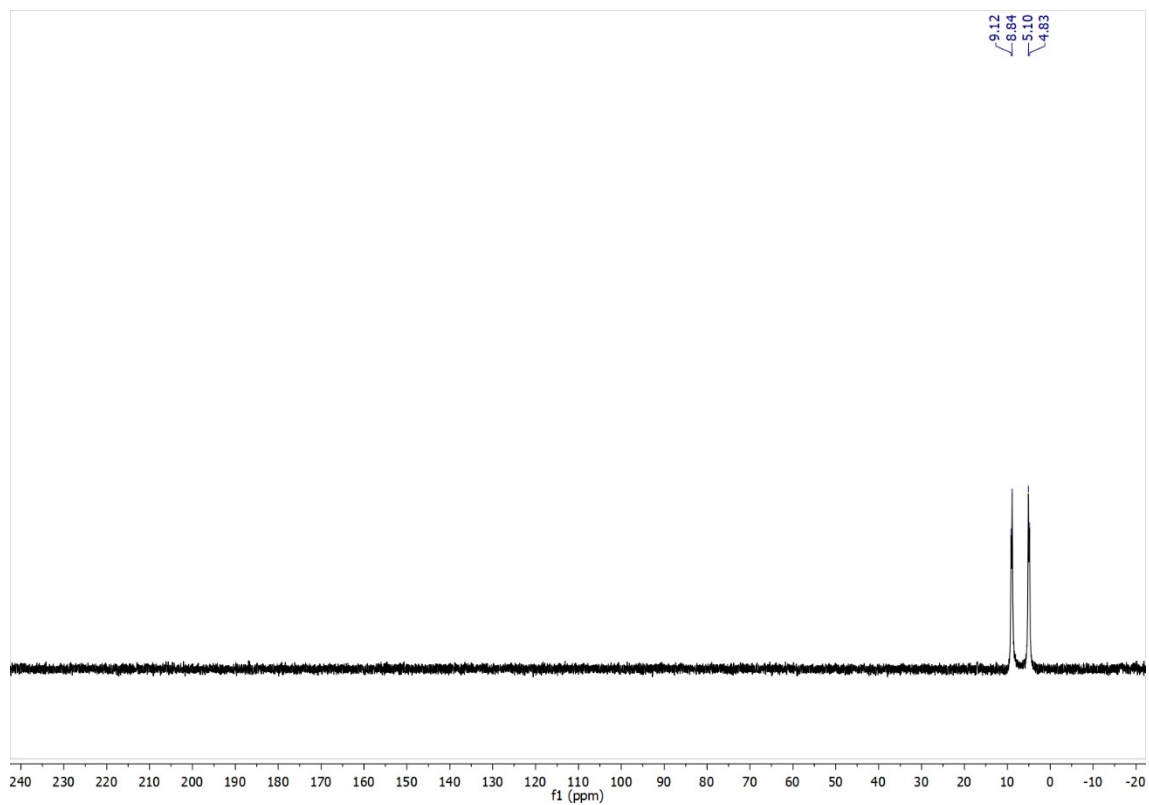

Figure S41. <sup>31</sup>P{<sup>1</sup>H} NMR spectrum of 6a in CDCl<sub>3</sub> at 298 K.

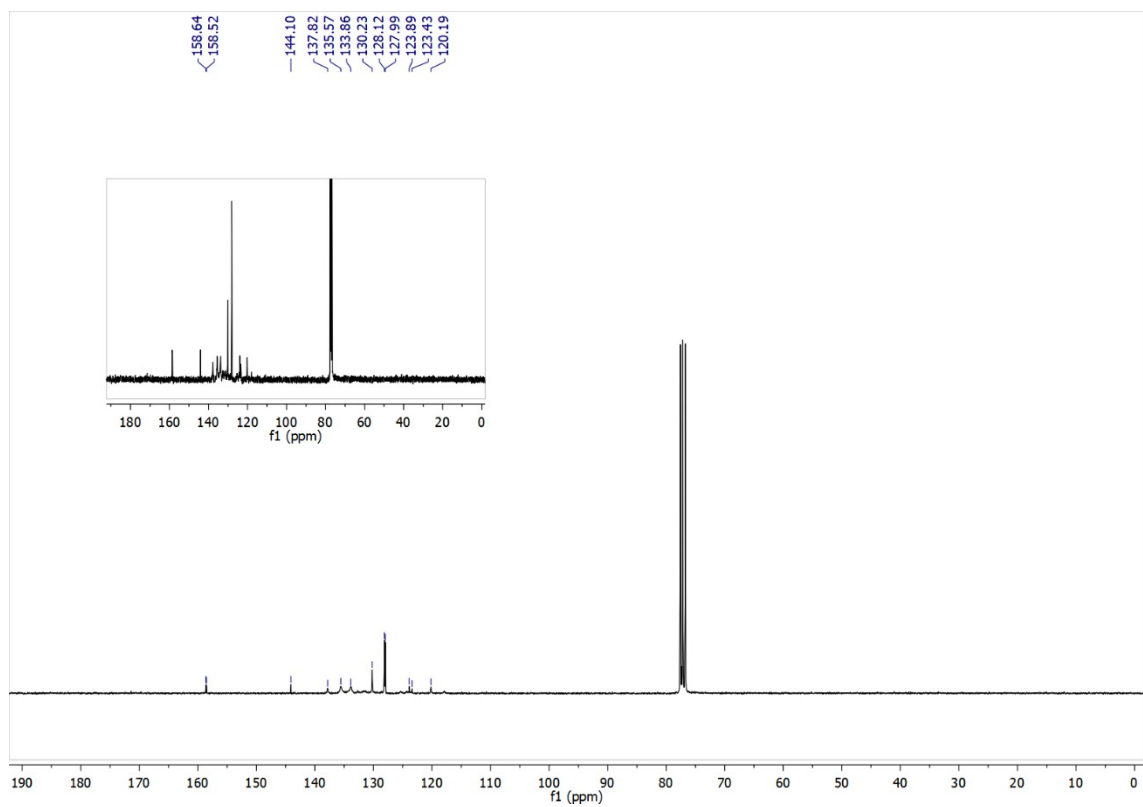

Figure S42. <sup>13</sup>C{<sup>1</sup>H} NMR spectrum of 6a in CDCl<sub>3</sub> at 298 K.

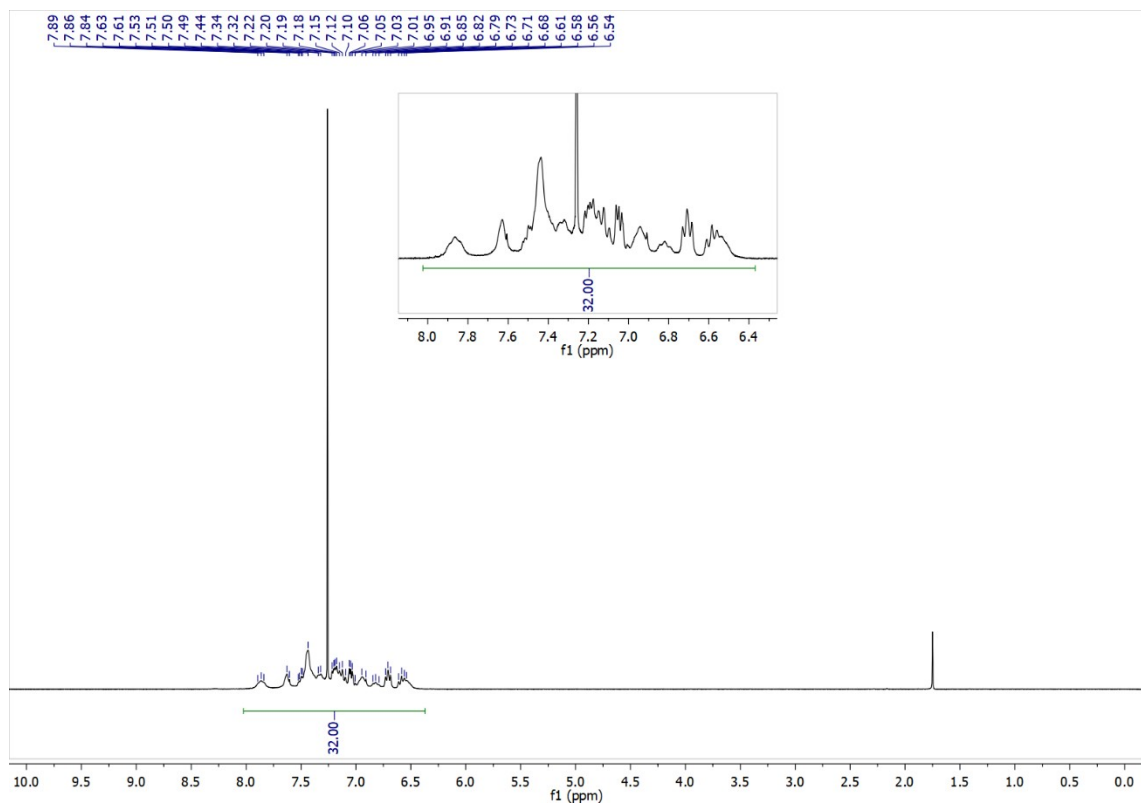

Figure S43.  $^1\text{H}$  NMR spectrum of **6a** in  $\text{CDCl}_3$  at 233 K.

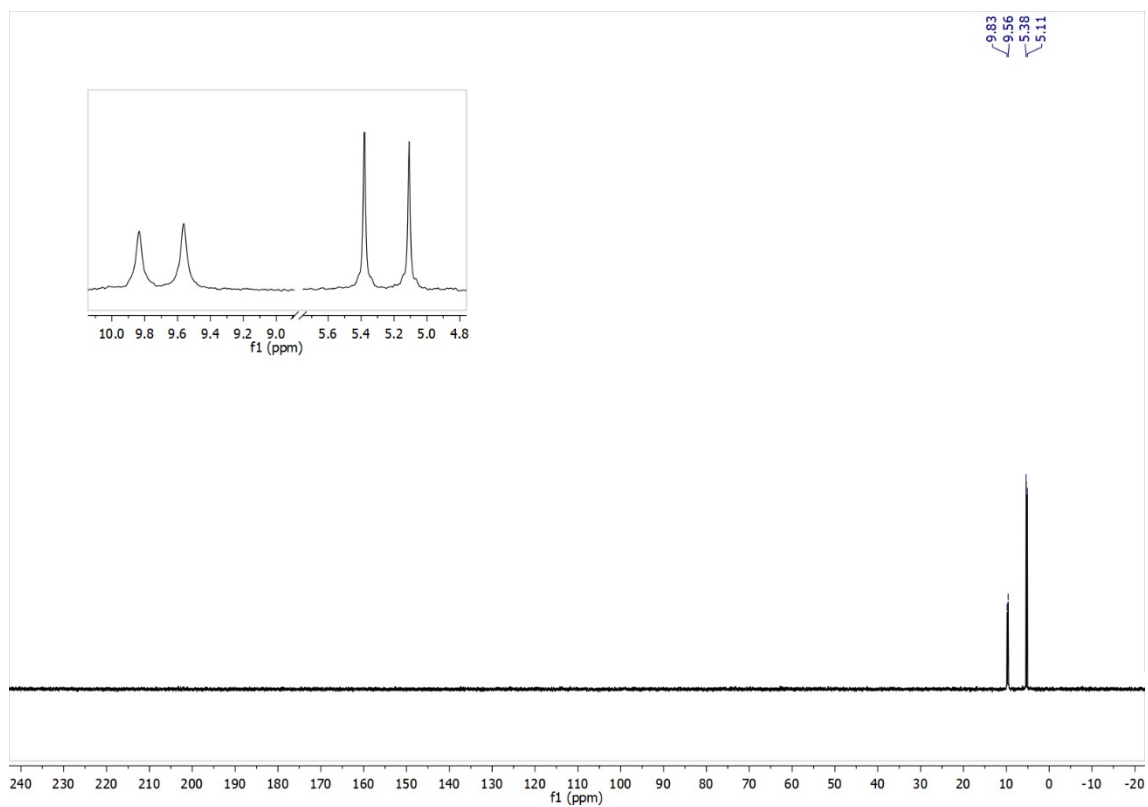

Figure S44.  $^{31}\text{P}\{^1\text{H}\}$  NMR spectrum of **6a** in  $\text{CDCl}_3$  at 233 K.

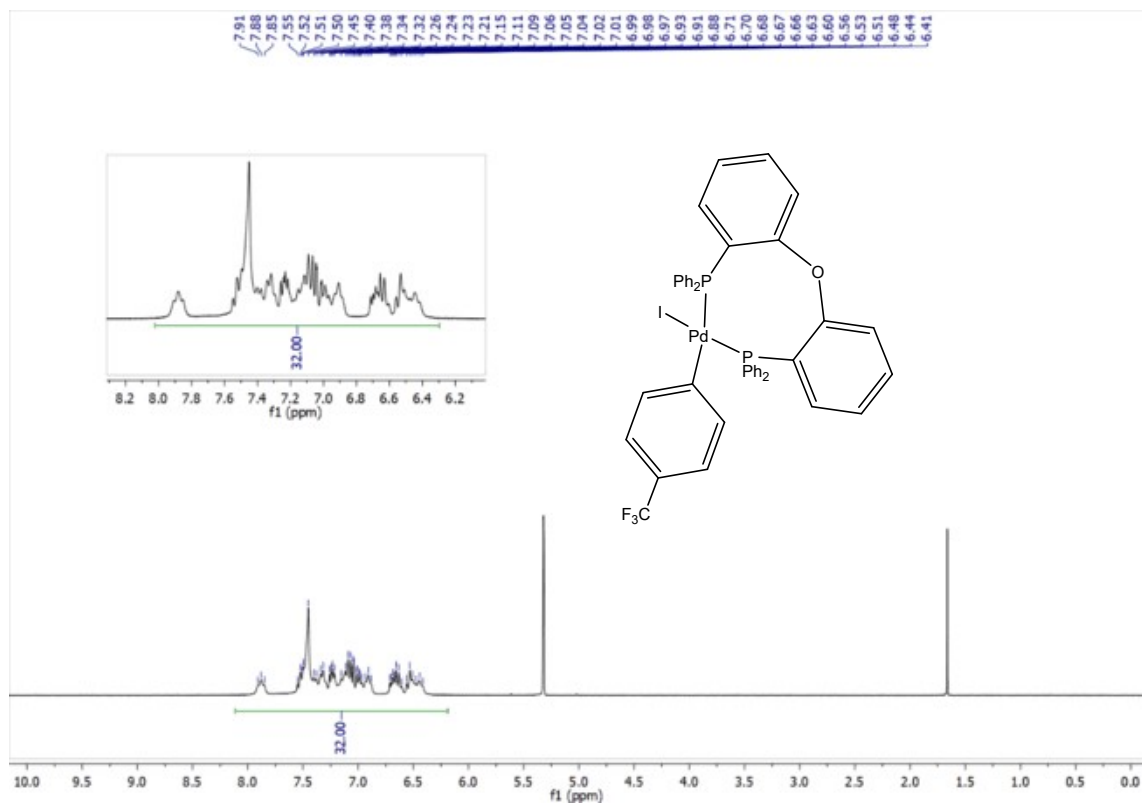

Figure S45. <sup>1</sup>H NMR spectrum of **6b** in CD<sub>2</sub>Cl<sub>2</sub> at 233 K.

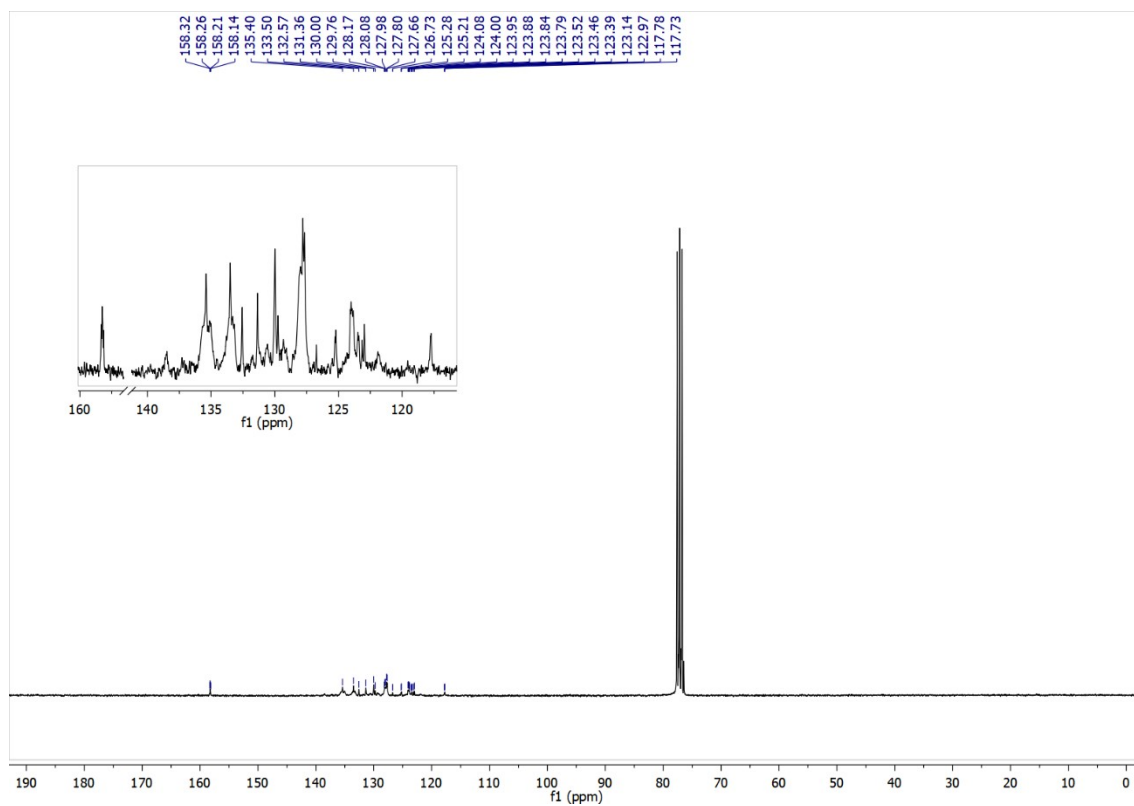

Figure S46. <sup>13</sup>C{<sup>1</sup>H} NMR spectrum of **6b** in CDCl<sub>3</sub> at 233 K.



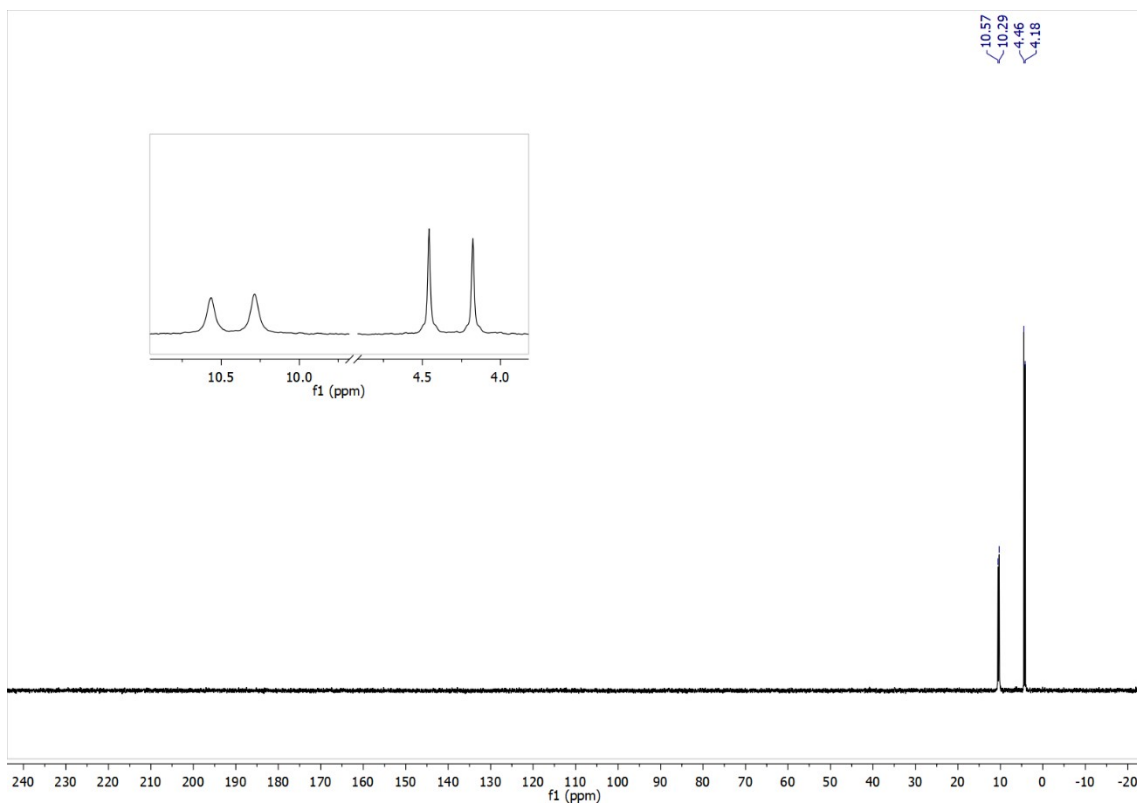

Figure S47. <sup>31</sup>P{<sup>1</sup>H} NMR spectrum of **6b** in CD<sub>2</sub>Cl<sub>2</sub> at 233 K.

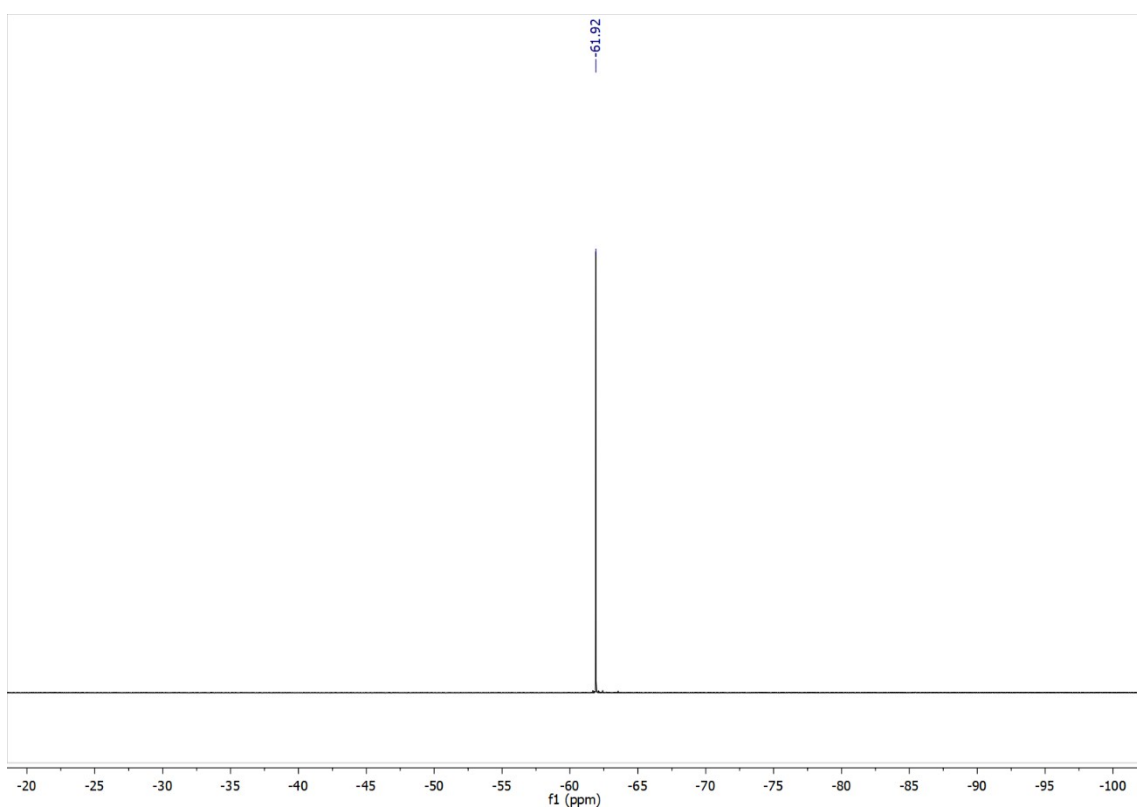

Figure S48. <sup>19</sup>F{<sup>1</sup>H} NMR spectrum of **6b** in CD<sub>2</sub>Cl<sub>2</sub> at 298 K.

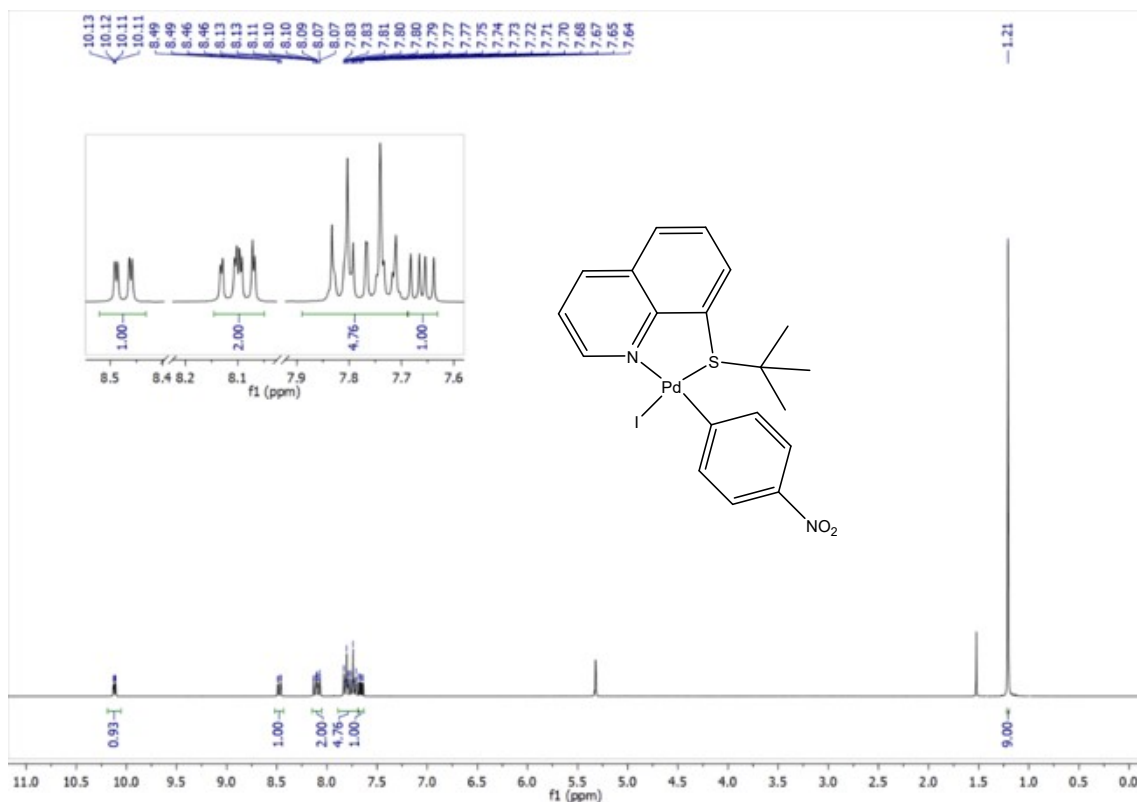

Figure S49. <sup>1</sup>H NMR spectrum of 7-I in CD<sub>2</sub>Cl<sub>2</sub> at 298 K.

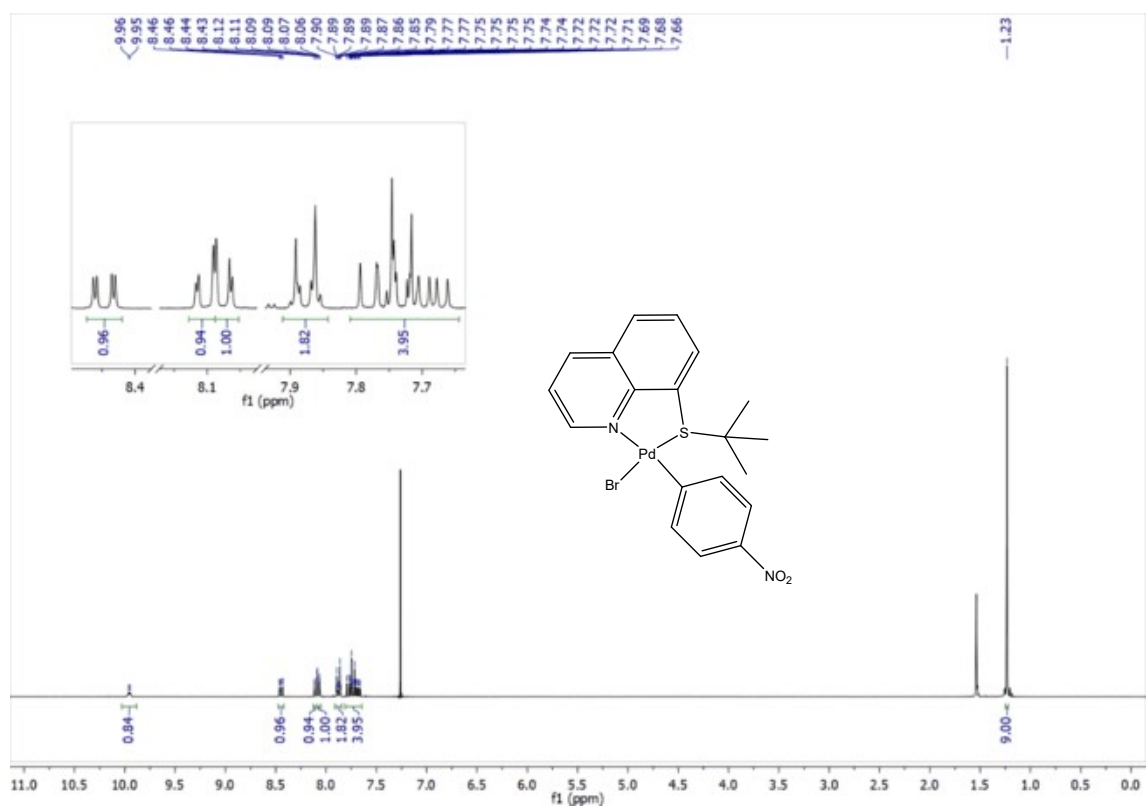

Figure S50. <sup>1</sup>H NMR spectrum of 7-Br in CDCl<sub>3</sub> at 298 K.

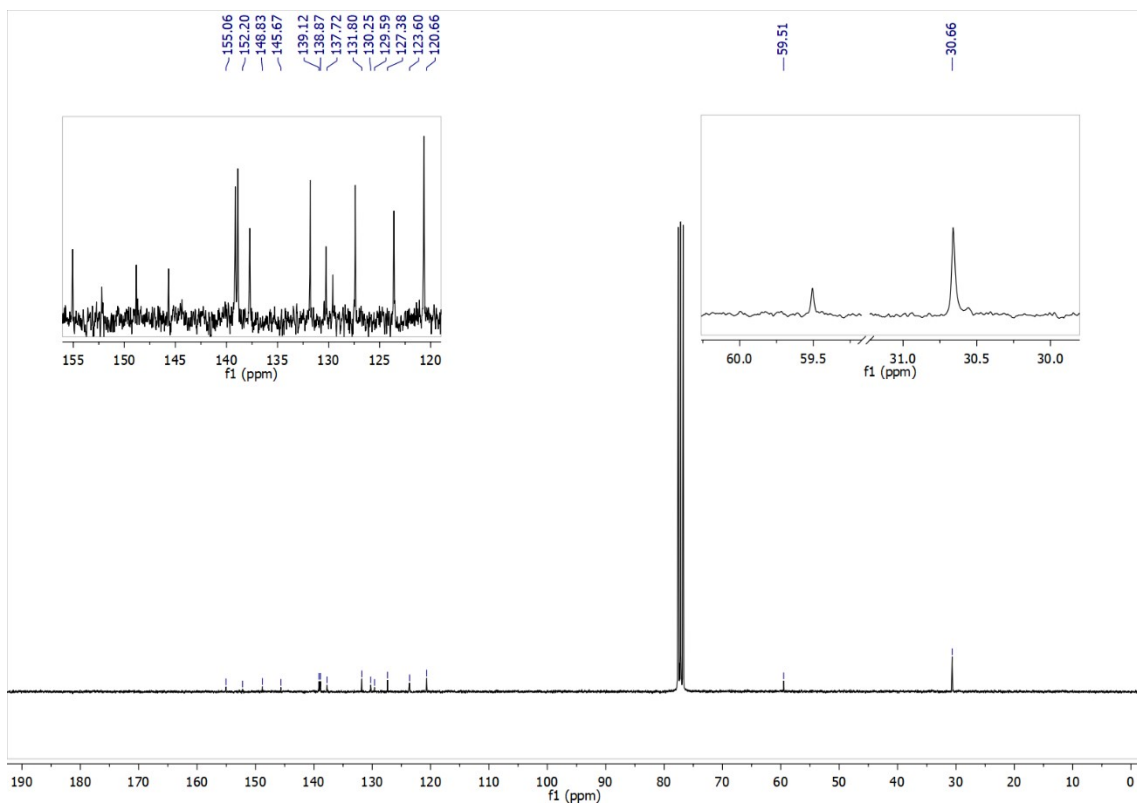

Figure S51.  $^{13}\text{C}\{^1\text{H}\}$  NMR spectrum of **7-Br** in  $\text{CDCl}_3$  at 298 K.

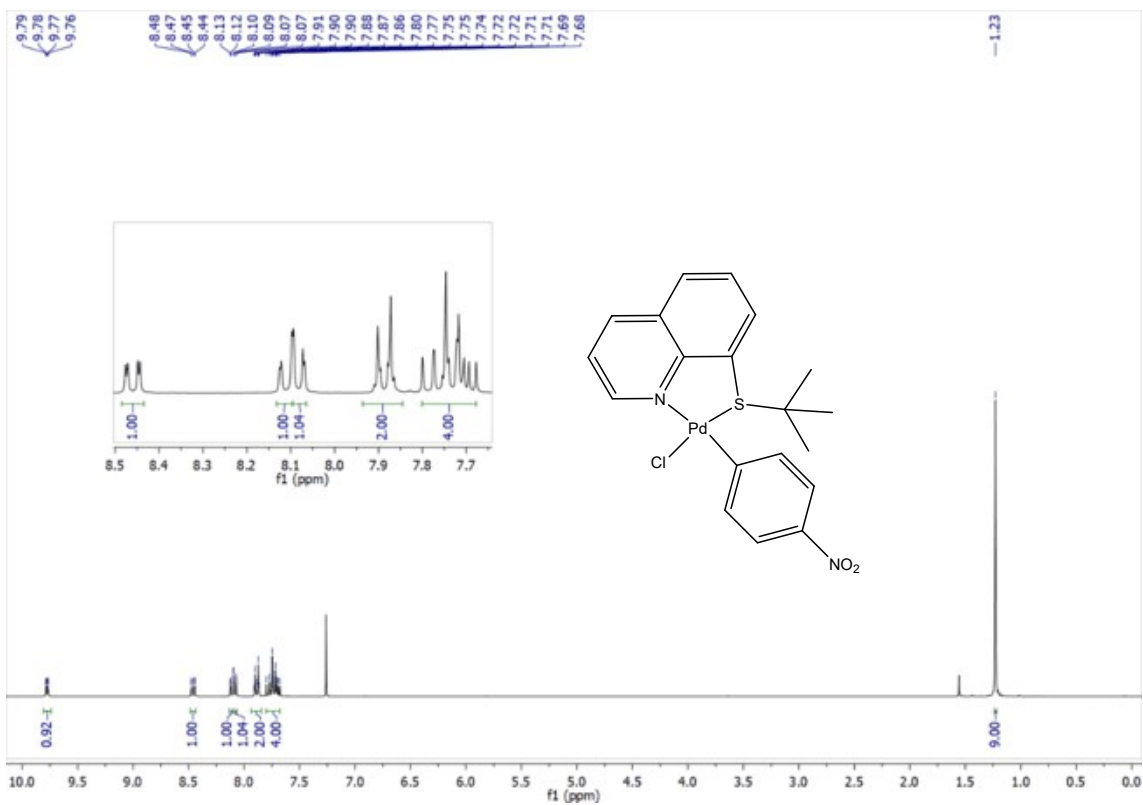

Figure S52.  $^1\text{H}$  NMR spectrum of **7-Cl** in  $\text{CDCl}_3$  at 298 K.

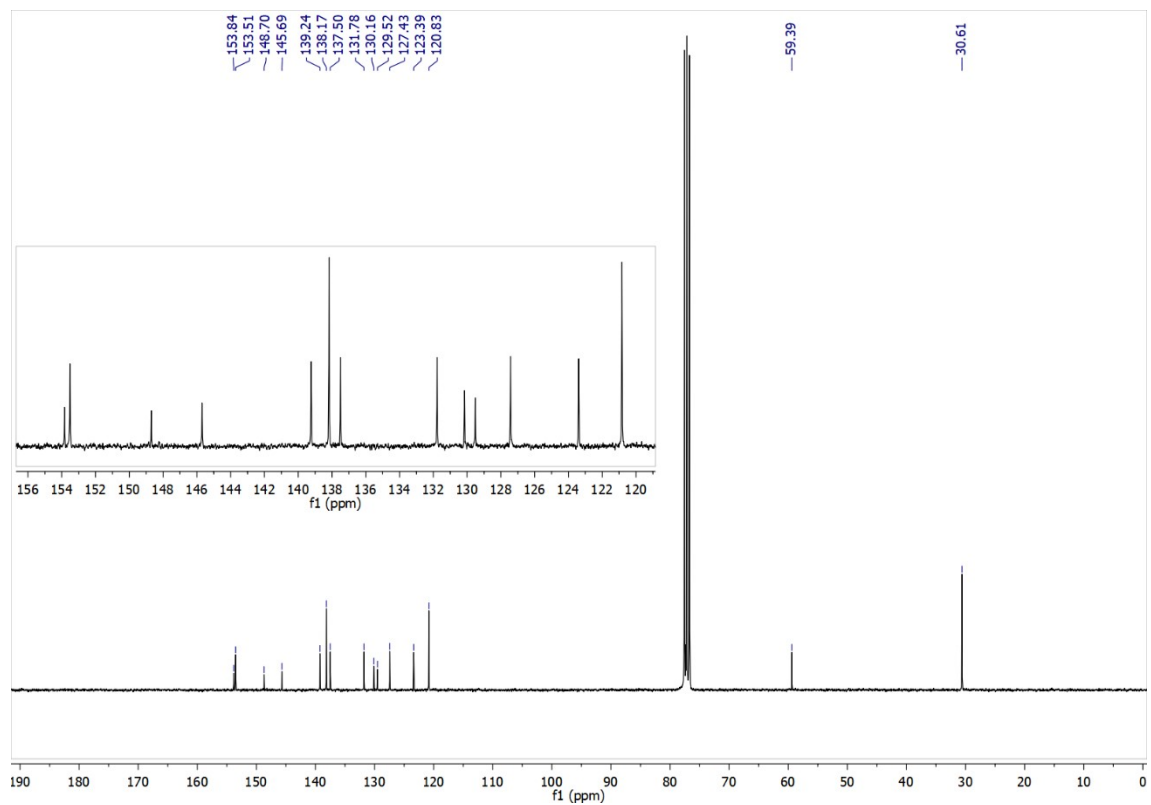

Figure S53.  $^{13}\text{C}\{^1\text{H}\}$  NMR spectrum of **7-Cl** in  $\text{CDCl}_3$  at 298 K.

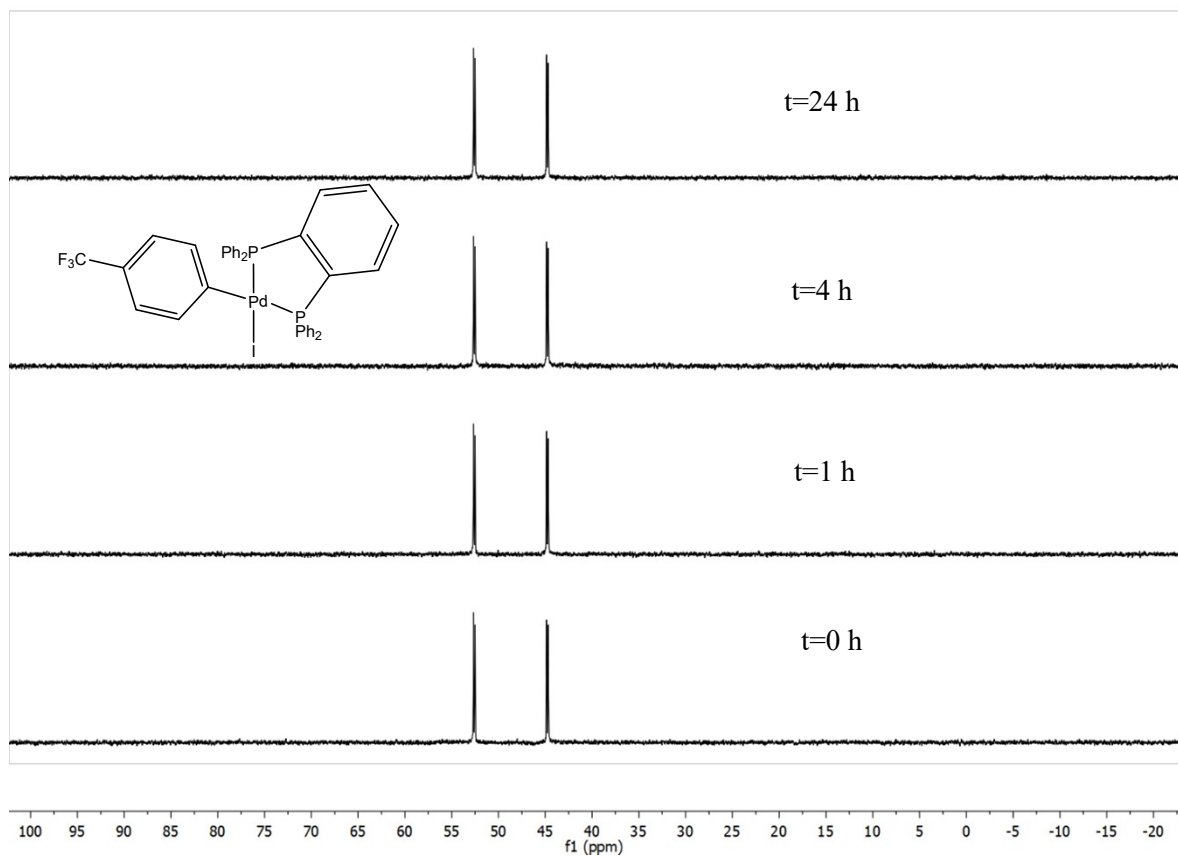

Figure S54.  $^{31}\text{P}\{^1\text{H}\}$  NMR spectra of complex **5b** in 1:1  $\text{DMSO-}d_6/\text{D}_2\text{O}$  ( $t = 0, 1, 4$  and  $24$  h).

## IR SPECTRA

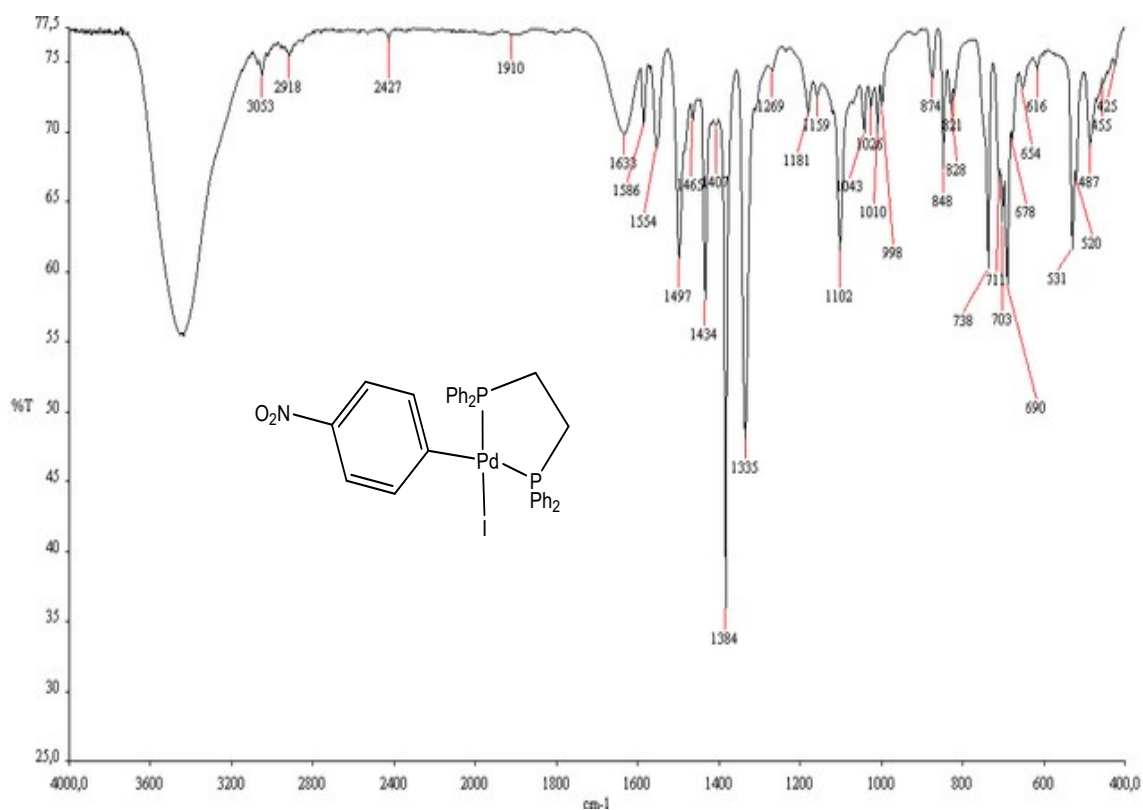

Figure S55. IR spectrum (KBr pellet) of **2a** at 298 K.

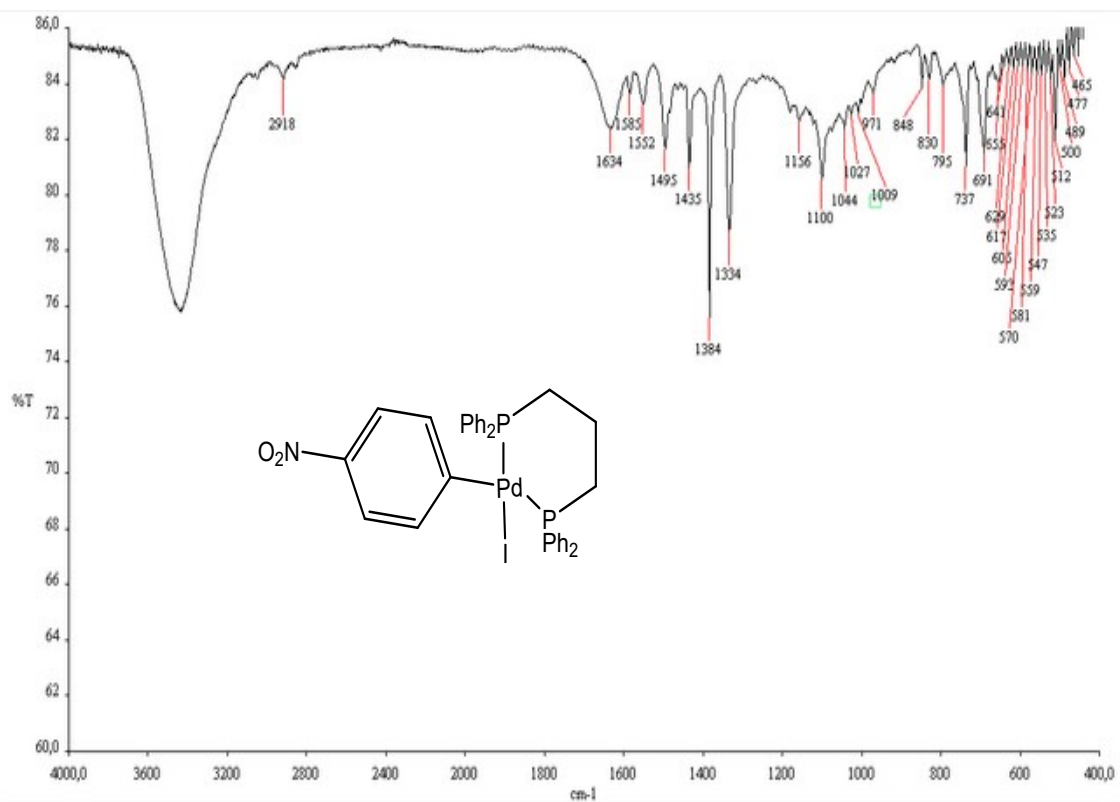

Figure S56. IR spectrum (KBr pellet) of **3a** at 298 K.

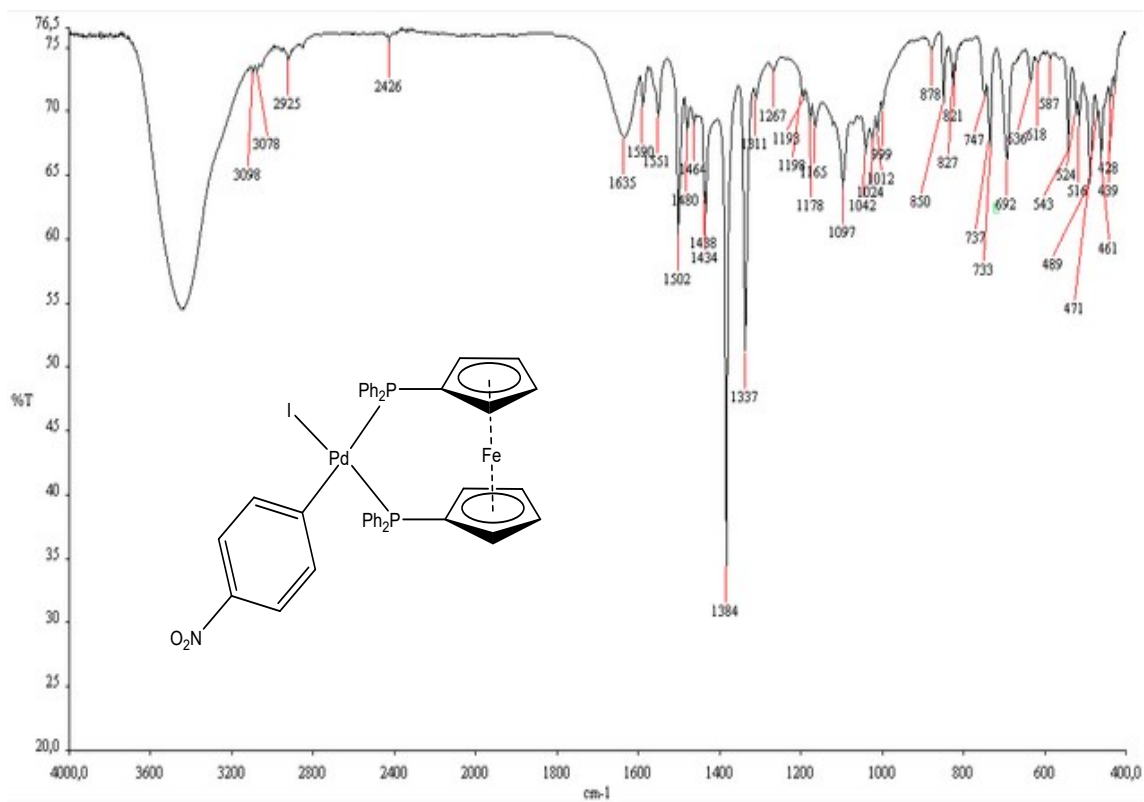

Figure S57. IR spectrum (KBr pellet) of **4a** at 298 K.

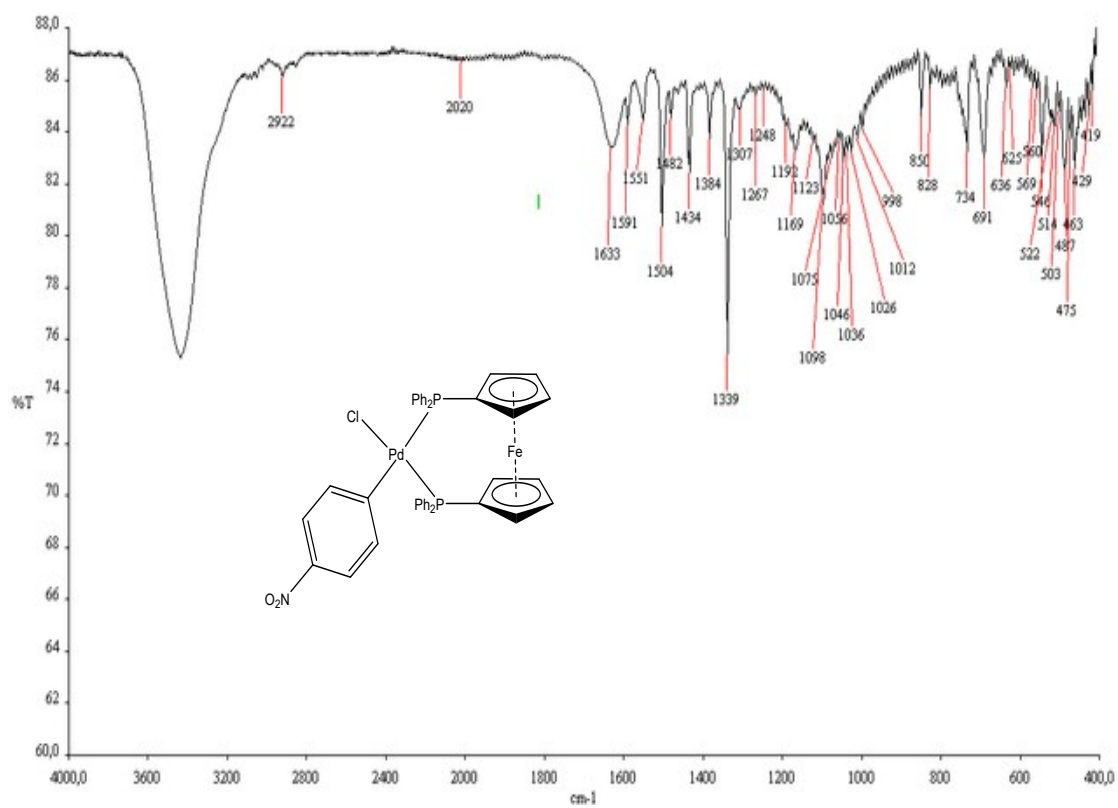

Figure S58. IR spectrum (KBr pellet) of **4a-Cl** at 298 K.

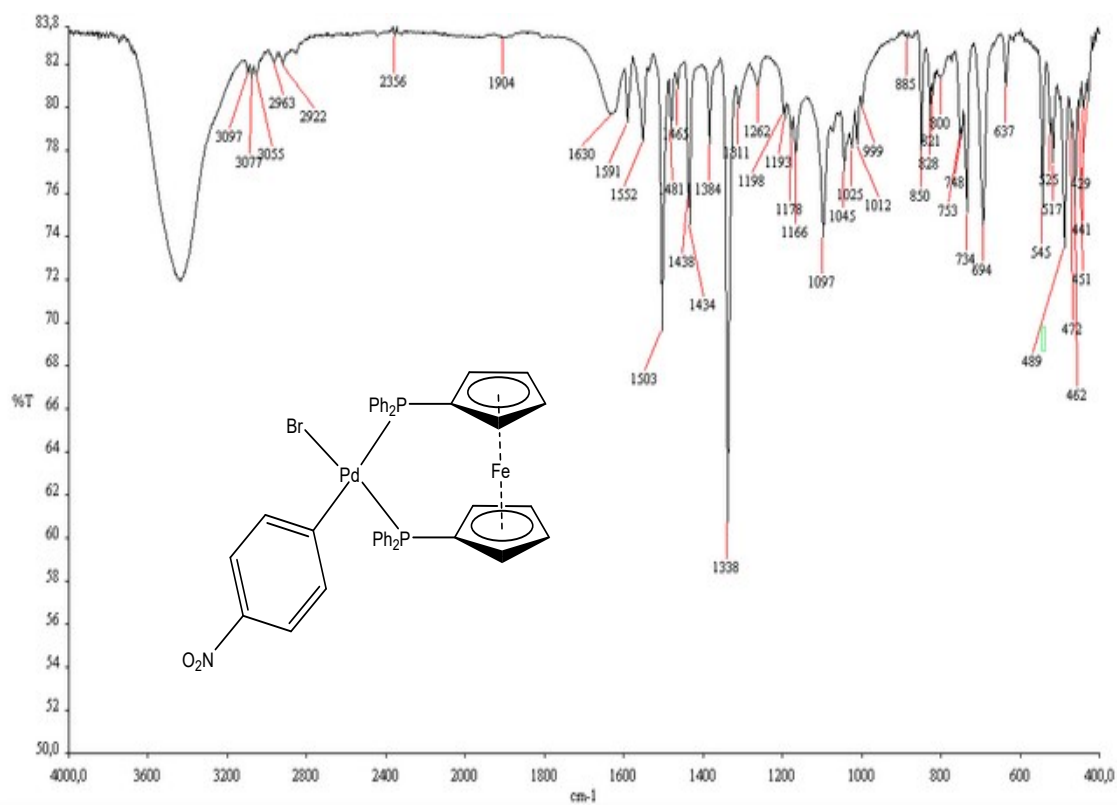

Figure S59. IR spectrum (KBr pellet) of 4a-Br at 298 K.

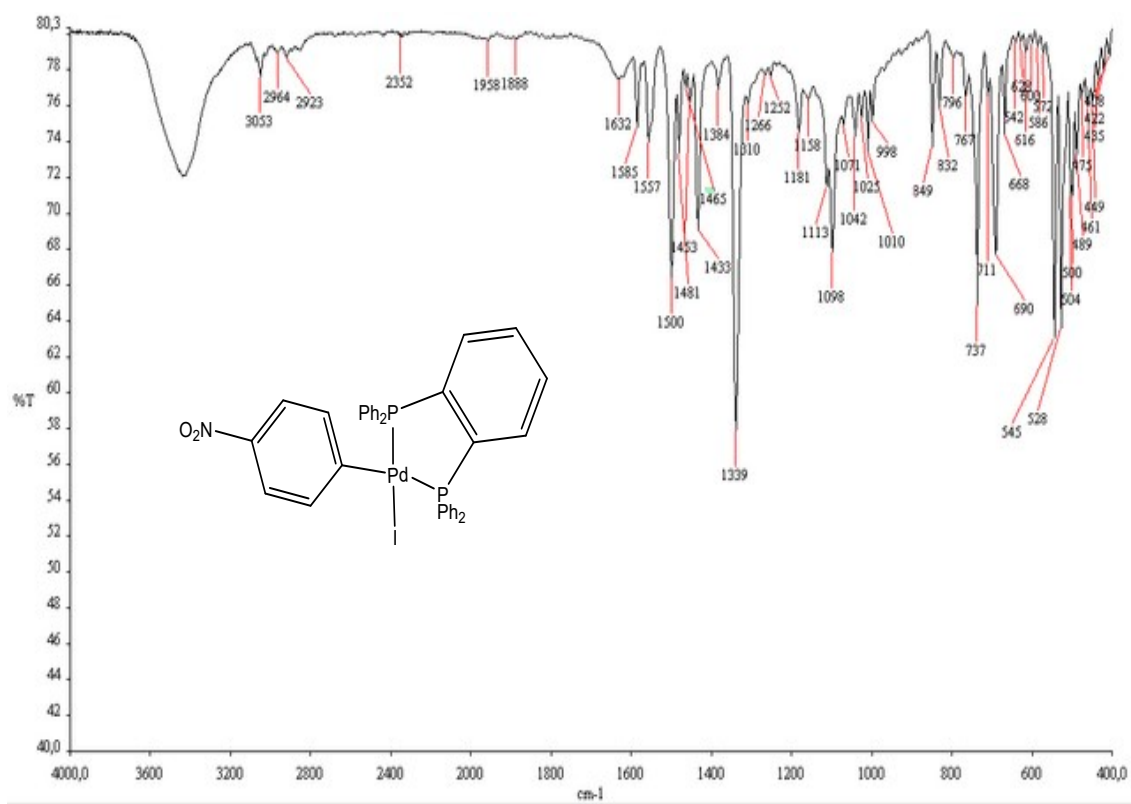

Figure S60. IR spectrum (KBr pellet) of 5a at 298 K.

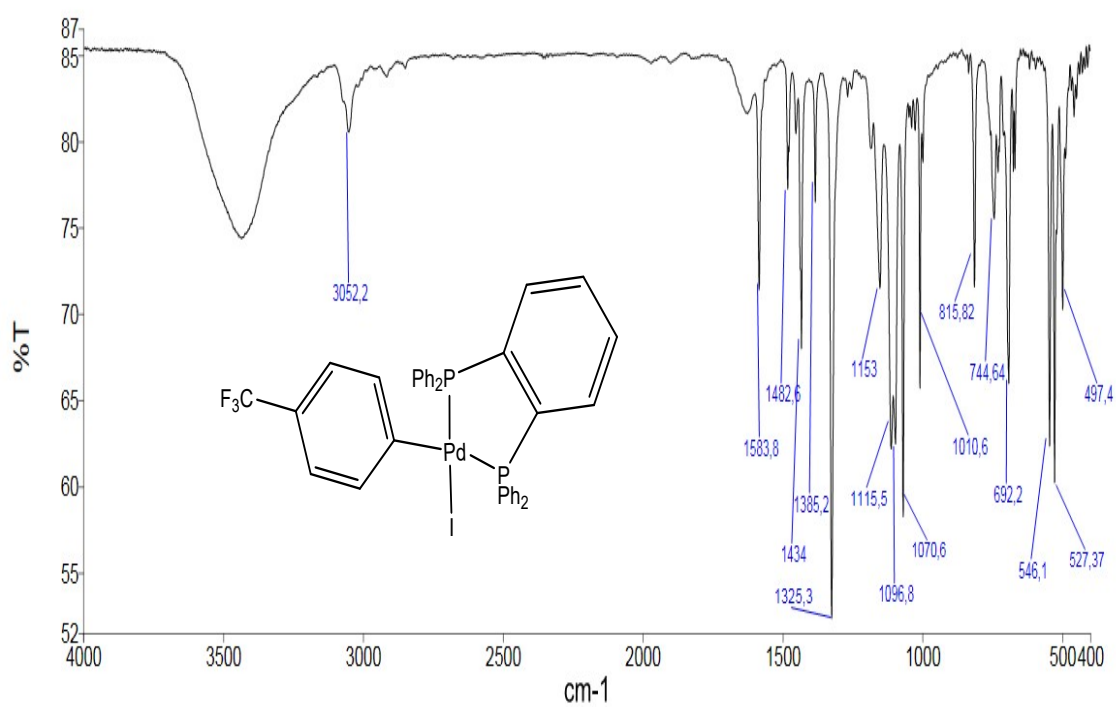

Figure S61. IR spectrum (KBr pellet) of **5b** at 298 K.

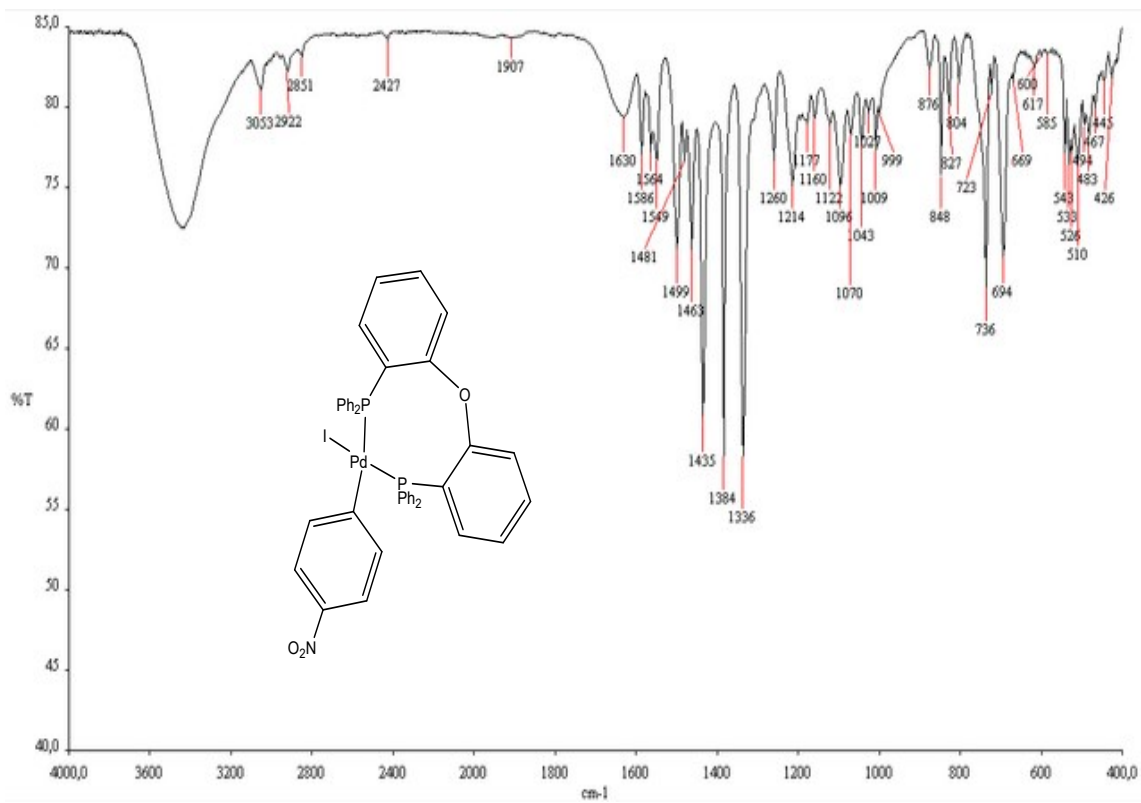

Figure S62. IR spectrum (KBr pellet) of **6a** at 298 K.



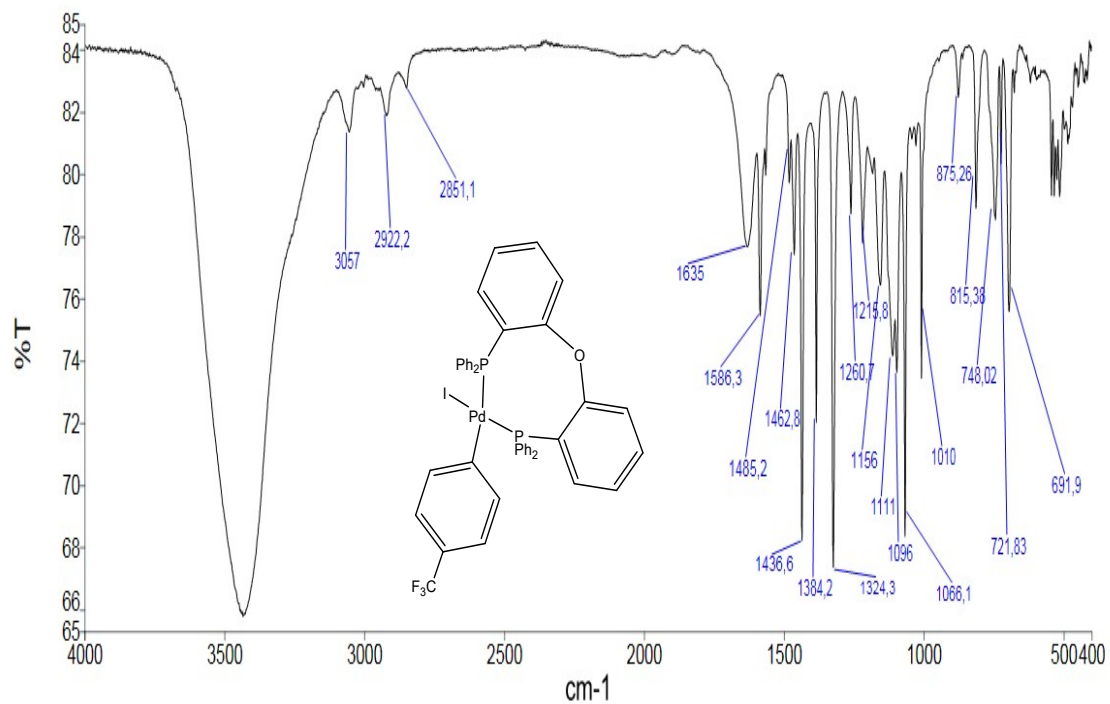

Figure S63. IR spectrum (KBr pellet) of **6b** at 298 K.

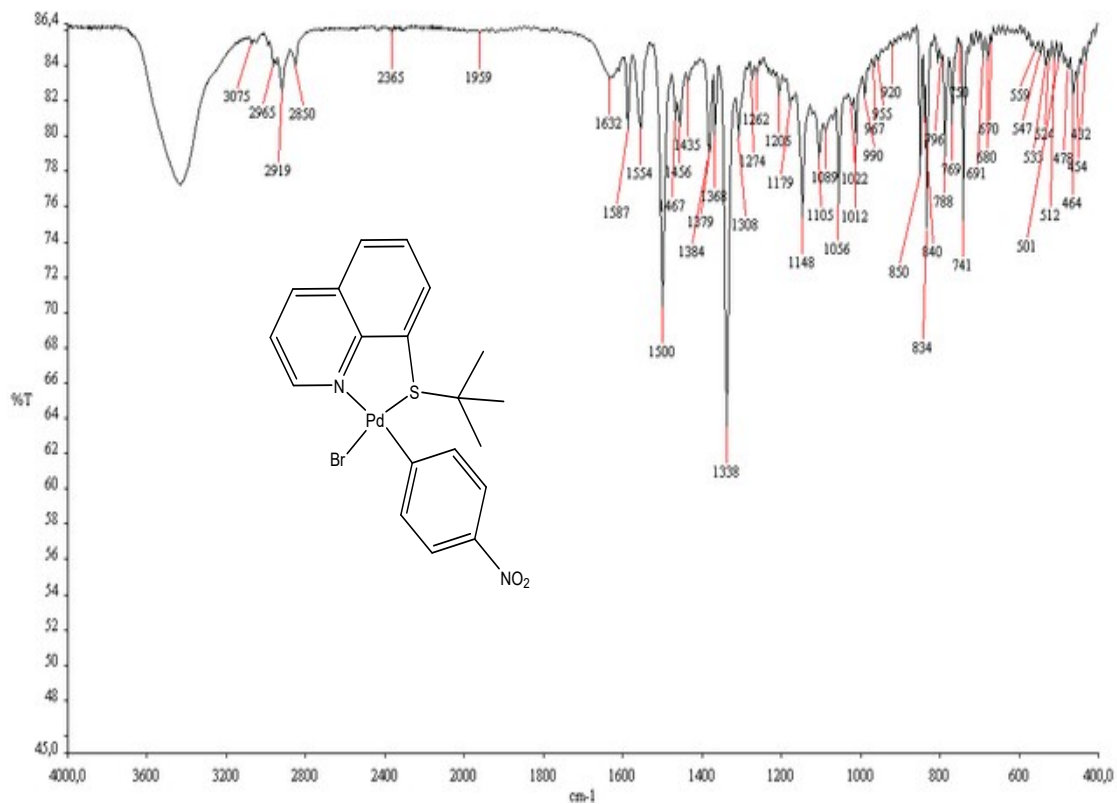

Figure S64. IR spectrum (KBr pellet) of **7-Br** at 298 K.

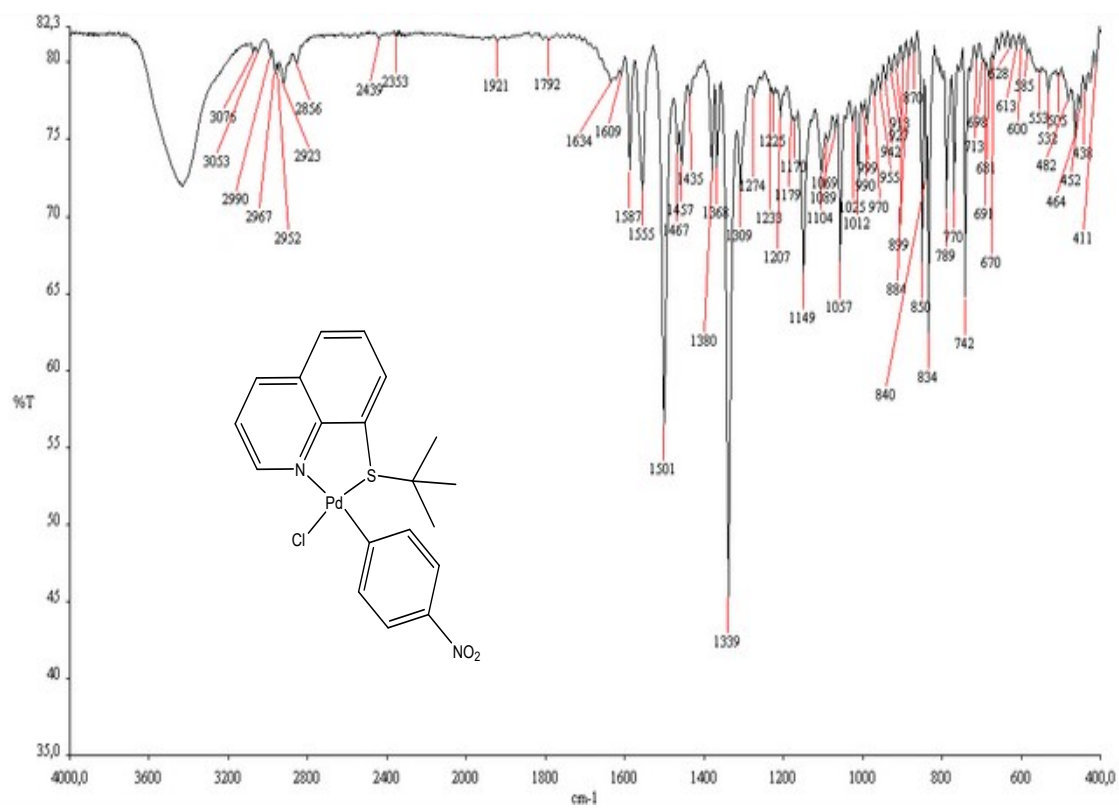

Figure S65. IR spectrum (KBr pellet) of 7-Cl at 298 K.

## HRMS SPECTRA

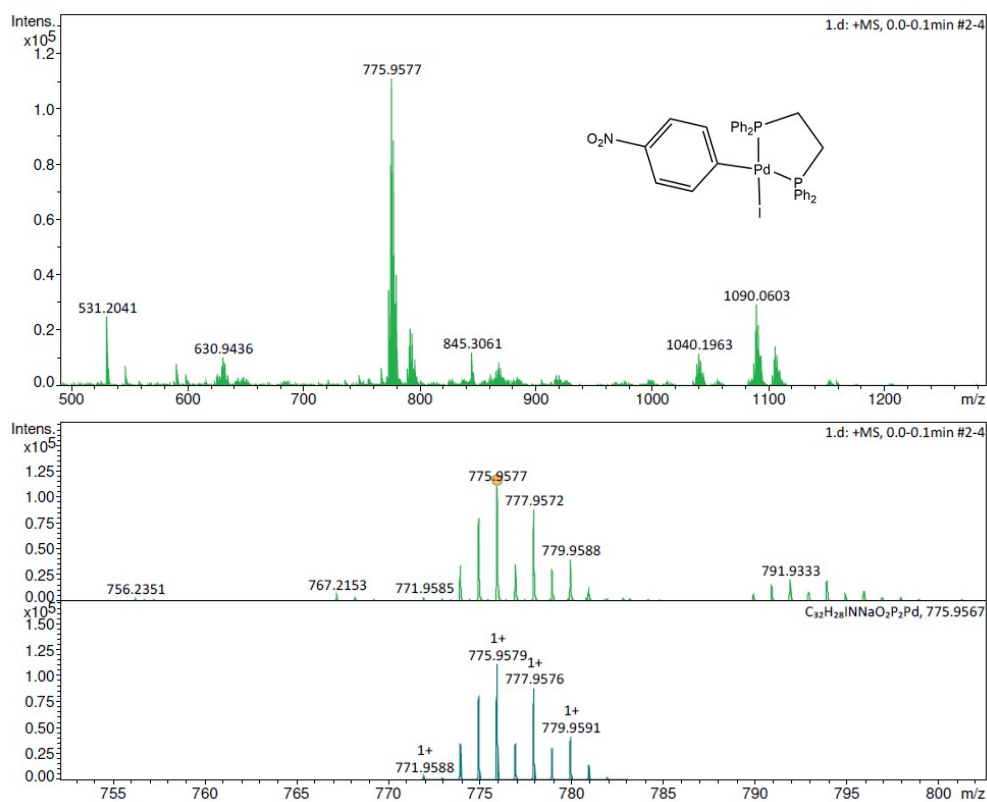

Figure S66. HRMS spectrum of 2a.

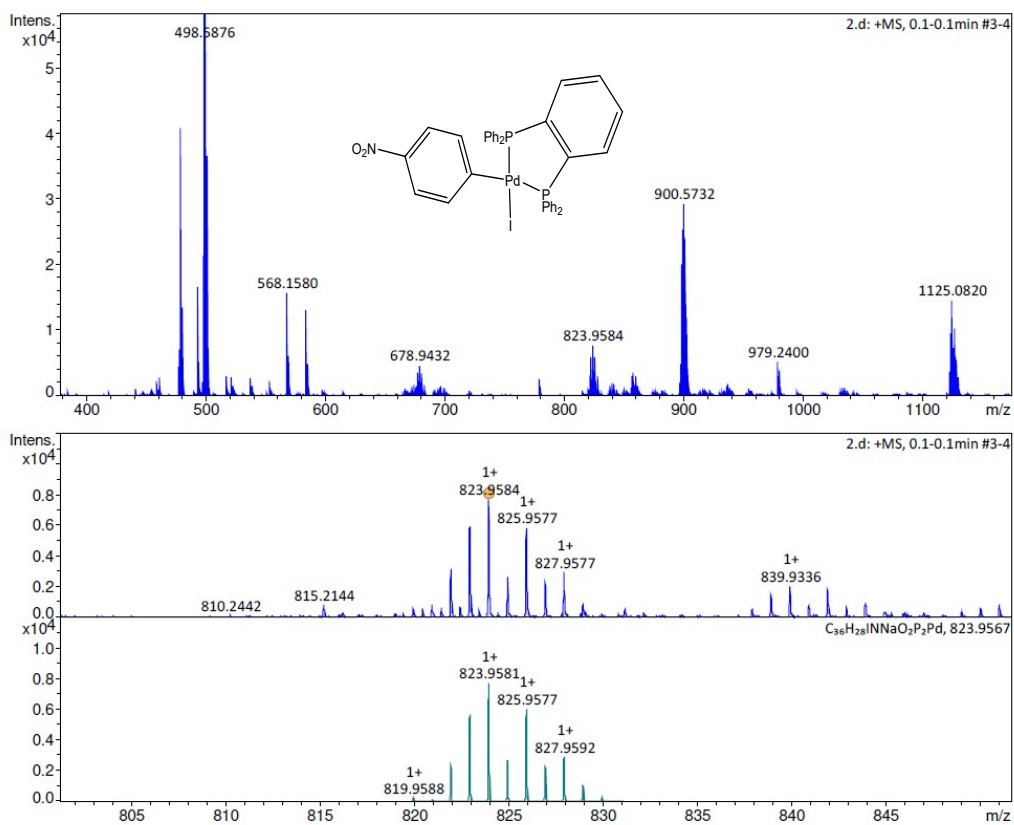

Figure S67 HRMS spectrum of 5a.

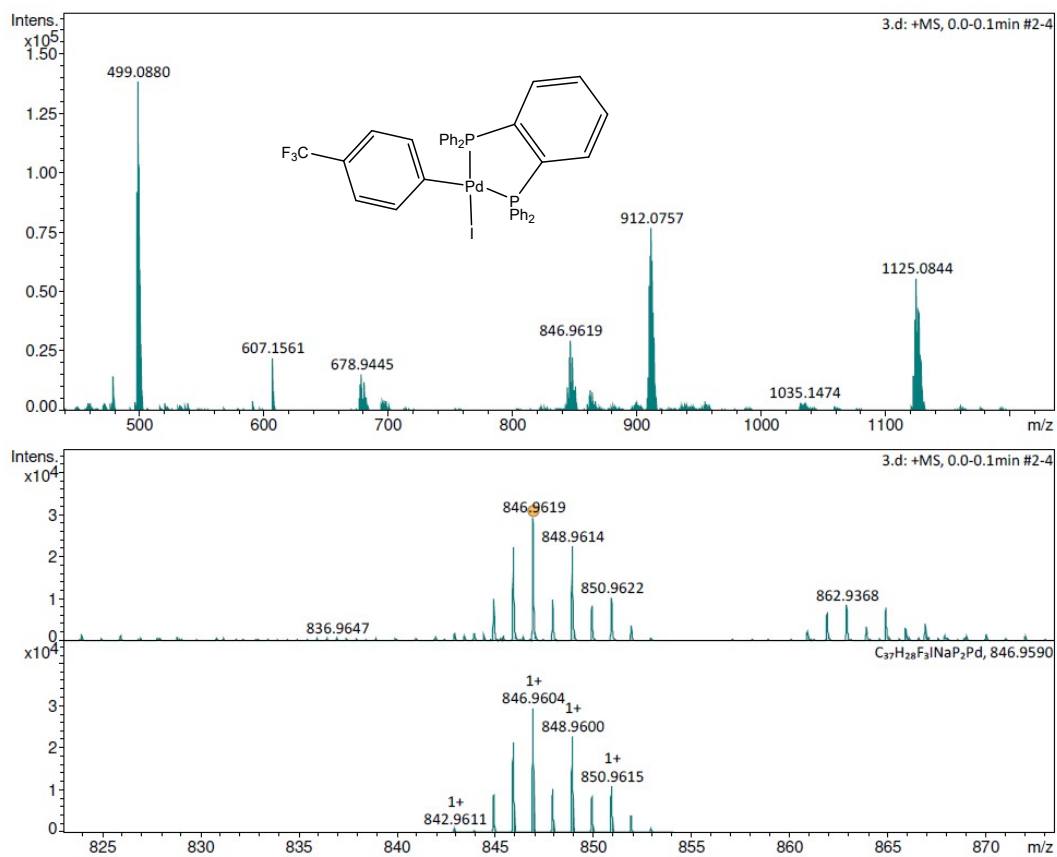

Figure S68. HRMS spectrum of **5b**.

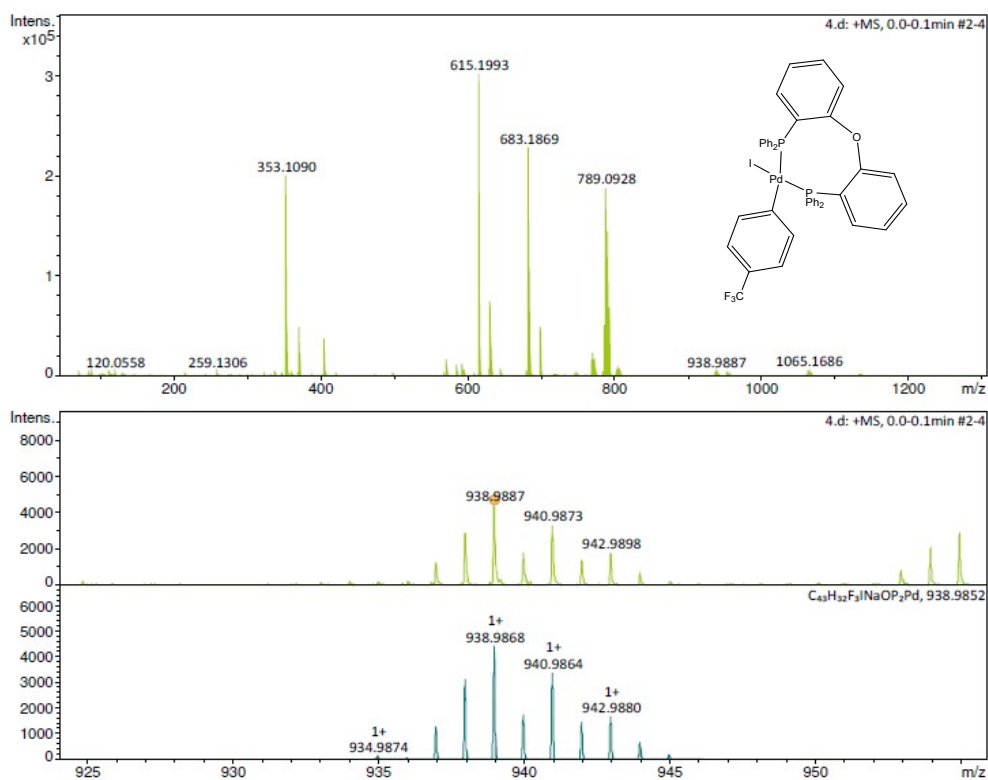

Figure S69. HRMS spectrum of **6b**.

## X-RAY DIFFRACTION ANALYSIS

**Table S1.** Crystallographic data.

| Compound                                                              | 6a@100 K                                                                                                                                      | 4a@100 K                                                     | 4a-Br@298 K                                             |
|-----------------------------------------------------------------------|-----------------------------------------------------------------------------------------------------------------------------------------------|--------------------------------------------------------------|---------------------------------------------------------|
| Formula                                                               | $\text{PdC}_{42}\text{H}_{32}\text{INO}_3\text{P}_2 \cdot \frac{3}{8}\text{C}_4\text{H}_{10}\text{O} \cdot \frac{1}{2}\text{CH}_2\text{Cl}_2$ | $\text{PdC}_{40}\text{H}_{32}\text{FeINO}_2\text{P}_2$       | $\text{PdC}_{40}\text{H}_{32}\text{BrFeNO}_2\text{P}_2$ |
| M/g·mol <sup>-1</sup>                                                 | 964.18                                                                                                                                        | 909.75                                                       | 862.76                                                  |
| Space group                                                           | <i>C</i> 2/ <i>c</i>                                                                                                                          | <i>P</i> 2 <sub>1</sub> / <i>c</i>                           | <i>P</i> 2 <sub>1</sub> / <i>c</i>                      |
| Crystal system                                                        | Monoclinic                                                                                                                                    | Monoclinic                                                   | Monoclinic                                              |
| <i>a</i> /Å                                                           | 34.741(7)                                                                                                                                     | 21.393(4)                                                    | 21.451(4)                                               |
| <i>b</i> /Å                                                           | 10.714(2)                                                                                                                                     | 9.493(2)                                                     | 9.566(2)                                                |
| <i>c</i> /Å                                                           | 25.823(5)                                                                                                                                     | 16.865(3)                                                    | 16.916(3)                                               |
| $\alpha$ /°                                                           | 90                                                                                                                                            | 90                                                           | 90                                                      |
| $\beta$ /°                                                            | 116.48(3)                                                                                                                                     | 95.88(3)                                                     | 95.90(3)                                                |
| $\gamma$ /°                                                           | 90                                                                                                                                            | 90                                                           | 90                                                      |
| V/Å <sup>3</sup>                                                      | 8603(4)                                                                                                                                       | 3407.0(12)                                                   | 3452.8(12)                                              |
| <i>Z</i>                                                              | 8                                                                                                                                             | 4                                                            | 4                                                       |
| T/K                                                                   | 100(2)                                                                                                                                        | 100(2)                                                       | 298(2)                                                  |
| D/g·cm <sup>-3</sup>                                                  | 1.489                                                                                                                                         | 1.774                                                        | 1.660                                                   |
| F(000)                                                                | 3846                                                                                                                                          | 1800                                                         | 1728                                                    |
| $\mu$ /mm <sup>-1</sup>                                               | 0.906                                                                                                                                         | 1.361                                                        | 1.541                                                   |
| Measured Reflections                                                  | 97763                                                                                                                                         | 76340                                                        | 79620                                                   |
| Unique Reflections                                                    | 18733                                                                                                                                         | 14752                                                        | 15216                                                   |
| R <sub>int</sub>                                                      | 0.0257                                                                                                                                        | 0.0393                                                       | 0.0594                                                  |
| Obs. Refl.ns [ $I \geq 2\sigma(I)$ ]                                  | 17229                                                                                                                                         | 12732                                                        | 9738                                                    |
| $\theta_{\text{min}} - \theta_{\text{max}}$ /°                        | 1.14 – 31.08                                                                                                                                  | 0.84 – 31.08                                                 | 0.83 – 31.10                                            |
| hkl ranges                                                            | -57,57; -17,17; -42,42                                                                                                                        | -33,33; -15,15; -28,27                                       | -34,34; -15,15; -26,26                                  |
| R(F <sup>2</sup> ) (Obs.Refl.ns)                                      | 0.0452                                                                                                                                        | 0.0473                                                       | 0.0472                                                  |
| wR(F <sup>2</sup> ) (All Refl.ns)                                     | 0.1304                                                                                                                                        | 0.1294                                                       | 0.1365                                                  |
| No. Variables                                                         | 541                                                                                                                                           | 433                                                          | 433                                                     |
| Goodness of fit                                                       | 1.042                                                                                                                                         | 1.112                                                        | 1.015                                                   |
| $\Delta\rho_{\text{max}}; \Delta\rho_{\text{min}}$ /e·Å <sup>-3</sup> | 2.20; -2.27                                                                                                                                   | 1.77; -2.08                                                  | 0.90; -1.44                                             |
| CCDC Deposition N.                                                    | 2324443                                                                                                                                       | 2324442                                                      | 2324438                                                 |
| Compound                                                              | 7-Cl@100 K                                                                                                                                    | 7-Br@298 K                                                   | 4a-Cl@298 K                                             |
| Formula                                                               | $\text{PdC}_{19}\text{H}_{19}\text{ClN}_2\text{O}_2\text{S}$                                                                                  | $\text{PdC}_{19}\text{H}_{19}\text{BrN}_2\text{O}_2\text{S}$ | $\text{PdC}_{40}\text{H}_{32}\text{ClFeNO}_2\text{P}_2$ |
| M/g·mol <sup>-1</sup>                                                 | 481.27                                                                                                                                        | 525.73                                                       | 818.30                                                  |
| Space group                                                           | <i>P</i> 2 <sub>1</sub> / <i>c</i>                                                                                                            | <i>P</i> 2 <sub>1</sub> / <i>c</i>                           | <i>P</i> 2 <sub>1</sub> / <i>c</i>                      |
| Crystal system                                                        | Monoclinic                                                                                                                                    | Monoclinic                                                   | Monoclinic                                              |
| <i>a</i> /Å                                                           | 10.656(2)                                                                                                                                     | 10.774(2)                                                    | 21.819(4)                                               |
| <i>b</i> /Å                                                           | 15.118(3)                                                                                                                                     | 15.515(3)                                                    | 9.590(2)                                                |
| <i>c</i> /Å                                                           | 11.730(2)                                                                                                                                     | 11.805(2)                                                    | 17.302(3)                                               |
| $\alpha$ /°                                                           | 90                                                                                                                                            | 90                                                           | 90                                                      |
| $\beta$ /°                                                            | 95.77(3)                                                                                                                                      | 95.72(3)                                                     | 106.89(3)                                               |
| $\gamma$ /°                                                           | 90                                                                                                                                            | 90                                                           | 90                                                      |
| V/Å <sup>3</sup>                                                      | 1880.1(7)                                                                                                                                     | 1963.5(7)                                                    | 3464.1(13)                                              |
| <i>Z</i>                                                              | 4                                                                                                                                             | 4                                                            | 4                                                       |
| T/K                                                                   | 100(2)                                                                                                                                        | 298(2)                                                       | 298(2)                                                  |
| D/g·cm <sup>-3</sup>                                                  | 1.700                                                                                                                                         | 1.778                                                        | 1.569                                                   |
| F(000)                                                                | 968                                                                                                                                           | 1040                                                         | 1656                                                    |
| $\mu$ /mm <sup>-1</sup>                                               | 0.857                                                                                                                                         | 2.153                                                        | 0.781                                                   |
| Measured Reflections                                                  | 43969                                                                                                                                         | 45706                                                        | 80221                                                   |
| Unique Reflections                                                    | 8214                                                                                                                                          | 8479                                                         | 15222                                                   |
| R <sub>int</sub>                                                      | 0.0277                                                                                                                                        | 0.0316                                                       | 0.0192                                                  |
| Obs. Refl.ns [ $I \geq 2\sigma(I)$ ]                                  | 7978                                                                                                                                          | 7537                                                         | 13869                                                   |
| $\theta_{\text{min}} - \theta_{\text{max}}$ /°                        | 1.68 – 31.07                                                                                                                                  | 1.90 – 31.10                                                 | 0.85 – 31.10                                            |
| hkl ranges                                                            | -16,16; -25,25; -18,18                                                                                                                        | -17,17; -24,24; -19,19                                       | -35,35; -14,14; -28,28                                  |
| R(F <sup>2</sup> ) (Obs.Refl.ns)                                      | 0.0215                                                                                                                                        | 0.0313                                                       | 0.0322                                                  |
| wR(F <sup>2</sup> ) (All Refl.ns)                                     | 0.0628                                                                                                                                        | 0.0894                                                       | 0.0969                                                  |

|                                                              |             |             |             |
|--------------------------------------------------------------|-------------|-------------|-------------|
| No. Variables                                                | 239         | 239         | 410         |
| Goodness of fit                                              | 1.042       | 1.038       | 1.021       |
| $\Delta\rho_{\max}; \Delta\rho_{\min}/e\cdot\text{\AA}^{-3}$ | 1.44; -0.85 | 1.61; -1.46 | 1.53; -1.21 |
| CCDC Deposition N.                                           | 2324439     | 2324440     | 2324441     |

**Table S2.** Selected palladium distances and angles for **6a** at 100 K.

| <b>6a (100 K) - PdC<sub>42</sub>H<sub>32</sub>INO<sub>3</sub>P<sub>2</sub></b> |          |                  |           |
|--------------------------------------------------------------------------------|----------|------------------|-----------|
| Distances                                                                      | (Å)      | Angles           | (°)       |
| Pd_1-C3_4                                                                      | 2.018(3) | C3_4-Pd_1-I_3    | 85.59(6)  |
| Pd_1-I_3                                                                       | 2.628(1) | P10_2-Pd_1-C3_4  | 88.91(7)  |
| Pd_1-P10_2                                                                     | 2.301(1) | P10_2-Pd_1-P30_2 | 101.07(3) |
| Pd_1-P30_2                                                                     | 2.398(1) | P30_2-Pd_1-I_3   | 86.91(2)  |

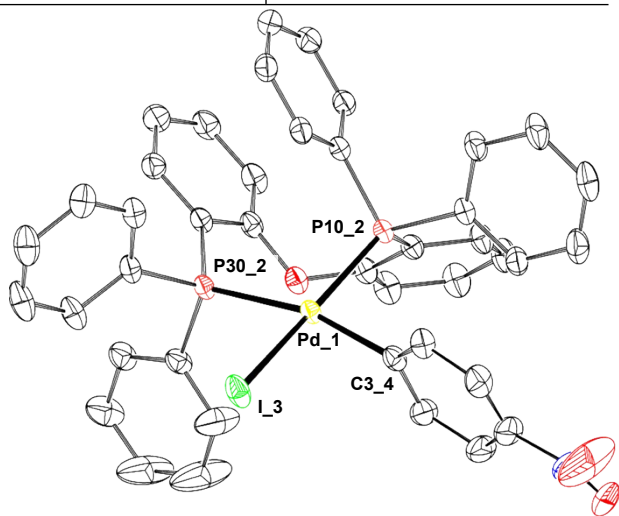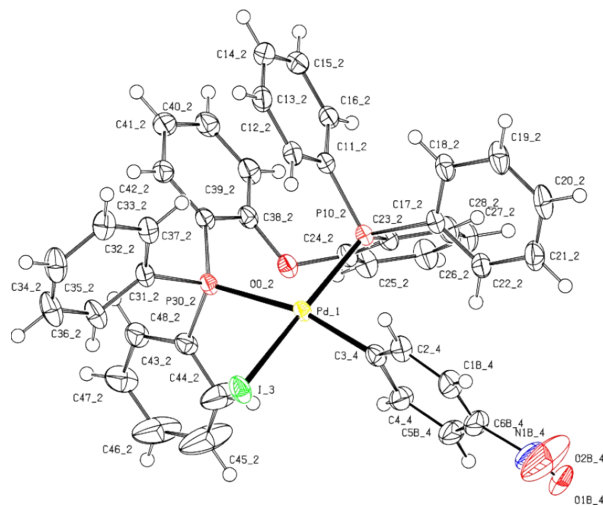

**Table S3.** Selected palladium distances and angles for **4a** at 100 K.

| 4a (100 K) - PdC <sub>40</sub> H <sub>32</sub> IFeNO <sub>2</sub> P <sub>2</sub> |          |                |           |
|----------------------------------------------------------------------------------|----------|----------------|-----------|
| Distances                                                                        | (Å)      | Angles         | (°)       |
| Pd_1-C3_3                                                                        | 2.041(3) | C3_3-Pd_1-I_4  | 84.49(8)  |
| Pd_1-I_4                                                                         | 2.640(1) | P1_2-Pd_1-C3_3 | 86.86(8)  |
| Pd_1-P1_2                                                                        | 2.286(1) | P1_2-Pd_1-P2_2 | 100.02(3) |
| Pd_1-P2_2                                                                        | 2.405(1) | P2_2-Pd_1-I_4  | 88.63(2)  |

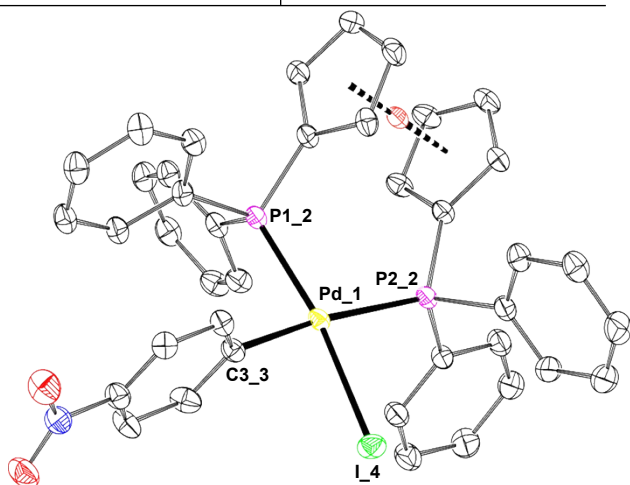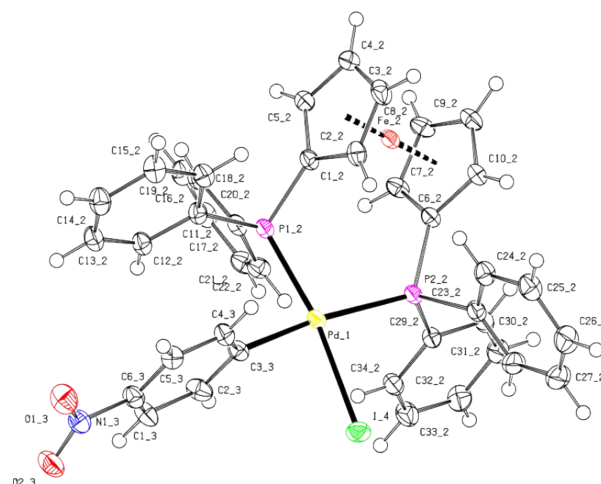**Table S4.** Selected palladium distances and angles for **4a-Br** at 298 K.

| 4a-Br (298 K) - PdC <sub>40</sub> H <sub>32</sub> BrFeNO <sub>2</sub> P <sub>2</sub> |          |                |          |
|--------------------------------------------------------------------------------------|----------|----------------|----------|
| Distances                                                                            | (Å)      | Angles         | (°)      |
| Pd_1-C3_3                                                                            | 2.046(3) | C3_3-Pd_1-Br_4 | 85.22(8) |
| Pd_1-Br_4                                                                            | 2.512(1) | P1_2-Pd_1-C3_3 | 87.05(8) |
| Pd_1-P1_2                                                                            | 2.279(1) | P1_2-Pd_1-P2_2 | 99.91(3) |
| Pd_1-P2_2                                                                            | 2.409(1) | P2_2-Pd_1-Br_4 | 87.80(2) |

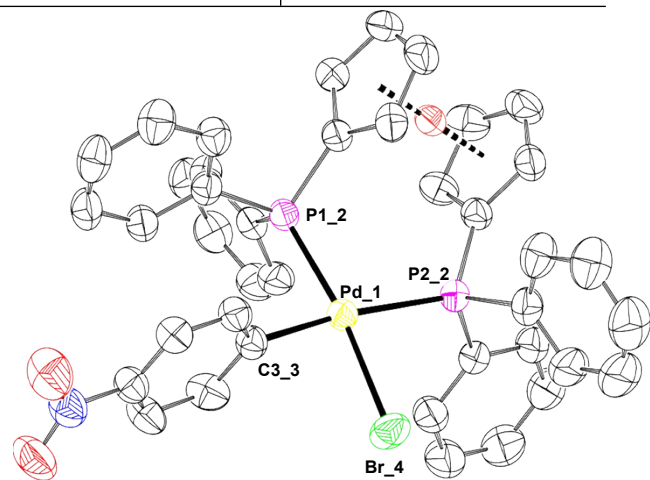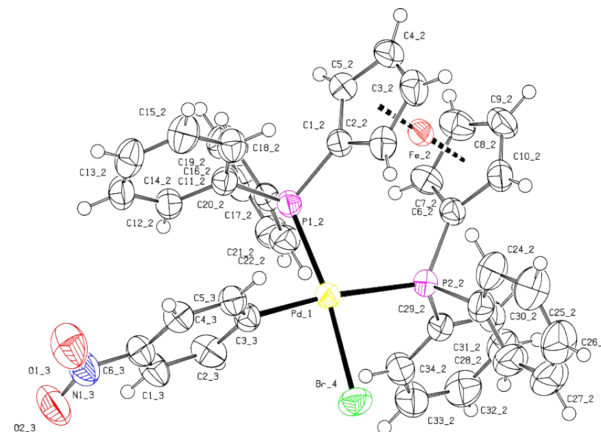





**Table S5.** Selected palladium distances and angles for **7-Cl** at 100 K.

| 7-Cl (100 K) – PdC <sub>19</sub> H <sub>19</sub> ClN <sub>2</sub> O <sub>2</sub> S |          |                |          |
|------------------------------------------------------------------------------------|----------|----------------|----------|
| Distances                                                                          | (Å)      | Angles         | (°)      |
| Pd_1-C3_4                                                                          | 1.978(1) | C3_4-Pd_1-Cl_3 | 88.98(3) |
| Pd_1-Cl_3                                                                          | 2.340(1) | Cl_3-Pd_1-N1_2 | 95.19(3) |
| Pd_1-S_2                                                                           | 2.276(1) | N1_2-Pd_1-S_2  | 85.02(3) |
| Pd_1-N1_2                                                                          | 2.139(1) | C3_4-Pd_1-S_2  | 90.83(3) |

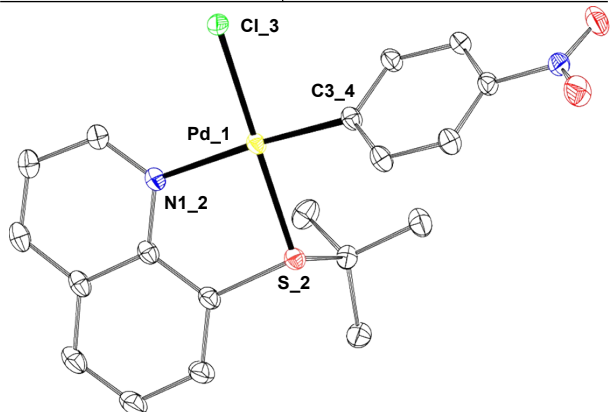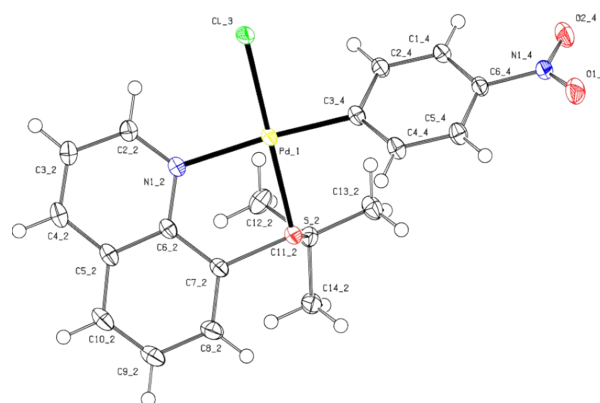**Table S6.** Selected palladium distances and angles for **7-Br** at 298 K.

| 7-Br (298 K) - PdC <sub>19</sub> H <sub>19</sub> BrN <sub>2</sub> O <sub>2</sub> S |          |                |          |
|------------------------------------------------------------------------------------|----------|----------------|----------|
| Distances                                                                          | (Å)      | Angles         | (°)      |
| Pd_1-C3_4                                                                          | 1.984(2) | C3_4-Pd_1-Br_3 | 88.51(5) |
| Pd_1-Br_3                                                                          | 2.440(1) | Br_3-Pd_1-N1_2 | 95.59(4) |
| Pd_1-S_2                                                                           | 2.287(1) | N1_2-Pd_1-S_2  | 84.82(4) |
| Pd_1-N1_2                                                                          | 2.145(2) | C3_4-Pd_1-S_2  | 91.08(5) |

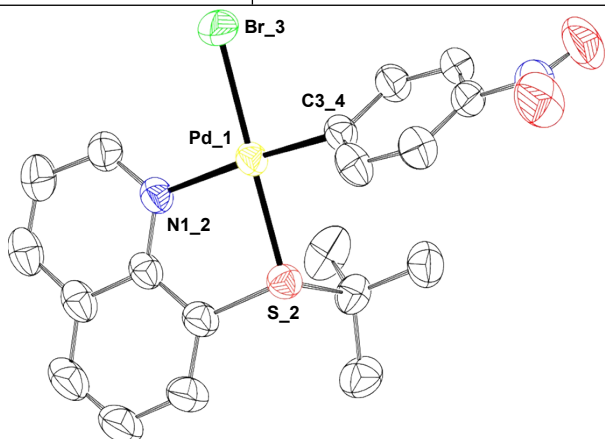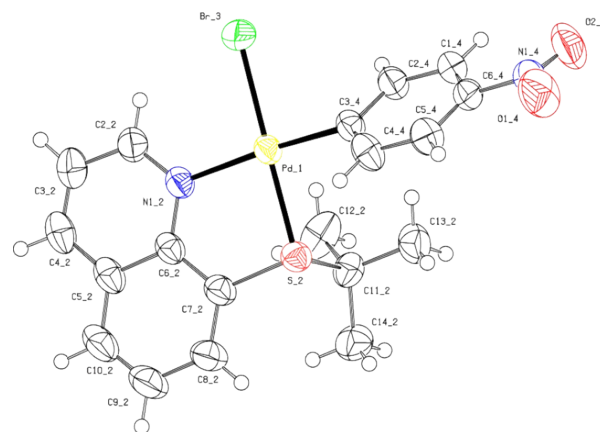

**Table S7.** Selected palladium distances and angles for **4a-Cl** at 298 K.

**4a-Cl (298 K) - PdC<sub>40</sub>H<sub>32</sub>ClFeNO<sub>2</sub>P<sub>2</sub>**

| Distances | (Å)      | Angles         | (°)       |
|-----------|----------|----------------|-----------|
| Pd_1-C3_4 | 2.034(2) | C3_4-Pd_1-Cl_3 | 85.97(4)  |
| Pd_1-Cl_3 | 2.391(1) | P1_2-Pd_1-C3_4 | 87.72(4)  |
| Pd_1-P1_2 | 2.273(1) | P1_2-Pd_1-P2_2 | 100.37(2) |
| Pd_1-P2_2 | 2.396(1) | P2_2-Pd_1-Cl_3 | 85.89(2)  |

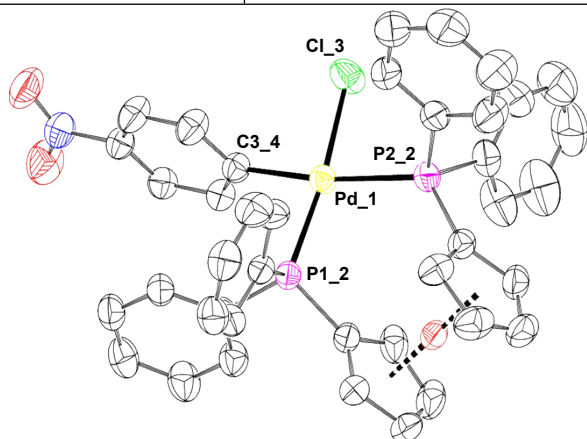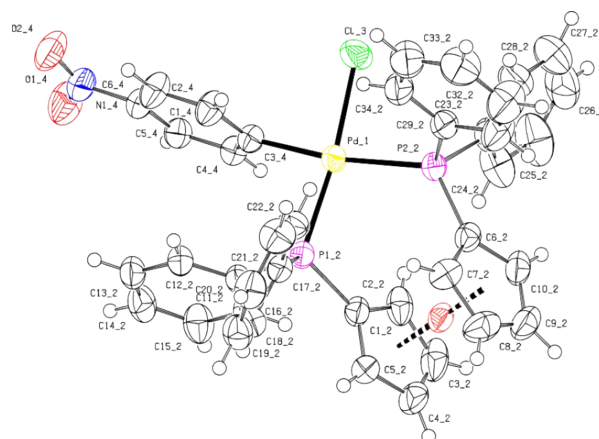

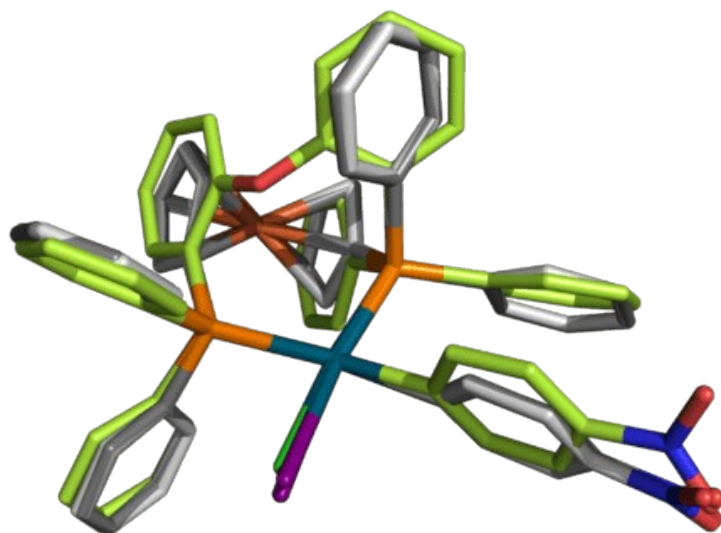

**Figure S70.** Superimposition of **6a** (green sticks), **4a**, **4a-Br** and **4a-Cl** (sticks with different shades of grey). Hydrogens omitted for clarity.

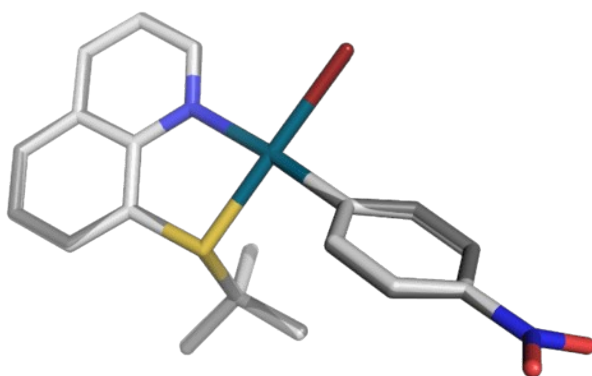

**Figure S71.** Superimposition of **7-Cl** (dark grey sticks) and **7-Br** (light grey sticks). Hydrogens omitted for clarity.

**Table S8.** Diagnostic characterization data of Pd(II)-aryl complexes bearing diphosphine ligands.

| Compound     | <sup>31</sup> P NMR (δ, ppm) | Multiplicity | J <sub>p-p</sub> (Hz) | Pd-C (Å) | Pd-X (Å) | Pd-P (Å)              | P-Pd-P (°) | τ <sub>4</sub> |
|--------------|------------------------------|--------------|-----------------------|----------|----------|-----------------------|------------|----------------|
| <b>2a</b>    | 37.5,<br>51.0                | d<br>d       | 26.1<br>26.1          |          |          |                       |            |                |
| <b>2b</b>    | 35.5,<br>50.2                | d<br>d       | 27.2<br>27.2          |          |          |                       |            |                |
| <b>2c</b>    | 34.0,<br>48.9                | d<br>d       | 27.9<br>27.9          |          |          |                       |            |                |
| <b>2d</b>    | 33.9,<br>48.7                | d<br>d       | 27.6<br>27.6          |          |          |                       |            |                |
| <b>3a</b>    | -9.9,<br>9.7                 | d<br>d       | 52.6<br>52.6          |          |          |                       |            |                |
| <b>3b</b>    | -10.3,<br>10.3               | d<br>d       | 53.3<br>53.3          |          |          |                       |            |                |
| <b>4a</b>    | 9.3,<br>26.2                 | d<br>d       | 32.0<br>32.0          | 2.041(3) | 2.640(1) | 2.286(1)<br>2.405(1)  | 100.02(3)  | 0.11           |
| <b>4a-Br</b> | 10.4,<br>30.3                | d<br>d       | 31.2<br>31.2          | 2.046(3) | 2.512(1) | 2.279(1)<br>2.409(1)  | 99.91(3)   | 0.11           |
| <b>4a-Cl</b> | 11.3,<br>31.5                | d<br>d       | 31.0<br>31.0          | 2.034(2) | 2.391(1) | 2.273(1)<br>2.396(1)  | 100.37(2)  | 0.11           |
| <b>4b</b>    | 8.7,<br>26.5                 | d<br>d       | 33.5<br>33.5          |          |          |                       |            |                |
| <b>4c</b>    | 8.0,<br>26.4                 | d<br>d       | 34.5<br>34.5          |          |          |                       |            |                |
| <b>5a</b>    | 45.1,<br>51.2                | d<br>d       | 26.4<br>26.4          |          |          |                       |            |                |
| <b>5b</b>    | 43.8,<br>51.1                | d<br>d       | 27.4<br>27.4          |          |          |                       |            |                |
| <b>6a</b>    | 5.2,<br>9.7                  | d<br>d       | 33.0<br>33.0          | 2.018(3) | 2.628(1) | 2.301(1),<br>2.398(1) | 101.07(3)  | 0.20           |
| <b>6b</b>    | 4.3,<br>10.4                 | d<br>d       | 34.0<br>34.0          |          |          |                       |            |                |

## KINETIC STUDY OF THE FORMATION OF DPPBZ COMPLEXES

Preliminary attempts to obtain  $[\text{Pd}(\text{p-R-Ph})(\text{dppbz})]$  (**5a-b**) complexes have highlighted that the substitution reaction of the tmeda ligand with dppbz is a moderately slow reaction. This fact is rather unusual considering the high rate with which ligand exchange processes generally occur in Pd(II) complexes, and it is certainly attributable to a combination of the steric hindrance and rigidity of the dppbz ligand. The slow formation of the target products allowed us to undertake a detailed kinetic study of the reaction which, in addition to being intrinsically interesting, it precisely indicated us the time necessary for the preparation of the complexes of interest.

The technique that has proven to be most suitable for the kinetic analysis of the reaction was the  $^1\text{H-NMR}$  spectroscopy. Using  $[\text{Pd}(\text{p-NO}_2\text{-Ph})(\text{tmeda})]$  (**1a**) as a model substrate, the operating conditions adopted are indicated in Figure S72.

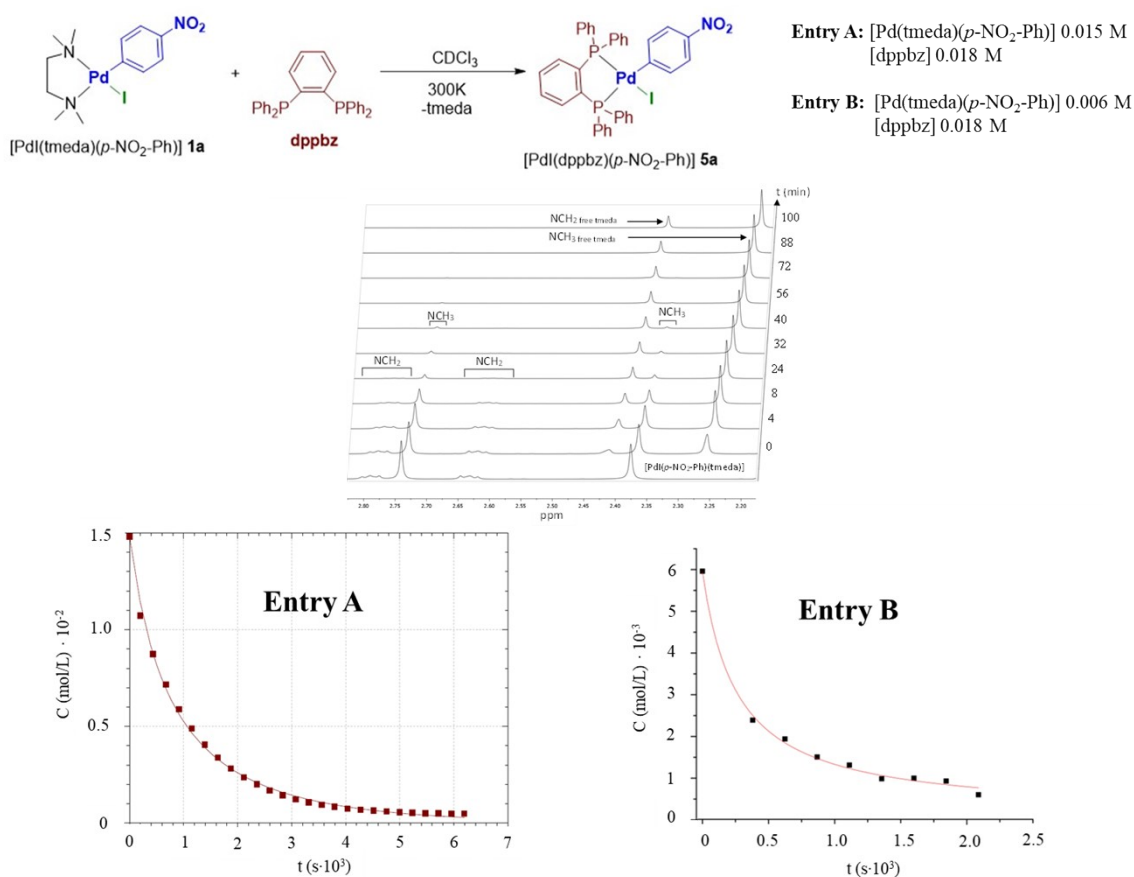

**Figure S72.** Kinetic study in the case of complex **5a**.

The integration of one of the peaks of the methyl groups of the coordinated tmeda allowed the exact quantification of the variation in concentration of the starting complex over time.

The kinetic law that reasonably governs the process is of the second order with dependence both on the concentration of the starting complex and diphosphine ligand (equation 1):

$$\text{Equation 1. } -d[\text{complex}]/dt = k[\text{complex}][\text{dppbz}]$$

This law effectively agrees with the experimental data as can be seen from the fitting (figure 6) obtained from the non-linear regression based on the system of equations (complex =  $[\text{Pd}(\text{p-NO}_2\text{-Ph})(\text{tmeda})]$  (**1a**) and product =  $[\text{Pd}(\text{p-NO}_2\text{-Ph})(\text{dppbz})]$  (**5a**):

$$\text{Equations 2a-c. } \begin{cases} a) -d[\text{complex}]/dt = k[\text{complex}][\text{dppbz}] \\ b) [\text{complex}]_0 = [\text{complex}] + [\text{product}] \\ c) [\text{product}]_0 = [\text{dppbz}] + [\text{product}] \end{cases}$$

The value of the kinetic constant ( $k$ ) obtained from the regression analysis, using two different set of complex and dppbz concentrations: entry A ( $[\text{Pd}(\textit{p}\text{-NO}_2\text{-Ph})(\textit{tmeda})]=0.015\text{ M}$ ,  $[\text{dppbz}]=0.018\text{ M}$ ); entry B ( $[\text{Pd}(\textit{p}\text{-NO}_2\text{-Ph})(\textit{tmeda})]=0.006\text{ M}$ ,  $[\text{dppbz}]=0.018\text{ M}$ ), are  $0.068 \pm 0.005\text{ L}\cdot\text{mol}^{-1}\cdot\text{s}^{-1}$  and  $0.071 \pm 0.007\text{ L}\cdot\text{mol}^{-1}\cdot\text{s}^{-1}$ , respectively.

A computational DFT study has shed light on the mechanism that governs the substitution process between the two bidentate ligands. As can be seen from Figure 7, the rate-determining step is the coordination of one of the two phosphorous atoms to the metal center. This fact is in accordance with the experimentally observed second order law.

Curiously, this attack leads to the displacement of the nitrogen atom of *tmeda* *trans* to the halide (a less *trans*-labilizing ligand with respect to the aryl one). However, this result is justified by the obtainment of a more stable intermediate in which the entering phosphorus is located in *trans* to the iodide.

Finally, the process is completed with a fast intramolecular step that determines the final release of the *tmeda* ligand. This explains the lack of signals ascribable to the intermediate species in the recorded NMR spectra.

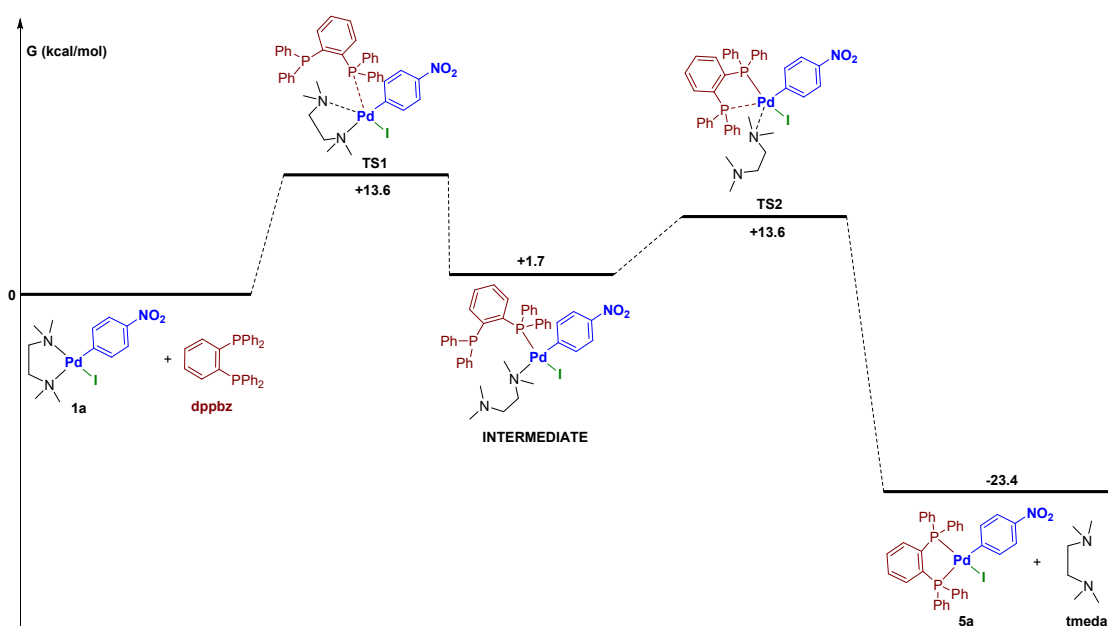

**Figure S73.** Proposed mechanism for the reaction studied.
